# Supplementary material for: Stress Perception and Coping as Mediators of the Link Between Self-Compassion and Affective Well-being? Evidence From Two Longitudinal Studies
Source: Springer Nature journal article supplement (doi:10.1007/s12671-023-02295-1), 2024-01-17
Supplement: MOESM1 [file 26634282]

**Table S1** All additional trait measures assessed in Study 1

| <b>Variable</b>        | <b>Questionnaire</b>                                                                   | <b>Items</b> | <b>Scale</b> |
|------------------------|----------------------------------------------------------------------------------------|--------------|--------------|
| Self-esteem            | Rosenberg Self-Esteem Scale - RSE<br>(Rosenberg, 1965; Collani & Herzberg, 2003)       | 10           | 1-4          |
| Self-efficacy          | Generalized Self-Efficacy Scale - GSE (Jerusalem & Schwarzer, 1995)                    | 10           | 1-4          |
| Satisfaction with Life | Satisfaction With Life Scale - SWLS<br>(Diener et al., 1985; Glaesmer, 2011)           | 5            | 1-7          |
| Big Five               | 10-item-Big-Five-Inventory – BFI-10<br>(Rammstedt & John, 2007)                        | 4            | 1-5          |
| Mindfulness            | Five Facet Mindfulness Questionnaire - FFMQ (Baer et al., 2006; Michalak et al., 2016) | 37           | 1-5          |
| Narcissism             | Narcissistic Admiration and Rivalry Questionnaire - NARQ (Back et al., 2013)           | 18           | 1-6          |

## References

- Back, M. D., Kufner, A. C. P., Dufner, M., Gerlach, T. M., Rauthmann, J. F., & Denissen, J. J. A. (2013). Narcissistic admiration and rivalry: Disentangling the bright and dark sides of narcissism. *Journal of Personality and Social Psychology*, 105, 1013-1037.
- Baer, R. A., Smith, G. T., Hopkins, J., Krietemeyer, J., & Toney, L. (2006). Using self-report assessment methods to explore facets of mindfulness. *Assessment*, 13(1), 27–45.  
<https://doi.org/10.1177/1073191105283504>.
- Collani, G., & Herzberg, P. Y. (2003). Eine revidierte Fassung der deutschsprachigen Skala zum Selbstwertgefühl von Rosenberg [A revised version of the German adaptation of Rosenberg's Self-Esteem Scale]. *Zeitschrift für Differentielle und Diagnostische Psychologie*, 24 (1), 3-7. <https://doi.org/10.1024/0170-1789.24.1.3>.
- Diener, E., Emmons, Robert, A., Larsen, R. J., & Griffin, S. (1985). The Satisfaction With Life Scale. *Journal of Personality Assessment*, 49(1), 71–75.  
[https://doi.org/10.1207/s15327752jpa4901\\_13](https://doi.org/10.1207/s15327752jpa4901_13).
- Glaesmer, H., Grande, G., Braehler, E., & Roth, M. (2011). The German Version of the Satisfaction With Life Scale (SWLS). *European Journal of Psychological Assessment*, 27(2), 127–132. <https://doi.org/10.1027/1015-5759/a000058>.
- Michalak, J., Zabok, G., Drews, M., Otto, D., Mertens, D., Ströhle, G., Schwinger, M., Dahme, B., & Heidenreich, T. (2016). Erfassung von Achtsamkeit mit der deutschen Version des Five Facet Mindfulness Questionnaires (FFMQ-D) [Assessing mindfulness with the German version of the Five Facet Mindfulness Questionnaire (FFMQ-D)]. *Zeitschrift für Gesundheitspsychologie*, 24 (1), 1-12.  
<https://doi.org/10.1026/0943-8149/a000149>.

Rammstedt, B., & John, O. P. (2007). Measuring personality in one minute or less: A 10-item short version of the Big Five Inventory in English and German. *Journal of Research in Personality, 41*(1), 203–212. <https://doi.org/10.1016/j.jrp.2006.02.001>.

Rosenberg, M. (1965): *Society and the Adolescent Self-Image*. Princeton University Press.

Schwarzer R & Jerusalem M. (1995). Generalized Self-Efficacy scale. In J. Weinman, Wright, S., Johnston, M. (Eds.), *Measures in health psychology: A user's portfolio. Causal and control beliefs* (pp. 35-37). Windsor.
