# Supplementary material for: Stress Perception and Coping as Mediators of the Link Between Self-Compassion and Affective Well-being? Evidence From Two Longitudinal Studies
Source: Springer Nature journal article supplement (doi:10.1007/s12671-023-02295-1), 2024-01-17
Supplement: MOESM2 [file 26634282]

**Table S2***Cross-lagged and autoregressive effects among SC, perceived stress, coping, and AWB (Study 1)*

|                             | Estimate         | Standard Error | 95% CI                  |
|-----------------------------|------------------|----------------|-------------------------|
| <b>Cross-lagged paths</b>   |                  |                |                         |
| <b>SC-T1 → ST-T2</b>        | <b>-0.221**</b>  | <b>0.069</b>   | <b>[-0.359, -0.091]</b> |
| SC-T2 → ST-T3               | -0.394***        | 0.078          | [-0.551, -0.224]        |
| <b>SC-T1 → EC-T2</b>        | <b>0.030***</b>  | <b>0.006</b>   | <b>[0.018, 0.043]</b>   |
| SC-T2 → EC-T3               | 0.021**          | 0.006          | [0.009, 0.034]          |
| <b>SC-T1 → DC-T2</b>        | <b>-0.013***</b> | <b>0.005</b>   | <b>[-0.023, -0.004]</b> |
| SC-T2 → DC-T3               | -0.013**         | 0.005          | [0.041, -0.021]         |
| SC-T1 → AWB-T3              | 0.022**          | 0.007          | [0.007, 0.037]          |
| SC-T2 → AWB-T3              | 0.019+           | 0.010          | [-0.001, 0.037]         |
| <b>ST-T2 → AWB-T3</b>       | <b>-0.011**</b>  | <b>0.001</b>   | <b>[-0.019, -0.003]</b> |
| <b>EC-T2 → AWB-T3</b>       | <b>-0.017</b>    | <b>0.036</b>   | <b>[-0.089, 0.055]</b>  |
| <b>DC-T2 → AWB-T3</b>       | <b>0.019</b>     | <b>0.045</b>   | <b>[-0.069, 0.108]</b>  |
| SC-T1 → AWB-T2              | 0.012            | 0.007          | [-0.002, 0.026]         |
| ST-T1 → AWB-T2              | -0.005           | 0.004          | [-0.013, 0.002]         |
| EC-T1 → AWB-T2              | 0.027            | 0.033          | [-0.037, 0.092]         |
| DC-T1 → AWB-T2              | -0.038           | 0.041          | [-0.119, 0.041]         |
| <b>Autoregressive paths</b> |                  |                |                         |
| SC-T1 → SC-T2               | 0.802***         | 0.021          | [0.761, 0.843]          |
| SC-T1 → SC-T3               | 0.163***         | 0.030          | [0.105, 0.223]          |
| SC-T2 → SC-T3               | 0.802***         | 0.021          | [0.761, 0.843]          |
| ST-T1 → ST-T2               | 0.510***         | 0.036          | [0.436, 0.578]          |
| ST-T1 → ST-T3               | 0.176***         | 0.045          | [0.086, 0.264]          |
| ST-T2 → ST-T3               | 0.510***         | 0.036          | [0.436, 0.578]          |
| EC-T1 → EC-T2               | 0.403***         | 0.034          | [0.336, 0.469]          |
| EC-T1 → EC-T3               | 0.224***         | 0.048          | [0.125, 0.315]          |
| EC-T2 → EC-T3               | 0.403***         | 0.034          | [0.336, 0.469]          |
| DC-T1 → DC-T2               | 0.449***         | 0.033          | [0.383, 0.510]          |
| AWB-T1 → AWB-T2             | 0.514***         | 0.032          | [0.448, 0.573]          |
| AWB-T2 → AWB-T3             | 0.514***         | 0.032          | [0.448, 0.573]          |

*Notes.* CI = Confidence interval; SC = Self-compassion, ST = Perceived Stress, EC = Engagement Coping, DC = Disengagement Coping, AWB = Affective Well-Being. Bold font is used for hypotheses relevant paths.

\*\*\* $p < 0.001$ ; \*\* $p < 0.01$ ; +  $p < 0.10$ .

**Table S3***Cross-lagged and autoregressive effects among SC, perceived stress, coping, and AWB (Study 2)*

|                       | Estimate         | Standard Error | 95% CI                  |
|-----------------------|------------------|----------------|-------------------------|
| Cross-lagged paths    |                  |                |                         |
| <b>SC-T1 → ST-T2</b>  | <b>-1.290***</b> | <b>0.292</b>   | <b>[-1.881, -0.730]</b> |
| SC-T2 → ST-T3         | -1.081*          | 0.283          | [-1.626, -0.507]        |
| <b>SC-T1 → EC-T2</b>  | <b>0.432***</b>  | <b>0.058</b>   | <b>[0.315, 0.545]</b>   |
| SC-T2 → EC-T3         | 0.358***         | 0.059          | [0.242, 0.475]          |
| <b>SC-T1 → DC-T2</b>  | <b>-0.080</b>    | <b>0.056</b>   | <b>[-0.187, 0.034]</b>  |
| SC-T2 → DC-T3         | -0.145*          | 0.060          | [-0.257, -0.019]        |
| SC-T1 → AWB-T3        | 0.073            | 0.052          | [-0.031, 0.172]         |
| SC-T2 → AWB-T3        | 0.035            | 0.060          | [-0.080, 0.151]         |
| <b>ST-T2 → AWB-T3</b> | <b>-0.021***</b> | <b>0.003</b>   | <b>[-0.026, -0.014]</b> |
| <b>EC-T2 → AWB-T3</b> | <b>0.030+</b>    | <b>0.018</b>   | <b>[-0.004, 0.065]</b>  |
| <b>DC-T2 → AWB-T3</b> | <b>-0.036**</b>  | <b>0.014</b>   | <b>[-0.063, -0.010]</b> |
| SC-T1 → AWB-T2        | 0.187***         | 0.046          | [0.116, 0.303]          |
| EC-T1 → SC-T2         | 0.063***         | 0.008          | [0.048, 0.078]          |
| ST-T1 → AWB-T2        | -0.021***        | 0.003          | [-0.028, -0.015]        |
| EC-T1 → AWB-T2        | 0.034*           | 0.016          | [0.003, 0.066]          |
| DC-T1 → AWB-T2        | -0.032*          | 0.013          | [-0.058, -0.007]        |
| Autoregressive paths  |                  |                |                         |
| SC-T1 → SC-T2         | 0.541***         | 0.021          | [0.498, 0.582]          |
| SC-T1 → SC-T3         | 0.311***         | 0.024          | [0.264, 0.358]          |
| SC-T2 → SC-T3         | 0.411***         | 0.024          | [0.365, 0.459]          |
| ST-T1 → ST-T2         | 0.691***         | 0.016          | [0.659, 0.722]          |
| ST-T1 → ST-T3         | 0.285***         | 0.021          | [0.244, 0.327]          |
| ST-T2 → ST-T3         | 0.469***         | 0.020          | [0.430, 0.508]          |
| EC-T1 → EC-T2         | 0.465***         | 0.022          | [0.421, 0.509]          |
| EC-T1 → EC-T3         | 0.278***         | 0.023          | [0.232, 0.325]          |
| EC-T2 → EC-T3         | 0.308***         | 0.024          | [0.263, 0.356]          |
| DC-T1 → DC-T2         | 0.549***         | 0.016          | [0.515, 0.579]          |
| DC-T1 → DC-T3         | 0.341***         | 0.022          | [0.297, 0.384]          |
| DC-T2 → DC-T3         | 0.355***         | 0.023          | [0.310, 0.399]          |
| AWB-T1 → AWB-T2       | 0.577***         | 0.021          | [0.534, 0.618]          |
| AWB-T2 → AWB-T3       | 0.583***         | 0.023          | [0.537, 0.627]          |

*Notes.* CI = Confidence interval; SC = Self-compassion, ST = Perceived Stress, EC = Engagement Coping, DC = Disengagement Coping, AWB = Affective Well-Being. Bold font is used for hypotheses relevant paths.

\*\*\* $p < 0.001$ ; \*\* $p < 0.01$ ; +  $p < 0.10$ , 90% CI = [0.002, 0.059].

We had also planned to control our effects for neuroticism initially (see preregistration) but refrained from doing so for two reasons. First, we wanted to ensure a clearer theoretical focus of our manuscript. Second, we could not integrate these variables in Study 2 because of the time limit to generalize our findings. Third, the BFI-10 which was only used in Study 1 assesses neuroticism with only two items. Although the abbreviated 10-item-version has been shown to capture a sufficient amount of variance compared to the full version with 44 items, the loss in psychometric properties is still considerable (Rammstedt & John, 2007). Moreover, measuring a broad personality dimension with only two items (compared to SC which was measured with 26 items) necessarily comes with a significant loss of information on the sub-facet-level with might be substantial in order to evaluate incremental validity of SC above neuroticism. For the sake of completeness, we also tested whether the effects of SC on perceived stress and coping held when controlling for the effects of neuroticism implemented as an additional independent variable in an alternative cross-lagged panel model and presented the results in Table S4.

**Table S4**

*Cross-lagged and autoregressive effects among SC, perceived stress, coping, and AWB in the model controlling for Neuroticism (Study 1)*

|                                   | Estimate        | Standard Error | 95% CI                  |
|-----------------------------------|-----------------|----------------|-------------------------|
| <b>Cross-lagged paths</b>         |                 |                |                         |
| <b>SC-T1 → ST-T2<sub>N</sub></b>  | <b>-0.195*</b>  | <b>0.077</b>   | <b>[-0.345, -0.043]</b> |
| SC-T2 → ST-T3 <sub>N</sub>        | -0.394***       | 0.078          | [-0.533, -0.211]        |
| <b>SC-T1 → EC-T2<sub>N</sub></b>  | <b>0.031***</b> | <b>0.007</b>   | <b>[0.016, 0.045]</b>   |
| SC-T2 → EC-T3 <sub>N</sub>        | 0.022**         | 0.008          | [0.007, 0.039]          |
| <b>SC-T1 → DC-T2<sub>N</sub></b>  | <b>-0.018**</b> | <b>0.006</b>   | <b>[-0.023, -0.004]</b> |
| SC-T2 → DC-T3 <sub>N</sub>        | -0.029**        | 0.005          | [0.042, -0.016]         |
| SC-T1 → AWB-T3 <sub>N</sub>       | 0.022**         | 0.007          | [0.008, 0.036]          |
| SC-T2 → AWB-T3 <sub>N</sub>       | 0.017+          | 0.009          | [-0.001, 0.036]         |
| <b>ST-T2 → AWB-T3<sub>N</sub></b> | <b>-0.011**</b> | <b>0.004</b>   | <b>[-0.018, -0.003]</b> |
| <b>EC-T2 → AWB-T3<sub>N</sub></b> | <b>-0.019</b>   | <b>0.037</b>   | <b>[-0.093, 0.052]</b>  |
| <b>DC-T2 → AWB-T3<sub>N</sub></b> | <b>0.013</b>    | <b>0.044</b>   | <b>[-0.074, 0.097]</b>  |
| SC-T1 → AWB-T2 <sub>N</sub>       | 0.013+          | 0.007          | [-0.001, 0.027]         |
| ST-T1 → AWB-T2 <sub>N</sub>       | -0.004          | 0.004          | [-0.012, 0.003]         |
| EC-T1 → AWB-T2 <sub>N</sub>       | 0.023           | 0.034          | [-0.043, 0.090]         |
| DC-T1 → AWB-T2 <sub>N</sub>       | -0.041          | 0.043          | [-0.125, 0.041]         |
| N-T1 → ST-T2                      | 0.299           | 0.236          | [-0.169, 0.762]         |
| N-T2 → ST-T3                      | -0.028          | 0.303          | [-0.612, 0.563]         |
| N-T1 → EC-T2                      | 0.004           | 0.024          | [-0.042, 0.052]         |
| N-T2 → EC-T3                      | 0.006           | 0.033          | [-0.056, 0.072]         |
| N-T1 → DC-T2                      | -0.035          | 0.023          | [-0.612, 0.563]         |

|                             |          |       |                 |
|-----------------------------|----------|-------|-----------------|
| N-T2 → DC-T3                | 0.013    | 0.024 | [-0.037, 0.059] |
| <b>Autoregressive paths</b> |          |       |                 |
| SC-T1 → SC-T2               | 0.489*** | 0.037 | [0.757, 0.839]  |
| SC-T1 → SC-T3               | 0.159*** | 0.031 | [0.099, 0.220]  |
| SC-T2 → SC-T3               | 0.799*** | 0.021 | [0.741, 0.839]  |
| ST-T1 → ST-T2               | 0.510*** | 0.036 | [0.417, 0.561]  |
| ST-T1 → ST-T3               | 0.185*** | 0.045 | [0.092, 0.273]  |
| ST-T2 → ST-T3               | 0.489*** | 0.036 | [0.417, 0.561]  |
| EC-T1 → EC-T2               | 0.404*** | 0.034 | [0.337, 0.469]  |
| EC-T1 → EC-T3               | 0.221*** | 0.048 | [0.125, 0.315]  |
| EC-T2 → EC-T3               | 0.404*** | 0.034 | [0.337, 0.469]  |
| DC-T1 → DC-T2               | 0.446*** | 0.033 | [0.383, 0.510]  |
| DC-T2 → DC-T3               | 0.446*** | 0.033 | [0.383, 0.509]  |
| AWB-T1 → AWB-T2             | 0.507*** | 0.032 | [0.441, 0.566]  |
| AWB-T2 → AWB-T3             | 0.507*** | 0.032 | [0.441, 0.566]  |
| N-T1 → N-T2                 | 0.590*** | 0.031 | [0.528, 0.649]  |
| N-T1 → N-T3                 | 0.305*** | 0.040 | [0.227, 0.382]  |
| N-T2 → N-T3                 | 0.590*** | 0.031 | [0.528, 0.649]  |

*Notes.* CI = Confidence interval; SC = Self-compassion, ST = Perceived Stress, EC = Engagement Coping, DC = Disengagement Coping, AWB = Affective Well-Being. The subscript N indicates that the effects were controlled for Neuroticism. Bold font is used for hypotheses relevant paths.  $\chi^2(76) = 179.95, p > .001$ , RMSEA = .04, SRMR = .05, CFI = .97.

\*\*\* $p < 0.001$ ; \*\* $p < 0.01$ ; +  $p < 0.10$ .

The indirect effects were comparable to our original model for study 1 (see Table S5).

**Table S5**

*Indirect effects of self-compassion on affective well-being via perceived stress and coping controlled for neuroticism*

|                                      | Estimate | Standard Error | 95% CI          |
|--------------------------------------|----------|----------------|-----------------|
| SC <sub>N</sub> -T1 → ST-T2 → AWB-T3 | 0.002+   | 0.001          | [0.000, 0.005]  |
| SC <sub>N</sub> -T1 → EC-T2 → AWB-T3 | -0.001   | 0.001          | [-0.003, 0.001] |
| SC <sub>N</sub> -T1 → DC-T2 → AWB-T3 | <0.001   | 0.001          | [-0.002, 0.001] |

*Notes.* CI = Confidence interval; SC = Self-compassion, ST = Stress, EC = Engagement Coping, DC = Disengagement Coping, AWB = Affective Well-being. The subscript N indicates that the effects were controlled for Neuroticism.

\*\* $p < 0.05$ ; + =  $p < 0.10$ .

To extend our findings on different well-being components, we had originally included cognitive well-being as a dependent variable in our preregistration for the GESIS Panel. Cognitive well-being was assessed with three of the five items of the standardized German version of the Satisfaction with Life Scale (SWLS; Diener et al. (1985); Glaesmer et al. (2011)). For a clearer theoretical focus, we decided to include only affective well-being in this work. For further information, we presented all autoregressive, cross-lagged effects and indirect effects estimates in the following.

**Table S6**

*Cross-lagged and autoregressive effects among SC, perceived stress, coping, and CWB (Study 2)*

|                             | Estimate           | Standard Error | 95% CI                  |
|-----------------------------|--------------------|----------------|-------------------------|
| <b>Cross-lagged paths</b>   |                    |                |                         |
| <b>SC-T1 → ST-T2</b>        | <b>-1.271***</b>   | <b>0.295</b>   | <b>[-1.846, -0.686]</b> |
| SC-T2 → ST-T3               | -1.022***          | 0.282          | [-1.584, -0.463]        |
| <b>SC-T1 → EC-T2</b>        | <b>0.428***</b>    | <b>0.058</b>   | <b>[0.314, 0.539]</b>   |
| SC-T2 → EC-T3               | 0.358***           | 0.059          | [0.239, 0.474]          |
| <b>SC-T1 → DC-T2</b>        | <b>-0.078</b>      | <b>0.056</b>   | <b>[-0.181, 0.038]</b>  |
| SC-T2 → DC-T3               | -0.142*            | 0.060          | [-0.254, -0.017]        |
| SC-T1 → CWB-T3              | 0.237              | 0.307          | [-0.365, 0.845]         |
| SC-T2 → CWB-T3              | 0.644 <sup>+</sup> | 0.341          | [-0.057, 1.306]         |
| <b>ST-T2 → CWB-T3</b>       | <b>-0.074***</b>   | <b>0.017</b>   | <b>[-0.106, -0.042]</b> |
| <b>EC-T2 → CWB-T3</b>       | <b>-0.049</b>      | <b>0.097</b>   | <b>[-0.247, 0.133]</b>  |
| <b>DC-T2 → CWB-T3</b>       | <b>-0.095</b>      | <b>0.081</b>   | <b>[-0.259, -0.058]</b> |
| SC-T1 → CWB-T2              | -0.024             | 0.298          | [-0.621, 0.543]         |
| EC-T1 → SC-T2               | 0.063***           | 0.008          | [0.047, 0.078]          |
| ST-T1 → CWB-T2              | -0.129***          | 0.019          | [-0.165, -0.092]        |
| EC-T1 → CWB-T2              | 0.102              | 0.097          | [-0.092, 0.290]         |
| DC-T1 → CWB-T2              | -0.026             | 0.082          | [-0.181, 0.140]         |
| <b>Autoregressive paths</b> |                    |                |                         |
| SC-T1 → SC-T2               | 0.540***           | 0.021          | [0.500, 0.582]          |
| SC-T1 → SC-T3               | 0.311***           | 0.024          | [0.263, 0.385]          |
| SC-T2 → SC-T3               | 0.411***           | 0.024          | [0.364, 0.458]          |
| ST-T1 → ST-T2               | 0.691***           | 0.016          | [0.660, 0.721]          |
| ST-T1 → ST-T3               | 0.312***           | 0.021          | [0.272, 0.353]          |
| ST-T2 → ST-T3               | 0.452***           | 0.020          | [0.412, 0.490]          |
| EC-T1 → EC-T2               | 0.465***           | 0.022          | [0.421, 0.509]          |
| EC-T1 → EC-T3               | 0.279***           | 0.023          | [0.233, 0.324]          |
| EC-T2 → EC-T3               | 0.308***           | 0.023          | [0.262, 0.354]          |
| DC-T1 → EC-T2               | 0.548***           | 0.016          | [0.515, 0.579]          |
| DC-T1 → DC-T3               | 0.349***           | 0.023          | [0.304, 0.392]          |
| DC-T2 → DC-T3               | 0.351***           | 0.023          | [0.305, 0.392]          |

|                 |          |       |                |
|-----------------|----------|-------|----------------|
| CWB-T1 → CWB-T2 | 0.688*** | 0.018 | [0.653, 0.722] |
| CWB-T2 → CWB-T3 | 0.733*** | 0.017 | [0.700, 0.766] |

*Notes.* CI = Confidence interval; SC = Self-Compassion, ST = Perceived Stress, EC = Engagement Coping, DC = Disengagement Coping, CWB = Cognitive Well-Being.

\*\*\* $p < 0.001$ ; \*\* $p < 0.01$ ; +  $p < 0.10$ .

**Table S7**

*Indirect effects of self-compassion on cognitive well-being via perceived stress and coping*

|                        | Estimate | Standard Error | 95% CI          |
|------------------------|----------|----------------|-----------------|
| SC-T1 → ST-T2 → CWB-T3 | 0.094*   | 0.031          | [0.044, 0.168]  |
| SC-T1 → AC-T2 → CWB-T3 | -0.021   | 0.042          | [-0.110, 0.059] |
| SC-T1 → MC-T2 → CWB-T3 | 0.007    | 0.010          | [-0.003, 0.039] |

*Notes.* CI = Confidence interval; SC = Self-Compassion, ST = Stress, EC = Engagement Coping, DC = Disengagement Coping, CWB = Cognitive Well-Being.

\* $p < 0.001$ .

**Table S8***Cross-lagged and autoregressive effects among SC, perceived stress, coping, and AWB (Study 1)*

|                             | Estimate        | Standard Error | 95% CI                  |
|-----------------------------|-----------------|----------------|-------------------------|
| <b>Cross-lagged paths</b>   |                 |                |                         |
| <b>SC-T1 → ST-T2</b>        | <b>-0.210**</b> | <b>0.071</b>   | <b>[-0.358, -0.080]</b> |
| SC-T2 → ST-T3               | -0.414***       | 0.084          | [-0.583, -0.248]        |
| <b>SC-T1 → EC-T2</b>        | <b>0.032***</b> | <b>0.007</b>   | <b>[0.019, 0.045]</b>   |
| SC-T2 → EC-T3               | 0.019**         | 0.007          | [0.006, 0.033]          |
| <b>SC-T1 → DC-T2</b>        | <b>-0.015**</b> | <b>0.005</b>   | <b>[-0.025, -0.005]</b> |
| SC-T2 → DC-T3               | -0.031***       | 0.005          | [-0.041, -0.021]        |
| SC-T1 → AWB-T3              | 0.026***        | 0.007          | [0.012, 0.042]          |
| SC-T2 → AWB-T3              | 0.015           | 0.010          | [-0.005, 0.033]         |
| <b>ST-T2 → AWB-T3</b>       | <b>-0.010*</b>  | <b>0.004</b>   | <b>[-0.018, -0.001]</b> |
| <b>EC-T2 → AWB-T3</b>       | <b>-0.018</b>   | <b>0.036</b>   | <b>[-0.089, 0.054]</b>  |
| <b>DC-T2 → AWB-T3</b>       | <b>0.018</b>    | <b>0.047</b>   | <b>[-0.074, 0.109]</b>  |
| SC-T1 → AWB-T2              | 0.012*          | 0.007          | [0.000, 0.024]          |
| ST-T1 → AWB-T2              | -0.007          | 0.004          | [-0.015, -0.001]        |
| EC-T1 → AWB-T2              | 0.026           | 0.035          | [-0.041, 0.095]         |
| DC-T1 → AWB-T2              | -0.039          | 0.043          | [-0.123, 0.043]         |
| <b>Autoregressive paths</b> |                 |                |                         |
| SC-T1 → SC-T2               | 0.831***        | 0.025          | [0.782, 0.881]          |
| SC-T1 → SC-T3               | 0.232***        | 0.049          | [0.134, 0.325]          |
| SC-T2 → SC-T3               | 0.715***        | 0.049          | [0.620, 0.814]          |
| ST-T1 → ST-T2               | 0.554***        | 0.040          | [0.473, 0.627]          |
| ST-T1 → ST-T3               | 0.216***        | 0.051          | [0.116, 0.313]          |
| ST-T2 → ST-T3               | 0.423***        | 0.063          | [0.299, 0.548]          |
| EC-T1 → EC-T2               | 0.412***        | 0.041          | [0.329, 0.493]          |
| EC-T1 → EC-T3               | 0.236***        | 0.052          | [0.130, 0.331]          |
| EC-T2 → EC-T3               | 0.386***        | 0.060          | [0.269, 0.502]          |
| DC-T1 → DC-T2               | 0.458***        | 0.044          | [0.369, 0.543]          |
| AWB-T1 → AWB-T2             | 0.523***        | 0.046          | [0.429, 0.610]          |
| AWB-T2 → AWB-T3             | 0.505***        | 0.046          | [0.415, 0.598]          |

*Notes.* In this model autoregressive paths between time intervals of each construct were not restricted to be equal, CI = Confidence interval; SC = Self-compassion, ST = Perceived Stress, EC = Engagement Coping, DC = Disengagement Coping, AWB = Affective Well-Being. Bold font is used for hypotheses relevant paths. Fit indices for this model were comparable to this model we used in our manuscript:  $\chi^2(47) = 110.767$ ; RMSEA = 0.044; CFI = 0.984; SRMR = 0.049. \*\*\* $p < 0.001$ ; \*\* $p < 0.01$ ; \*  $p < 0.05$ ;

**Table S9***Indirect effects of self-compassion on affective well-being via perceived stress and coping (Study 1)*

|                        | Estimate           | Standard Error | 95% CI          |
|------------------------|--------------------|----------------|-----------------|
| SC-T1 → ST-T2 → AWB-T3 | 0.002 <sup>+</sup> | 0.001          | [0.001, 0.005]  |
| SC-T1 → EC-T2 → AWB-T3 | -0.001             | 0.001          | [-0.003, 0.002] |
| SC-T1 → DC-T2 → AWB-T3 | 0.000              | 0.001          | [-0.002, 0.001] |

*Notes.* CI = Confidence interval; SC = Self-compassion, ST = Stress, EC = Engagement Coping, DC =

Disengagement Coping, AWB = Affective Well-being.

<sup>+</sup>  $p < 0.010$ , 90% CI = [0.001, 0.005].



**Table S10***Cross-lagged and autoregressive effects among SC, perceived stress, coping, and AWB (Study 2)*

|                             | Estimate         | Standard Error | 95% CI                  |
|-----------------------------|------------------|----------------|-------------------------|
| <b>Cross-lagged paths</b>   |                  |                |                         |
| <b>SC-T1 → ST-T2</b>        | <b>-1.712***</b> | <b>0.294</b>   | <b>[-2.297, -1.139]</b> |
| SC-T2 → ST-T3               | -0.696*          | 0.290          | [-1.257, -0.127]        |
| <b>SC-T1 → EC-T2</b>        | <b>0.513***</b>  | <b>0.059</b>   | <b>[0.394, 0.625]</b>   |
| SC-T2 → EC-T3               | 0.299***         | 0.056          | [0.186, 0.407]          |
| <b>SC-T1 → DC-T2</b>        | <b>-0.085</b>    | <b>0.057</b>   | <b>[-0.193, 0.029]</b>  |
| SC-T2 → DC-T3               | -0.050           | 0.060          | [-0.165, 0.073]         |
| SC-T1 → AWB-T3              | -0.012           | 0.055          | [-0.119, 0.092]         |
| SC-T2 → AWB-T3              | 0.048            | 0.060          | [-0.069, 0.166]         |
| <b>ST-T2 → AWB-T3</b>       | <b>-0.025***</b> | <b>0.003</b>   | <b>[-0.031, -0.019]</b> |
| <b>EC-T2 → AWB-T3</b>       | <b>0.034*</b>    | <b>0.018</b>   | <b>[0.006, 0.064]</b>   |
| <b>DC-T2 → AWB-T3</b>       | <b>-0.039**</b>  | <b>0.014</b>   | <b>[-0.065, -0.013]</b> |
| SC-T1 → AWB-T2              | 0.206***         | 0.047          | [0.116, 0.303]          |
| ST-T1 → AWB-T2              | -0.017***        | 0.003          | [-0.022, -0.011]        |
| EC-T1 → AWB-T2              | 0.027*           | 0.016          | [0.002, 0.054]          |
| DC-T1 → AWB-T2              | -0.023*          | 0.013          | [-0.045, -0.003]        |
| <b>Autoregressive paths</b> |                  |                |                         |
| SC-T1 → SC-T2               | 0.573***         | 0.013          | [0.548, 0.600]          |
| SC-T1 → SC-T3               | 0.153***         | 0.034          | [0.095, 0.214]          |
| SC-T2 → SC-T3               | 0.573***         | 0.013          | [0.548, 0.600]          |
| ST-T1 → ST-T2               | 0.600***         | 0.014          | [0.573, 0.626]          |
| ST-T1 → ST-T3               | 0.180***         | 0.022          | [0.137, 0.223]          |
| ST-T2 → ST-T3               | 0.600***         | 0.014          | [0.573, 0.626]          |
| EC-T1 → EC-T2               | 0.390***         | 0.017          | [0.356, 0.424]          |
| EC-T1 → EC-T3               | 0.235***         | 0.024          | [0.189, 0.282]          |
| EC-T2 → EC-T3               | 0.390***         | 0.017          | [0.356, 0.424]          |
| DC-T1 → DC-T2               | 0.464***         | 0.014          | [0.436, 0.491]          |
| AWB-T1 → AWB-T2             | 0.586***         | 0.017          | [0.551, 0.619]          |
| AWB-T2 → AWB-T3             | 0.586***         | 0.017          | [0.551, 0.619]          |

*Notes.* In this model autoregressive paths between time intervals of each construct were restricted to be equal, CI = Confidence interval; SC = Self-compassion, ST = Perceived Stress, EC = Engagement Coping, DC = Disengagement Coping, AWB = Affective Well-Being. Bold font is used for hypotheses relevant paths.

\*\*\* $p < 0.001$ ; \*\* $p < 0.01$ ; \* $p < 0.05$ ; Fit indices of this model were less satisfying (only CFI can be seen as acceptable). Thus, results should be interpreted with caution:  $\chi^2(df=48) = 1163.315$ ; RMSEA = 0.089; CFI = 0.933; SRMR = 0.089

**Table S11***Indirect effects of self-compassion on affective well-being via perceived stress and coping (Study 2)*

|                        | Estimate | Standard Error | 95% CI          |
|------------------------|----------|----------------|-----------------|
| SC-T1 → ST-T2 → AWB-T3 | 0.043*** | 0.009          | [0.028, 0.063]  |
| SC-T1 → EC-T2 → AWB-T3 | 0.018*   | 0.009          | [0.001, 0.036]  |
| SC-T1 → DC-T2 → AWB-T3 | 0.003    | 0.003          | [-0.001, 0.010] |

*Notes.* CI = Confidence interval; SC = Self-compassion, ST = Stress, EC = Engagement Coping, DC =

Disengagement Coping, AWB = Affective Well-being. \*\*\* $p < .001$ ; \* $p < .05$ .

**Table S 12***Descriptive Statistics and Missing Value Analysis of Items (Study 1)*

|       | N   | Mean  | SD    | Missings |            |
|-------|-----|-------|-------|----------|------------|
|       |     |       |       | No.      | Percentage |
| Age   | 684 | 27,91 | 9,983 | 7        | 1,0        |
| SC011 | 681 | 2,47  | 1,047 | 10       | 1,4        |
| SC012 | 478 | 2,42  | 1,000 | 213      | 30,8       |
| SC013 | 372 | 2,58  | ,997  | 319      | 46,2       |
| SC021 | 681 | 2,58  | 1,131 | 10       | 1,4        |
| SC022 | 478 | 2,53  | 1,027 | 213      | 30,8       |
| SC023 | 372 | 2,72  | 1,061 | 319      | 46,2       |
| SC031 | 681 | 3,38  | ,972  | 10       | 1,4        |
| SC032 | 478 | 3,36  | ,912  | 213      | 30,8       |
| SC033 | 372 | 3,27  | ,944  | 319      | 46,2       |
| SC041 | 681 | 3,07  | 1,236 | 10       | 1,4        |
| SC042 | 478 | 3,10  | 1,182 | 213      | 30,8       |
| SC043 | 372 | 3,23  | 1,133 | 319      | 46,2       |
| SC051 | 681 | 3,13  | 1,066 | 10       | 1,4        |
| SC052 | 478 | 3,21  | 1,036 | 213      | 30,8       |
| SC053 | 372 | 3,25  | 1,032 | 319      | 46,2       |
| SC061 | 681 | 2,70  | 1,152 | 10       | 1,4        |
| SC062 | 477 | 2,66  | 1,104 | 214      | 31,0       |
| SC063 | 372 | 2,73  | 1,120 | 319      | 46,2       |
| SC071 | 681 | 2,78  | 1,120 | 10       | 1,4        |
| SC072 | 478 | 2,91  | 1,064 | 213      | 30,8       |
| SC073 | 372 | 2,84  | 1,093 | 319      | 46,2       |
| SC081 | 681 | 2,71  | 1,100 | 10       | 1,4        |
| SC082 | 478 | 2,71  | 1,059 | 213      | 30,8       |
| SC083 | 372 | 2,78  | 1,050 | 319      | 46,2       |
| SC091 | 681 | 3,32  | 1,038 | 10       | 1,4        |
| SC092 | 478 | 3,31  | ,987  | 213      | 30,8       |
| SC093 | 372 | 3,34  | ,952  | 319      | 46,2       |

|       |     |      |       |     |      |
|-------|-----|------|-------|-----|------|
| SC101 | 681 | 2,62 | 1,069 | 10  | 1,4  |
| SC102 | 478 | 2,74 | 1,080 | 213 | 30,8 |
| SC103 | 372 | 2,65 | 1,050 | 319 | 46,2 |
| SC111 | 681 | 3,10 | 1,146 | 10  | 1,4  |
| SC112 | 478 | 2,94 | 1,077 | 213 | 30,8 |
| SC113 | 372 | 3,00 | 1,100 | 319 | 46,2 |
| SC121 | 681 | 2,90 | 1,063 | 10  | 1,4  |
| SC122 | 478 | 2,98 | ,996  | 213 | 30,8 |
| SC123 | 372 | 3,00 | ,964  | 319 | 46,2 |
| SC131 | 681 | 3,16 | 1,278 | 10  | 1,4  |
| SC132 | 478 | 3,23 | 1,224 | 213 | 30,8 |
| SC133 | 372 | 3,26 | 1,218 | 319 | 46,2 |
| SC141 | 681 | 3,58 | ,947  | 10  | 1,4  |
| SC142 | 478 | 3,47 | ,910  | 213 | 30,8 |
| SC143 | 372 | 3,52 | ,921  | 319 | 46,2 |
| SC151 | 681 | 3,28 | 1,142 | 10  | 1,4  |
| SC152 | 478 | 3,21 | 1,032 | 213 | 30,8 |
| SC153 | 372 | 3,23 | 1,053 | 319 | 46,2 |
| SC161 | 681 | 2,84 | 1,094 | 10  | 1,4  |
| SC162 | 478 | 2,86 | 1,129 | 213 | 30,8 |
| SC163 | 372 | 2,90 | 1,081 | 319 | 46,2 |
| SC171 | 681 | 3,11 | 1,044 | 10  | 1,4  |
| SC172 | 477 | 2,97 | ,968  | 214 | 31,0 |
| SC173 | 372 | 3,05 | ,955  | 319 | 46,2 |
| SC181 | 681 | 3,37 | 1,200 | 10  | 1,4  |
| SC182 | 478 | 3,28 | 1,165 | 213 | 30,8 |
| SC183 | 372 | 3,31 | 1,130 | 319 | 46,2 |
| SC191 | 681 | 3,11 | ,986  | 10  | 1,4  |
| SC192 | 478 | 3,13 | ,962  | 213 | 30,8 |
| SC193 | 372 | 3,16 | 1,006 | 319 | 46,2 |
| SC201 | 681 | 2,63 | 1,123 | 10  | 1,4  |
| SC202 | 478 | 2,64 | 1,114 | 213 | 30,8 |
| SC203 | 372 | 2,72 | 1,104 | 319 | 46,2 |
| SC211 | 681 | 3,22 | 1,126 | 10  | 1,4  |
| SC212 | 477 | 3,18 | 1,054 | 214 | 31,0 |
| SC213 | 372 | 3,17 | 1,101 | 319 | 46,2 |
| SC221 | 681 | 2,84 | 1,101 | 10  | 1,4  |
| SC222 | 477 | 2,83 | 1,018 | 214 | 31,0 |
| SC223 | 372 | 2,89 | 1,030 | 319 | 46,2 |
| SC231 | 681 | 3,10 | 1,087 | 10  | 1,4  |
| SC232 | 478 | 3,08 | 1,059 | 213 | 30,8 |
| SC233 | 372 | 3,10 | 1,063 | 319 | 46,2 |
| SC241 | 681 | 3,25 | 1,110 | 10  | 1,4  |
| SC242 | 478 | 3,22 | 1,094 | 213 | 30,8 |

|         |     |      |       |     |      |
|---------|-----|------|-------|-----|------|
| SC243   | 372 | 3,32 | 1,112 | 319 | 46,2 |
| SC251   | 681 | 3,15 | 1,231 | 10  | 1,4  |
| SC252   | 478 | 3,24 | 1,237 | 213 | 30,8 |
| SC253   | 372 | 3,25 | 1,241 | 319 | 46,2 |
| SC261   | 681 | 3,00 | 1,000 | 10  | 1,4  |
| SC262   | 478 | 3,00 | ,972  | 213 | 30,8 |
| SC263   | 372 | 2,97 | ,953  | 319 | 46,2 |
| PS011   | 679 | 3,01 | ,852  | 12  | 1,7  |
| PS012   | 472 | 2,91 | ,869  | 219 | 31,7 |
| PS013   | 361 | 2,80 | ,916  | 330 | 47,8 |
| PS021   | 679 | 3,10 | 1,079 | 12  | 1,7  |
| PS022   | 472 | 2,98 | 1,073 | 219 | 31,7 |
| PS023   | 361 | 2,83 | 1,071 | 330 | 47,8 |
| PS031   | 679 | 3,65 | ,992  | 12  | 1,7  |
| PS032   | 471 | 3,57 | ,980  | 220 | 31,8 |
| PS033   | 361 | 3,38 | 1,018 | 330 | 47,8 |
| PS041   | 679 | 3,53 | ,861  | 12  | 1,7  |
| PS042   | 472 | 3,55 | ,818  | 219 | 31,7 |
| PS043   | 361 | 3,62 | ,871  | 330 | 47,8 |
| PS051   | 679 | 3,16 | ,990  | 12  | 1,7  |
| PS052   | 472 | 3,22 | ,972  | 219 | 31,7 |
| PS053   | 361 | 3,29 | ,996  | 330 | 47,8 |
| PS061   | 679 | 3,16 | 1,076 | 12  | 1,7  |
| PS062   | 472 | 3,01 | 1,099 | 219 | 31,7 |
| PS063   | 361 | 2,96 | 1,070 | 330 | 47,8 |
| PS071   | 679 | 3,51 | ,762  | 12  | 1,7  |
| PS072   | 472 | 3,59 | ,749  | 219 | 31,7 |
| PS073   | 361 | 3,66 | ,794  | 330 | 47,8 |
| PS081   | 677 | 3,37 | ,822  | 14  | 2,0  |
| PS082   | 472 | 3,42 | ,851  | 219 | 31,7 |
| PS083   | 361 | 3,49 | ,817  | 330 | 47,8 |
| PS091   | 679 | 3,26 | ,979  | 12  | 1,7  |
| PS092   | 472 | 3,22 | ,989  | 219 | 31,7 |
| PS093   | 361 | 3,17 | 1,044 | 330 | 47,8 |
| PS101   | 679 | 3,07 | 1,146 | 12  | 1,7  |
| PS102   | 472 | 2,94 | 1,147 | 219 | 31,7 |
| PS103   | 361 | 2,73 | 1,152 | 330 | 47,8 |
| CODIS11 | 670 | 2,56 | ,884  | 21  | 3,0  |
| CODIS12 | 465 | 2,50 | ,915  | 226 | 32,7 |
| CODIS13 | 352 | 2,51 | ,806  | 339 | 49,1 |
| COACT11 | 670 | 2,70 | ,785  | 21  | 3,0  |
| COACT12 | 465 | 2,73 | ,814  | 226 | 32,7 |
| COACT13 | 353 | 2,75 | ,790  | 338 | 48,9 |
| CODEN11 | 670 | 1,32 | ,658  | 21  | 3,0  |

|         |     |      |       |     |      |
|---------|-----|------|-------|-----|------|
| CODEN12 | 465 | 1,36 | ,691  | 226 | 32,7 |
| CODEN13 | 353 | 1,27 | ,539  | 338 | 48,9 |
| COBeD11 | 670 | 1,52 | ,706  | 21  | 3,0  |
| COBeD12 | 465 | 1,55 | ,726  | 226 | 32,7 |
| COBeD13 | 353 | 1,60 | ,693  | 338 | 48,9 |
| COACT21 | 670 | 2,72 | ,850  | 21  | 3,0  |
| COACT22 | 465 | 2,81 | ,804  | 226 | 32,7 |
| COACT23 | 353 | 2,81 | ,834  | 338 | 48,9 |
| CODEN21 | 670 | 1,59 | ,856  | 21  | 3,0  |
| CODEN22 | 465 | 1,58 | ,813  | 226 | 32,7 |
| CODEN23 | 353 | 1,54 | ,801  | 338 | 48,9 |
| COPR11  | 670 | 2,60 | ,875  | 21  | 3,0  |
| COPR12  | 465 | 2,63 | ,843  | 226 | 32,7 |
| COPR13  | 353 | 2,58 | ,850  | 338 | 48,9 |
| COSB11  | 670 | 2,43 | ,917  | 21  | 3,0  |
| COSB12  | 465 | 2,36 | ,897  | 226 | 32,7 |
| COSB13  | 353 | 2,28 | ,906  | 338 | 48,9 |
| COBeD21 | 670 | 1,40 | ,690  | 21  | 3,0  |
| COBeD22 | 465 | 1,40 | ,672  | 226 | 32,7 |
| COBeD23 | 354 | 1,33 | ,625  | 337 | 48,8 |
| COPR21  | 670 | 2,55 | ,957  | 21  | 3,0  |
| COPR22  | 465 | 2,47 | ,935  | 226 | 32,7 |
| COPR23  | 354 | 2,37 | ,934  | 337 | 48,8 |
| CODIS21 | 670 | 2,67 | ,856  | 21  | 3,0  |
| CODIS22 | 465 | 2,68 | ,836  | 226 | 32,7 |
| CODIS23 | 354 | 2,64 | ,864  | 337 | 48,8 |
| COACC11 | 670 | 2,50 | ,895  | 21  | 3,0  |
| COACC12 | 465 | 2,41 | ,876  | 226 | 32,7 |
| COACC13 | 354 | 2,42 | ,916  | 337 | 48,8 |
| COACC21 | 670 | 2,54 | ,853  | 21  | 3,0  |
| COACC22 | 465 | 2,52 | ,846  | 226 | 32,7 |
| COACC23 | 354 | 2,47 | ,832  | 337 | 48,8 |
| COOSB21 | 670 | 2,30 | ,915  | 21  | 3,0  |
| COOSB22 | 464 | 2,31 | ,966  | 227 | 32,9 |
| COOSB23 | 354 | 2,16 | ,882  | 337 | 48,8 |
| PN011   | 670 | 3,33 | ,961  | 21  | 3,0  |
| PN012   | 460 | 3,35 | ,957  | 231 | 33,4 |
| PN013   | 350 | 3,46 | ,884  | 341 | 49,3 |
| PN021   | 670 | 2,61 | 1,090 | 21  | 3,0  |
| PN022   | 460 | 2,53 | 1,099 | 231 | 33,4 |
| PN023   | 350 | 2,45 | 1,098 | 341 | 49,3 |
| PN031   | 670 | 3,98 | ,872  | 21  | 3,0  |
| PN032   | 459 | 3,92 | ,889  | 232 | 33,6 |
| PN033   | 350 | 3,93 | ,860  | 341 | 49,3 |

|       |     |      |       |     |      |
|-------|-----|------|-------|-----|------|
| PN041 | 670 | 3,24 | 1,029 | 21  | 3,0  |
| PN042 | 460 | 3,26 | 1,015 | 231 | 33,4 |
| PN043 | 350 | 3,26 | ,993  | 341 | 49,3 |
| PN051 | 670 | 2,21 | 1,056 | 21  | 3,0  |
| PN052 | 460 | 2,15 | 1,048 | 231 | 33,4 |
| PN053 | 350 | 2,12 | 1,019 | 341 | 49,3 |
| PN061 | 670 | 3,24 | 1,051 | 21  | 3,0  |
| PN062 | 460 | 3,24 | 1,029 | 231 | 33,4 |
| PN063 | 350 | 3,28 | ,999  | 341 | 49,3 |
| PN071 | 670 | 2,11 | 1,135 | 21  | 3,0  |
| PN072 | 460 | 2,05 | 1,134 | 231 | 33,4 |
| PN073 | 350 | 1,93 | 1,057 | 341 | 49,3 |
| PN081 | 670 | 1,76 | ,959  | 21  | 3,0  |
| PN082 | 460 | 1,68 | ,900  | 231 | 33,4 |
| PN083 | 350 | 1,71 | ,924  | 341 | 49,3 |
| PN091 | 670 | 1,62 | ,899  | 21  | 3,0  |
| PN092 | 460 | 1,58 | ,832  | 231 | 33,4 |
| PN093 | 350 | 1,61 | ,875  | 341 | 49,3 |
| PN101 | 670 | 3,01 | 1,050 | 21  | 3,0  |
| PN102 | 460 | 2,99 | 1,041 | 231 | 33,4 |
| PN103 | 349 | 3,05 | 1,042 | 342 | 49,5 |
| PN111 | 669 | 2,83 | 1,135 | 22  | 3,2  |
| PN112 | 460 | 2,90 | 1,132 | 231 | 33,4 |
| PN113 | 350 | 2,90 | 1,078 | 341 | 49,3 |
| PN121 | 670 | 2,47 | 1,082 | 21  | 3,0  |
| PN122 | 460 | 2,38 | 1,085 | 231 | 33,4 |
| PN123 | 350 | 2,37 | 1,037 | 341 | 49,3 |
| PN131 | 670 | 3,33 | 1,079 | 21  | 3,0  |
| PN132 | 460 | 3,32 | 1,101 | 231 | 33,4 |
| PN133 | 350 | 3,39 | 1,109 | 341 | 49,3 |
| PN141 | 670 | 2,01 | 1,080 | 21  | 3,0  |
| PN142 | 460 | 2,01 | 1,144 | 231 | 33,4 |
| PN143 | 350 | 1,85 | 1,066 | 341 | 49,3 |
| PN151 | 670 | 2,96 | 1,026 | 21  | 3,0  |
| PN152 | 460 | 3,05 | ,972  | 231 | 33,4 |
| PN153 | 350 | 3,07 | 1,004 | 341 | 49,3 |
| PN161 | 670 | 2,61 | 1,136 | 21  | 3,0  |
| PN162 | 460 | 2,63 | 1,161 | 231 | 33,4 |
| PN163 | 350 | 2,51 | 1,162 | 341 | 49,3 |
| PN171 | 670 | 3,39 | 1,076 | 21  | 3,0  |
| PN172 | 460 | 3,42 | 1,058 | 231 | 33,4 |
| PN173 | 350 | 3,41 | 1,071 | 341 | 49,3 |
| PN181 | 670 | 3,62 | ,925  | 21  | 3,0  |
| PN182 | 460 | 3,58 | ,948  | 231 | 33,4 |

|       |     |      |       |     |      |
|-------|-----|------|-------|-----|------|
| PN183 | 350 | 3,64 | ,925  | 341 | 49,3 |
| PN191 | 670 | 2,71 | 1,230 | 21  | 3,0  |
| PN192 | 460 | 2,60 | 1,209 | 231 | 33,4 |
| PN193 | 350 | 2,49 | 1,152 | 341 | 49,3 |
| PN201 | 670 | 2,43 | 1,200 | 21  | 3,0  |
| PN202 | 460 | 2,35 | 1,168 | 231 | 33,4 |
| PN203 | 350 | 2,25 | 1,119 | 341 | 49,3 |
| NE041 | 682 | 3,28 | 1,126 | 9   | 1,3  |
| NE042 | 510 | 3,23 | 1,057 | 181 | 26,2 |
| NE043 | 395 | 3,26 | 1,047 | 296 | 42,8 |
| NE091 | 682 | 3,29 | 1,161 | 9   | 1,3  |
| NE092 | 510 | 3,29 | 1,104 | 181 | 26,2 |
| NE093 | 395 | 3,26 | 1,167 | 296 | 42,8 |

Notes. SC = self-compassion items, PS = perceived stress items, CO = coping items,

PN = affect items, NE = neuroticism items

**Table 13**

*Descriptive Statistics and Missing Value Analysis of Items (Study 2)*

|         | N    | Mean  | SD     | Missing |            |
|---------|------|-------|--------|---------|------------|
|         |      |       |        | No.     | Percentage |
| Age     | 2594 | 52,76 | 13,065 | 340     | 11,6       |
| SCt1i1  | 2773 | 3,42  | ,987   | 161     | 5,5        |
| SCt1i2  | 2748 | 3,06  | ,810   | 186     | 6,3        |
| SCt1i3  | 2768 | 3,68  | ,773   | 166     | 5,7        |
| SCt1i4  | 2760 | 3,60  | 1,028  | 174     | 5,9        |
| SCt1i5  | 2760 | 2,99  | ,964   | 174     | 5,9        |
| SCt1i6  | 2753 | 2,93  | ,971   | 181     | 6,2        |
| SCt1i7  | 2773 | 3,32  | ,838   | 161     | 5,5        |
| SCt1i8  | 2764 | 3,59  | ,993   | 170     | 5,8        |
| SCt1i9  | 2760 | 3,50  | ,994   | 174     | 5,9        |
| SCt1i10 | 2750 | 2,43  | ,972   | 184     | 6,3        |
| SCt1i11 | 2751 | 3,20  | 1,023  | 183     | 6,2        |
| SCt1i12 | 2748 | 3,29  | ,958   | 186     | 6,3        |
| SCt2i1  | 2697 | 3,54  | 1,028  | 237     | 8,1        |
| SCt2i2  | 2673 | 3,02  | ,842   | 261     | 8,9        |
| SCt2i3  | 2687 | 3,68  | ,791   | 247     | 8,4        |
| SCt2i4  | 2685 | 3,70  | 1,027  | 249     | 8,5        |
| SCt2i5  | 2683 | 3,00  | ,959   | 251     | 8,6        |
| SCt2i6  | 2684 | 2,92  | ,956   | 250     | 8,5        |
| SCt2i7  | 2688 | 3,31  | ,819   | 246     | 8,4        |
| SCt2i8  | 2680 | 3,70  | 1,000  | 254     | 8,7        |
| SCt2i9  | 2680 | 3,54  | 1,011  | 254     | 8,7        |
| SCt2i10 | 2676 | 2,39  | ,975   | 258     | 8,8        |

|         |      |      |       |     |     |
|---------|------|------|-------|-----|-----|
| SCt2i11 | 2680 | 3,27 | 1,045 | 254 | 8,7 |
| SCt2i12 | 2661 | 3,34 | ,966  | 273 | 9,3 |
| SCt3i1  | 2664 | 3,65 | ,981  | 270 | 9,2 |
| SCt3i2  | 2644 | 3,13 | ,831  | 290 | 9,9 |
| SCt3i3  | 2658 | 3,73 | ,754  | 276 | 9,4 |
| SCt3i4  | 2658 | 3,72 | 1,004 | 276 | 9,4 |
| SCt3i5  | 2660 | 3,13 | ,958  | 274 | 9,3 |
| SCt3i6  | 2659 | 2,99 | ,937  | 275 | 9,4 |
| SCt3i7  | 2661 | 3,37 | ,793  | 273 | 9,3 |
| SCt3i8  | 2663 | 3,77 | ,968  | 271 | 9,2 |
| SCt3i9  | 2660 | 3,64 | ,974  | 274 | 9,3 |
| SCt3i10 | 2648 | 2,39 | ,988  | 286 | 9,7 |
| SCt3i11 | 2661 | 3,31 | 1,031 | 273 | 9,3 |
| SCt3i12 | 2650 | 3,38 | ,968  | 284 | 9,7 |
| Strt1i1 | 2783 | 2,52 | ,864  | 151 | 5,1 |
| Strt1i2 | 2781 | 2,92 | ,894  | 153 | 5,2 |
| Strt1i3 | 2776 | 3,62 | ,760  | 158 | 5,4 |
| Strt1i4 | 2777 | 3,33 | ,821  | 157 | 5,4 |
| Strt1i5 | 2782 | 2,38 | ,961  | 152 | 5,2 |
| Strt2i1 | 2698 | 2,49 | ,901  | 236 | 8,0 |
| Strt2i2 | 2699 | 2,98 | ,933  | 235 | 8,0 |
| Strt2i3 | 2698 | 3,61 | ,751  | 236 | 8,0 |
| Strt2i4 | 2700 | 3,31 | ,837  | 234 | 8,0 |
| Strt2i5 | 2697 | 2,33 | ,968  | 237 | 8,1 |
| Strt3i1 | 2660 | 2,40 | ,897  | 274 | 9,3 |
| Strt3i2 | 2657 | 2,95 | ,921  | 277 | 9,4 |
| Strt3i3 | 2657 | 3,70 | ,742  | 277 | 9,4 |
| Strt3i4 | 2658 | 3,44 | ,814  | 276 | 9,4 |
| Strt3i5 | 2666 | 2,28 | ,949  | 268 | 9,1 |
| COPt1i1 | 2758 | 1,72 | ,705  | 176 | 6,0 |
| COPt1i2 | 2752 | 2,00 | ,755  | 182 | 6,2 |
| COPt1i3 | 2753 | 2,06 | ,801  | 181 | 6,2 |
| COPt1i4 | 2752 | 2,86 | ,634  | 182 | 6,2 |
| COPt1i5 | 2741 | 1,71 | ,699  | 193 | 6,6 |
| COPt1i6 | 2752 | 2,78 | ,674  | 182 | 6,2 |
| COPt1i7 | 2753 | 2,71 | ,720  | 181 | 6,2 |
| COPt1i8 | 2752 | 2,90 | ,663  | 182 | 6,2 |
| COPt2i1 | 2684 | 1,67 | ,703  | 250 | 8,5 |
| COPt2i2 | 2672 | 1,98 | ,781  | 262 | 8,9 |
| COPt2i3 | 2660 | 2,03 | ,800  | 274 | 9,3 |
| COPt2i4 | 2674 | 2,86 | ,636  | 260 | 8,9 |
| COPt2i5 | 2668 | 1,62 | ,676  | 266 | 9,1 |
| COPt2i6 | 2677 | 2,76 | ,692  | 257 | 8,8 |
| COPt2i7 | 2667 | 2,66 | ,749  | 267 | 9,1 |



|         |      |       |       |     |      |
|---------|------|-------|-------|-----|------|
| COPt2i8 | 2673 | 2,87  | ,684  | 261 | 8,9  |
| COPt3i1 | 2652 | 1,74  | ,711  | 282 | 9,6  |
| COPt3i2 | 2647 | 1,95  | ,751  | 287 | 9,8  |
| COPt3i3 | 2647 | 2,02  | ,794  | 287 | 9,8  |
| COPt3i4 | 2635 | 2,89  | ,624  | 299 | 10,2 |
| COPt3i5 | 2645 | 1,62  | ,672  | 289 | 9,9  |
| COPt3i6 | 2634 | 2,78  | ,681  | 300 | 10,2 |
| COPt3i7 | 2644 | 2,65  | ,757  | 290 | 9,9  |
| COPt3i8 | 2641 | 2,88  | ,666  | 293 | 10,0 |
| CWBt1i1 | 2781 | 4,52  | 1,229 | 153 | 5,2  |
| CWBt1i2 | 2779 | 5,00  | 1,180 | 155 | 5,3  |
| CWBt1i3 | 2786 | 4,94  | 1,260 | 148 | 5,0  |
| CWB1    | 2768 | 14,47 | 3,342 | 166 | 5,7  |
| CWBt2i1 | 2701 | 4,50  | 1,226 | 233 | 7,9  |
| CWBt2i2 | 2710 | 4,98  | 1,191 | 224 | 7,6  |
| CWBt2i3 | 2701 | 4,90  | 1,284 | 233 | 7,9  |
| CWB2    | 2688 | 14,38 | 3,379 | 246 | 8,4  |
| CWBt3i1 | 2672 | 4,63  | 1,252 | 262 | 8,9  |
| CWBt3i2 | 2670 | 5,06  | 1,183 | 264 | 9,0  |
| CWBt3i3 | 2673 | 5,03  | 1,254 | 261 | 8,9  |
| PNt1i1  | 2771 | 3,32  | ,852  | 163 | 5,6  |
| PNt1i2  | 2758 | 2,77  | ,884  | 176 | 6,0  |
| PNt1i3  | 2759 | 3,40  | ,905  | 175 | 6,0  |
| PNt1i4  | 2762 | 3,41  | ,922  | 172 | 5,9  |
| PNt1i5  | 2756 | 3,69  | ,825  | 178 | 6,1  |
| PNt1i1  | 2769 | 1,97  | ,879  | 165 | 5,6  |
| PNt1i2  | 2760 | 1,46  | ,795  | 174 | 5,9  |
| PNt1i3  | 2763 | 1,49  | ,765  | 171 | 5,8  |
| PNt1i4  | 2761 | 1,94  | ,923  | 173 | 5,9  |
| PNt1i5  | 2770 | 1,79  | ,892  | 164 | 5,6  |
| PNt2i1  | 2698 | 3,28  | ,850  | 236 | 8,0  |
| PNt2i2  | 2680 | 2,73  | ,878  | 254 | 8,7  |
| PNt2i3  | 2672 | 3,38  | ,903  | 262 | 8,9  |
| PNt2i4  | 2692 | 3,42  | ,909  | 242 | 8,2  |
| PNt2i5  | 2690 | 3,69  | ,811  | 244 | 8,3  |
| PNt2i1  | 2689 | 1,93  | ,870  | 245 | 8,4  |
| PNt2i2  | 2694 | 1,43  | ,777  | 240 | 8,2  |
| PNt2i3  | 2678 | 1,43  | ,728  | 256 | 8,7  |
| PNt2i4  | 2685 | 1,96  | ,931  | 249 | 8,5  |
| PNt2i5  | 2696 | 1,77  | ,888  | 238 | 8,1  |
| PNt3i1  | 2658 | 3,33  | ,853  | 276 | 9,4  |
| PNt3i2  | 2640 | 2,86  | ,904  | 294 | 10,0 |
| PNt3i3  | 2640 | 3,41  | ,896  | 294 | 10,0 |
| PNt3i4  | 2655 | 3,52  | ,898  | 279 | 9,5  |

|        |      |      |      |     |      |
|--------|------|------|------|-----|------|
| PNt3i5 | 2645 | 3,74 | ,808 | 289 | 9,9  |
| PNt3i1 | 2652 | 1,91 | ,860 | 282 | 9,6  |
| PNt3i2 | 2654 | 1,43 | ,759 | 280 | 9,5  |
| PNt3i3 | 2653 | 1,45 | ,741 | 281 | 9,6  |
| PAt3i4 | 2640 | 1,95 | ,932 | 294 | 10,0 |
| PAt3i5 | 2657 | 1,74 | ,865 | 277 | 9,4  |

Notes. SC = self-compassion items, Str = perceived stress items, COP = coping items,

CWB = cognitive well-being, PN = affect items, NE = neuroticism items
