# Supplementary material for: Stress Perception and Coping as Mediators of the Link Between Self-Compassion and Affective Well-being? Evidence From Two Longitudinal Studies
Source: Springer Nature journal article supplement (doi:10.1007/s12671-023-02295-1), 2024-01-17
Supplement: MOESM3 [file 26634282]

           1           1          22           7           3           0       15.60       16.05       99.00          24          20          99         3.0         1.0        99.0         4.0         3.0        99.0         2.5         2.0        99.0         2.0         1.0        99.0         1.5         2.0        99.0         2.5         2.5        99.0    2.67    2.33   99.00    2.50    1.50   99.00         3.7         3.3        99.0         3.8         2.1        99.0        2.95        3.60       99.00         4.0         4.0        99.0         3.0         3.0        99.0
           2           1          22           7           3           0       16.60       25.75       23.90          29          12          10         1.0         1.5         1.0         1.5         3.0         4.0         2.5         3.0         2.5         3.0         1.0         1.5         1.5         4.0         3.5         3.5         2.0         2.0    1.83    3.33    3.33    2.50    1.50    1.50         1.8         3.8         4.0         2.4         1.3         1.2        2.70        4.25        4.40         4.0         3.0         2.5         2.0         3.5         3.0
           3           1          21           7           3           0       21.65       18.75       17.85          11          15          12         1.0         1.5         1.0         3.5         3.0         3.0         4.0         4.0         3.5         1.0         1.5         1.0         3.0         2.0         2.5         3.5         2.5         2.5    3.50    3.00    3.00    1.83    1.83    1.50         4.0         3.3         3.7         1.2         1.5         1.5        4.40        3.90        4.10         3.0         3.0         3.5         3.0         3.0         3.5
           4           1          21           7           3           0       11.80       14.45       13.85          17          14          12         1.5         1.5         1.0         3.5         4.0         3.5         2.0         4.0         3.0         1.0         1.5         1.0         3.0         1.5         2.5         4.0         3.0         1.5    2.83    3.17    3.00    2.17    2.00    1.17         4.2         4.1         4.1         2.4         1.6         2.1        3.90        4.25        4.00         4.5         4.0         3.0         4.0         4.0         3.5
           5           1          21           7           2          99       12.25       99.00       99.00          29          99          99         2.0        99.0        99.0         2.5        99.0        99.0         2.5        99.0        99.0         2.0        99.0        99.0         2.5        99.0        99.0         3.0        99.0        99.0    2.50   99.00   99.00    2.33   99.00   99.00         2.4        99.0        99.0         3.3        99.0        99.0        2.55       99.00       99.00         3.5         3.5        99.0         2.0         1.5        99.0
           6           1          29           8           3           0       15.85       99.00       99.00          29          99          99         2.0        99.0        99.0         2.0        99.0        99.0         2.0        99.0        99.0         1.0        99.0        99.0         2.5        99.0        99.0         4.0        99.0        99.0    2.17   99.00   99.00    2.33   99.00   99.00         3.7        99.0        99.0         3.0        99.0        99.0        3.35       99.00       99.00         3.5        99.0        99.0         2.0        99.0        99.0
           7           1          29           8           7          99       15.15       15.85       99.00          28          28          99         1.5         1.5        99.0         2.0         2.0        99.0         2.0         2.0        99.0         1.5         1.5        99.0         2.5         2.0        99.0         3.5         3.0        99.0    2.17    2.00   99.00    2.17    2.00   99.00         2.7         2.7        99.0         3.0         3.0        99.0        2.85        2.85       99.00         5.0         5.0        99.0         4.5         4.5        99.0
           8           2          34           8           5          99       19.20       20.35       17.55          22          12          19         1.0         1.0         1.0         3.0         3.5         3.0         4.0         2.0         3.5         2.5         2.0         2.0         2.5         2.0         1.0         3.0         3.5         2.5    3.17    2.50    2.50    2.17    2.17    1.83         2.9         3.4         2.2         3.0         1.6         2.3        2.95        3.90        2.95         3.5         2.5         3.5         1.5         1.5         1.5
           9           2          26           8           3           0       17.90       16.15       13.85          21          18          14         2.5         1.5         1.0         2.5         4.0         3.0         1.5         1.5         2.0         1.0         1.0         1.0         1.0         1.5         1.5         3.5         3.5         2.0    1.67    2.33    2.17    2.33    2.00    1.33         3.5         3.2         3.6         3.3         2.3         1.5        3.10        3.45        4.05         4.0         4.0         4.0         2.0         2.0         2.0
          10           1          23           7           3           0       15.00       99.00       99.00          36          99          99         1.0        99.0        99.0         1.5        99.0        99.0         1.5        99.0        99.0         3.5        99.0        99.0         1.0        99.0        99.0         2.5        99.0        99.0    1.33   99.00   99.00    2.33   99.00   99.00         1.4        99.0        99.0         3.4        99.0        99.0        2.00       99.00       99.00         1.5        99.0        99.0         1.5        99.0        99.0
          11           2          21           7           3           0       17.40       17.70       16.30          24          28          26         1.0         1.0         1.0         2.5         2.0         2.0         2.5         2.0         2.0         2.0         2.0         1.5         2.0         1.5         1.5         2.5         3.0         2.0    2.33    1.83    1.83    1.83    2.00    1.50         3.1         3.2         3.2         1.9         2.1         2.6        3.60        3.55        3.30         2.5         2.5         2.5         2.0         3.0         2.5
          12           1          22           7           3           1       26.45       99.00       99.00          15          99          99         1.0        99.0        99.0         3.0        99.0        99.0         3.5        99.0        99.0         1.0        99.0        99.0         2.5        99.0        99.0         1.5        99.0        99.0    3.00   99.00   99.00    1.17   99.00   99.00         4.2        99.0        99.0         1.6        99.0        99.0        4.30       99.00       99.00         2.0        99.0        99.0         4.5        99.0        99.0
          13           2          27           7           3           0       11.00        9.70       11.55          36          34          32         1.0         2.5         2.0         2.0         2.5         2.0         1.5         1.5         4.0         1.0         1.0         1.0         1.0         1.0         1.0         2.5         3.5         3.5    1.50    1.67    2.33    1.50    2.33    2.17         2.5         2.8         3.4         4.1         4.8         4.2        2.20        2.00        2.60         4.5         5.0         4.5         2.5         2.5         2.5
          14           2          26           7           3           0       21.55       21.85       22.30          12          12           9         1.0         1.0         1.0         2.5         3.0         4.0         2.5         3.0         2.0         1.5         1.0         1.0         2.5         3.5         3.0         1.5         1.5         1.5    2.50    3.17    3.00    1.33    1.17    1.17         3.6         4.0         3.8         1.8         2.1         1.7        3.90        3.95        4.05         2.5         2.0         2.0         4.0         2.5         3.0
          15           2          23           7           3           0       21.15       16.90       99.00          27          29          99         1.0         2.0        99.0         2.0         2.0        99.0         3.5         2.0        99.0         2.0         1.5        99.0         4.0         2.0        99.0         1.5         2.0        99.0    3.17    2.00   99.00    1.50    1.83   99.00         2.7        99.0        99.0         2.3        99.0        99.0        3.20       99.00       99.00         1.5         2.0        99.0         1.5         2.0        99.0
          16           1          20           7           3           0       18.30       15.45       15.05          21          19          32         1.5         1.5         2.0         4.0         3.5         3.5         1.0         2.0         2.0         1.0         1.0         1.0         2.5         2.5         3.0         3.5         3.0         4.0    2.50    2.67    2.83    2.00    1.83    2.33         2.9         3.6        99.0         2.1         1.9        99.0        3.40        3.85       99.00         3.0         2.0         2.5         3.5         3.5         4.0
          17           1          35           8           4          99       20.90       21.80       22.75          16          11           8         1.0         1.5         1.0         2.0         3.0         1.5         1.0         2.0         1.0         1.0         1.0         1.5         2.0         3.0         2.5         2.0         2.0         2.0    1.67    2.67    1.67    1.33    1.50    1.50         3.1         3.7         3.9         1.9         1.5         1.7        3.60        4.10        4.10         3.0         2.5         2.0         4.0         4.0         4.0
          18           2          24           4           6          99       21.35       99.00       99.00          18          99          99         1.0        99.0        99.0         2.5        99.0        99.0         3.0        99.0        99.0         1.5        99.0        99.0         2.5        99.0        99.0         1.5        99.0        99.0    2.67   99.00   99.00    1.33   99.00   99.00         3.8        99.0        99.0         1.6        99.0        99.0        4.10       99.00       99.00         1.0        99.0        99.0         2.5        99.0        99.0
          19           1          25           7           3           0       22.35       99.00       99.00          15          99          99         1.5        99.0        99.0         2.5        99.0        99.0         3.0        99.0        99.0         1.5        99.0        99.0         3.0        99.0        99.0         2.5        99.0        99.0    2.83   99.00   99.00    1.83   99.00   99.00         3.2        99.0        99.0         2.7        99.0        99.0        3.25       99.00       99.00         2.5        99.0        99.0         3.5        99.0        99.0
          20           1          24           8           3           0       17.50       16.30       99.00          29          26          99         1.0         1.5        99.0         2.0         3.0        99.0         2.0         1.5        99.0         1.5         1.0        99.0         3.0         2.5        99.0         3.0         3.5        99.0    2.33    2.33   99.00    1.83    2.00   99.00         2.9         3.1        99.0         2.1         2.2        99.0        3.40        3.45       99.00         2.5         3.0        99.0         3.0         3.5        99.0
          21           1          30           6           4          99       12.75       14.65       12.65          24          23          17         1.5         1.0         1.5         2.0         2.0         2.5         3.5         2.0         3.0         1.5         2.0         1.5         4.0         4.0         4.0         3.0         3.5         3.5    3.17    2.67    3.17    2.00    2.17    2.17         2.5         2.3         3.4         3.4         3.9         2.7        2.55        2.20        3.35         4.0         3.5         4.5         3.0         3.0         2.5
          22           1          24           7           3           0       21.30       18.60       99.00          31          34          99         1.0         2.0        99.0         3.5         3.0        99.0         1.5         1.5        99.0         1.0         1.0        99.0         2.5         2.0        99.0         1.0         1.0        99.0    2.50    2.17   99.00    1.00    1.33   99.00         2.9         2.3        99.0         1.7         1.5        99.0        3.60        3.40       99.00         5.0         5.0        99.0         2.5         3.0        99.0
          23           2          27           7           3           0       23.05       99.00       99.00          24          99          99         1.5        99.0        99.0         2.5        99.0        99.0         2.5        99.0        99.0         2.5        99.0        99.0         3.0        99.0        99.0         2.5        99.0        99.0    2.67   99.00   99.00    2.17   99.00   99.00         2.9        99.0        99.0         2.4        99.0        99.0        3.25       99.00       99.00         2.5         3.0        99.0         2.5         3.0        99.0
          24           2          23           7           3           0       18.65       99.00       99.00          99          99          99        99.0        99.0        99.0        99.0        99.0        99.0        99.0        99.0        99.0        99.0        99.0        99.0        99.0        99.0        99.0        99.0        99.0        99.0   99.00   99.00   99.00   99.00   99.00   99.00        99.0        99.0        99.0        99.0        99.0        99.0       99.00       99.00       99.00         2.5        99.0        99.0         2.0        99.0        99.0
          25           1          35           8           4          99       26.85       25.25       26.75          13          11           9         1.0         1.0         1.0         3.5         4.0         3.5         3.5         3.0         3.5         1.0         1.0         1.5         2.0         2.0         2.0         1.0         1.0         1.0    3.00    3.00    3.00    1.00    1.00    1.17         4.1         4.0         4.2         1.2         1.0         1.2        4.45        4.50        4.50         2.0         1.5         1.5         3.5         4.0         3.5
          26           2          23           7           3           0       19.45       17.40       20.35          17          12          10         1.0         2.0         1.0         2.0         2.0         2.0         4.0         4.0         3.5         2.5         4.0         3.5         3.0         3.0         1.5         3.5         3.5         3.5    3.00    3.00    2.33    2.33    3.17    2.67         3.2         3.2         3.3         2.5         2.6         1.8        3.35        3.30        3.75         1.5         1.0         1.0         2.5         2.5         3.0
          27           2          26           7           3           0       15.20       14.25       14.55          21          22          19         3.5         2.5         2.5         2.0         2.0         2.0         3.0         2.0         3.5         2.5         1.5         2.5         1.5         2.5         1.5         3.0         3.0         4.0    2.17    2.17    2.33    3.00    2.33    3.00         3.1         2.9         3.0         2.7         3.1         2.6        3.20        2.90        3.20         4.5         4.5         4.0         3.0         2.5         3.0
          28           2          24           7           3           0       24.25       99.00       99.00           9          99          99         1.0        99.0        99.0         3.0        99.0        99.0         3.5        99.0        99.0         1.0        99.0        99.0         3.5        99.0        99.0         2.0        99.0        99.0    3.33   99.00   99.00    1.33   99.00   99.00         3.7        99.0        99.0         1.9        99.0        99.0        3.90       99.00       99.00         2.5        99.0        99.0         2.5        99.0        99.0
          29           1          21           7           3           0       22.60       24.95       99.00          15          12          99         1.0         2.0        99.0         2.5         3.0        99.0         4.0         4.0        99.0         1.5         2.5        99.0         3.5         3.0        99.0         2.0         2.0        99.0    3.33    3.33   99.00    1.50    2.17   99.00         4.8         4.6        99.0         1.2         1.7        99.0        4.80        4.45       99.00         3.0         3.0        99.0         4.5         3.5        99.0
          30           2          58           8           5          99       21.40       21.90       20.00          19          19          17         2.0         1.5         1.5         2.5         2.0         2.0         2.5         2.5         2.5         2.0         1.0         1.0         3.0         2.5         2.5         2.0         2.5         2.0    2.67    2.33    2.33    2.00    1.67    1.50         3.9         3.1         3.3         1.9         2.2         2.1        4.00        3.45        3.60         3.5         4.0         4.0         3.0         3.0         3.0
          31           1          26           8           4          99       13.35       16.10       18.10          22          18          20         2.0         1.0         1.0         2.5         3.0         3.0         2.0         2.5         3.5         1.0         1.5         4.0         4.0         3.0         4.0         3.5         1.5         2.5    2.83    2.83    3.50    2.17    1.33    2.50         3.6         2.9         3.0         1.8         1.4         1.5        3.90        3.75        3.75         4.0         2.0         2.5         5.0         4.0         4.5
          32           1          24           7           3           0       15.90       99.00       99.00          32          99          99         1.0        99.0        99.0         2.0        99.0        99.0         1.5        99.0        99.0         1.5        99.0        99.0         2.0        99.0        99.0         3.5        99.0        99.0    1.83   99.00   99.00    2.00   99.00   99.00         2.1        99.0        99.0         3.1        99.0        99.0        2.50       99.00       99.00         3.5         2.5        99.0         2.5         3.5        99.0
          33           1          37           8           3           0       14.10       16.70       12.90          26          23          21         2.0         2.0         1.0         4.0         3.0         3.5         2.0         3.5         3.0         2.0         3.0         2.5         3.0         2.5         3.0         4.0         3.5         1.5    3.00    3.00    3.17    2.67    2.83    1.67         3.2         3.4         3.1         2.9         3.2         2.6        3.15        3.10        3.25         5.0         4.0         4.5         2.5         3.0         2.5
          34           1          23           8           3           0       16.05       14.30       99.00          30          27          99        99.0         2.0        99.0        99.0         3.5        99.0        99.0         2.5        99.0        99.0         1.5        99.0        99.0         3.0        99.0        99.0         3.5        99.0   99.00    3.00   99.00   99.00    2.33   99.00        99.0         3.8        99.0        99.0         3.3        99.0       99.00        3.25       99.00         5.0         4.5        99.0         2.5         2.5        99.0
          35           2          29           8           5          99       13.40       13.20       13.25          22          26          99         2.5         2.0        99.0         2.0         4.0        99.0         2.0         2.5        99.0         1.5         1.0        99.0         2.0         3.5        99.0         3.5         2.5        99.0    2.00    3.33   99.00    2.50    1.83   99.00         2.6         2.9        99.0         3.0         3.1        99.0        2.80        2.90       99.00         4.0         4.0         3.0         4.0         5.0         5.0
          36           1          24           7           4          99       25.45       22.80       23.00           9           7           7         2.5         2.5         1.0         2.0         2.0         2.5         3.0         3.0         3.0         1.0         2.0         1.0         2.0         2.5         2.5         2.5         1.0         1.0    2.33    2.50    2.67    2.00    1.83    1.00         4.5         3.9         4.0         1.3         1.4         1.3        4.60        4.25        4.35         2.0         2.5         2.0         3.5         3.0         4.0
          37           1          24           7           3           0       23.35       99.00       99.00           9          99          99         1.5        99.0        99.0         4.0        99.0        99.0         3.0        99.0        99.0         1.5        99.0        99.0         3.5        99.0        99.0         1.5        99.0        99.0    3.50   99.00   99.00    1.50   99.00   99.00         4.6        99.0        99.0         1.6        99.0        99.0        4.50       99.00       99.00         3.5        99.0        99.0         3.0        99.0        99.0
          38           1          28           8           3           0       14.60        9.95       12.85          31          30          33         1.5         1.5         2.0         3.0         3.0         2.5         1.0         2.0         1.5         1.0         1.0         1.0         2.0         2.5         2.5         3.5         3.0         2.5    2.00    2.50    2.17    2.00    1.83    1.83         2.7         3.7         3.1         4.1         2.9         3.4        2.30        3.40        2.85         5.0         4.5         4.0         4.0         3.5         4.0
          39           1          23           7           3           0        8.65       99.00       99.00          36          99          99         3.0        99.0        99.0         2.5        99.0        99.0         1.0        99.0        99.0         2.0        99.0        99.0         2.5        99.0        99.0         4.0        99.0        99.0    2.00   99.00   99.00    3.00   99.00   99.00         3.3        99.0        99.0         3.7        99.0        99.0        2.80       99.00       99.00         4.0         4.5        99.0         3.5         3.5        99.0
          40           1          22           7           3           0       14.35       99.00       99.00          23          99          99         1.0        99.0        99.0         2.0        99.0        99.0         1.5        99.0        99.0         2.5        99.0        99.0         1.5        99.0        99.0         3.5        99.0        99.0    1.67   99.00   99.00    2.33   99.00   99.00         3.4        99.0        99.0         2.8        99.0        99.0        3.30       99.00       99.00         3.0        99.0        99.0         2.0        99.0        99.0
          41           1          25           8           3           0       16.85       16.50       17.20          99          14          20         1.0         1.0         1.0         1.0         3.5         2.0         3.5         3.0         3.0         1.0         2.0         1.0         1.5         3.5         2.5         2.0         1.0         3.0    2.00    3.33    2.50    1.33    1.33    1.67         3.1         3.3         2.2         2.8         2.3         1.7        3.15        3.50        3.25         4.5         3.5         3.0         4.0         3.0         3.5
          42           2          30           8           3           0       20.65       99.00       99.00          11          99          99         1.0        99.0        99.0         2.0        99.0        99.0         1.5        99.0        99.0         1.0        99.0        99.0         2.0        99.0        99.0         1.0        99.0        99.0    1.83   99.00   99.00    1.00   99.00   99.00         4.0        99.0        99.0         1.7        99.0        99.0        4.15       99.00       99.00         2.5        99.0         2.0         3.0        99.0         3.5
          43           1          26           1           1          99       15.90       16.05       99.00          26          27          99         2.0         2.5        99.0         3.0         3.0        99.0         1.5         1.5        99.0         1.0         1.5        99.0         2.5         2.5        99.0         2.5         3.0        99.0    2.33    2.33   99.00    1.83    2.33   99.00         3.0         2.9        99.0         3.2         3.3        99.0        2.90        2.80       99.00         4.0         4.0        99.0         2.5         3.0        99.0
          44           2          31          10           6          99       19.85       99.00       20.85          13          99          13         1.0        99.0         1.0         3.5        99.0         3.5         2.0        99.0         2.5         1.0        99.0         1.5         3.5        99.0         3.0         2.0        99.0         1.5    3.00   99.00    3.00    1.33   99.00    1.33         4.1        99.0         4.3         1.6        99.0         1.7        4.25       99.00        4.30         2.5        99.0         2.5         4.0        99.0         4.0
          45           1          34           8           3           0       15.95       99.00       14.70          19          99          25         1.5        99.0         1.5         4.0        99.0         4.0         1.5        99.0         2.0         1.0        99.0         1.5         3.5        99.0         2.5         2.5        99.0         3.0    3.00   99.00    2.83    1.67   99.00    2.00         3.1        99.0         3.2         2.4        99.0         3.2        3.35       99.00        3.00         4.0        99.0         4.5         4.5        99.0         4.0
          46           2          23           7           3           0       19.85       99.00       99.00          24          99          99         1.5        99.0        99.0         2.0        99.0        99.0         3.0        99.0        99.0         1.5        99.0        99.0         3.0        99.0        99.0         3.0        99.0        99.0    2.67   99.00   99.00    2.00   99.00   99.00         2.9        99.0        99.0         2.0        99.0        99.0        3.45       99.00       99.00         2.0        99.0        99.0         3.0        99.0        99.0
          47           1          24           8           3           0       16.20       99.00       99.00          21          99          99         3.5        99.0        99.0         2.0        99.0        99.0         2.0        99.0        99.0         3.0        99.0        99.0         2.0        99.0        99.0         3.0        99.0        99.0    2.00   99.00   99.00    3.17   99.00   99.00         3.3        99.0        99.0         2.0        99.0        99.0        3.65       99.00       99.00         4.0        99.0        99.0         3.0        99.0        99.0
          48           1          22           7           3           1       20.60       18.00       99.00          11          22          99         1.0         1.5        99.0         3.5         2.5        99.0         3.5         3.0        99.0         1.5         1.0        99.0         3.5         3.0        99.0         2.0         3.0        99.0    3.50    2.83   99.00    1.50    1.83   99.00         3.3         3.5        99.0         1.5         1.3        99.0        3.90        4.10       99.00         3.0         3.0        99.0         3.5         3.0        99.0
          49           1          30           8           4          99       17.05       18.80       99.00          12          99          99         1.0        99.0        99.0         4.0        99.0        99.0         2.5        99.0        99.0         1.5        99.0        99.0         4.0        99.0        99.0         2.5        99.0        99.0    3.50   99.00   99.00    1.67   99.00   99.00         4.9        99.0        99.0         2.2        99.0        99.0        4.35       99.00       99.00         2.0         2.0        99.0         4.0         4.0        99.0
          50           2          27           8           3           0       12.85       16.35       19.80          33          15          10         2.5         2.5         1.0         2.0         2.5         2.5         3.0         2.5         3.0         3.0         2.0         1.5         2.5         2.5         3.5         4.0         3.0         1.0    2.50    2.50    3.00    3.17    2.50    1.17         1.8         3.2         3.4         3.2         1.8         2.0        2.30        3.70        3.70         3.5         3.5         3.0         2.0         1.5         2.5
          51           1          27           8           3           0       21.75       19.90       20.85          15          22          23         1.0         2.0         1.0         3.0         3.0         3.5         3.5         2.0         2.0         1.5         1.5         1.0         4.0         3.5         3.5         2.0         3.0         2.0    3.50    2.83    3.00    1.50    2.17    1.33         4.6         4.7         4.5         1.8         2.0         2.0        4.40        4.35        4.25         3.5         2.5         3.0         4.0         4.0         4.5
          52           1          30           8           4          99       14.85       17.45       99.00          18          13          99         1.0         1.5        99.0         3.0         2.0        99.0         1.5         2.0        99.0         1.0         1.5        99.0         2.5         2.5        99.0         2.0         2.0        99.0    2.33    2.17   99.00    1.33    1.67   99.00         4.5         4.0        99.0         2.6         2.0        99.0        3.95        4.00       99.00         4.5         3.0        99.0         2.5         3.0        99.0
          53           1          19           7           3           0       11.25       18.70       22.10          25          10          13         4.0         1.0         1.0         2.0         3.0         4.0         1.5         3.5         4.0         2.0         1.5         2.0         1.5         2.0         4.0         3.0         2.0         2.0    1.67    2.83    4.00    3.00    1.50    1.67         2.6         4.0         4.0         3.5         1.6         1.5        2.55        4.20        4.25         5.0         4.5         4.5         3.5         3.5         3.5
          54           1          19           7           3           1       12.95       16.45       21.30          28          19          18         1.5         1.5         1.0         2.5         2.5         3.5         2.0         2.5         3.5         2.0         2.0         1.0         2.0         3.0         3.0         3.0         2.0         1.0    2.17    2.67    3.33    2.17    1.83    1.00         3.0         3.2         4.3         3.1         2.1         1.7        2.95        3.55        4.30         4.5         4.0         3.5         4.0         3.5         2.5
          55           1          43           8           4          99       22.65       23.45       99.00          18          12          99         1.0         1.0        99.0         2.5         3.0        99.0         3.5         3.5        99.0         2.5         1.5        99.0         3.0         3.5        99.0         1.0         1.0        99.0    3.00    3.33   99.00    1.50    1.17   99.00         2.7         3.8        99.0         1.9         1.2        99.0        3.40        4.30       99.00         2.5         2.5        99.0         3.0         3.5        99.0
          56           2          25           7           3           0       24.35       23.20       99.00          22          24          99         1.0         1.5        99.0         2.5         2.5        99.0         3.0         2.0        99.0         1.0         2.0        99.0         3.0         2.5        99.0         2.0         2.5        99.0    2.83    2.33   99.00    1.33    2.00   99.00         3.4         2.6        99.0         1.6         2.6        99.0        3.90        3.00       99.00         2.5         2.5        99.0         2.0         2.5        99.0
          57           1          23           7           3           0       17.30       99.00       99.00          15          99          99         2.0        99.0        99.0         3.5        99.0        99.0         4.0        99.0        99.0         2.0        99.0        99.0         2.5        99.0        99.0         1.0        99.0        99.0    3.33   99.00   99.00    1.67   99.00   99.00         3.6        99.0        99.0         2.2        99.0        99.0        3.70       99.00       99.00         3.5        99.0        99.0         1.5        99.0        99.0
          58           1          25           8           3           0       11.25       14.90       16.30          27          19          22         2.0         1.0         1.5         1.5         2.0         2.0         2.0         2.0         2.0         1.5         1.0         1.0         2.0         2.0         2.0         2.5         2.0         2.0    1.83    2.00    2.00    2.00    1.33    1.50         1.6         1.9         2.5         4.3         1.7         2.3        1.65        3.10        3.10         4.5         3.5         4.5         3.0         2.5         2.5
          59           1          25           8           3           0       21.30       21.95       24.40          21          17          13         1.0         1.0         1.0         2.0         2.0         3.0         3.5         3.5         1.0         1.0         2.0         1.0         3.5         3.0         3.0         1.0         1.0         2.5    3.00    2.83    2.33    1.00    1.33    1.50         3.9         4.2         4.1         2.0         2.4         1.9        3.95        3.90        4.10         3.5         4.0         3.0         3.5         4.5         4.5
          60           1          26           7           3           0       20.45       20.70       22.70          14          12          10         1.0         1.0         2.0         3.0         3.5         3.0         2.5         2.5         2.5         1.5         1.0         1.5         2.5         3.5         3.0         3.5         2.5         2.0    2.67    3.17    2.83    2.00    1.50    1.83         4.0         4.3         4.3         1.9         2.6         2.4        4.05        3.85        3.95         2.0         2.5         2.0         2.0         3.0         3.0
          61           2          28           8           3           0       23.00       20.90       21.70          14          17          15         1.0         1.0         1.0         3.0         3.0         2.5         1.0         1.5         1.0         1.0         2.0         1.0         3.0         3.0         3.5         2.0         1.5         1.5    2.33    2.50    2.33    1.33    1.50    1.17         3.9         3.8         4.2         1.9         2.1         1.4        4.00        3.85        4.40         3.5         3.5         2.5         3.5         4.0         3.0
          62           2          26          10           4          99       20.65       20.00       21.40          25          19          99         3.0         2.0        99.0         2.5         4.0        99.0         3.0         3.5        99.0         2.5         1.5        99.0         2.5         3.0        99.0         3.0         1.5        99.0    2.67    3.50   99.00    2.83    1.67   99.00         3.1         3.7        99.0         2.2         1.4        99.0        3.45        4.15       99.00         3.0         1.0         2.5         3.5         3.0         4.0
          63           2          19           7           7          99       22.10       99.00       99.00           9          99          99         1.0        99.0        99.0         3.5        99.0        99.0         4.0        99.0        99.0         1.0        99.0        99.0         3.5        99.0        99.0         2.0        99.0        99.0    3.67   99.00   99.00    1.33   99.00   99.00         3.7        99.0        99.0         1.6        99.0        99.0        4.05       99.00       99.00         2.5        99.0        99.0         3.5        99.0        99.0
          64           1          50           7           4          99       20.05       19.65       19.15           6           8          15         2.5         1.0         1.0         3.0         3.0         1.0         3.5         4.0         2.0         2.5         4.0         1.0         4.0         4.0         2.0         1.0         1.0         1.0    3.50    3.67    1.67    2.00    2.00    1.00         4.6         4.7         4.2         1.9         1.6         2.0        4.35        4.55        4.10         1.0         1.0         1.0         5.0         4.5         4.5
          65           2          28          10           4          99       22.00       18.65       99.00           9           4          99         1.0         1.0        99.0         3.0         3.0        99.0         2.5         1.0        99.0         1.0         1.0        99.0         3.0         3.0        99.0         1.0         2.0        99.0    2.83    2.33   99.00    1.00    1.33   99.00         2.9         3.8        99.0         2.0         1.2        99.0        3.45        4.30       99.00         1.0         1.5         2.0         3.5         3.5         3.5
          66           2          27           6           3           0       16.95       99.00       99.00          26          99          99         1.5        99.0        99.0         2.0        99.0        99.0         3.0        99.0        99.0         2.0        99.0        99.0         1.0        99.0        99.0         3.5        99.0        99.0    2.00   99.00   99.00    2.33   99.00   99.00         2.2        99.0        99.0         2.9        99.0        99.0        2.65       99.00       99.00         4.0        99.0        99.0         2.5        99.0        99.0
          67           1          25          10           4          99       16.90       99.00       99.00          29          99          99         1.5        99.0        99.0         3.0        99.0        99.0         2.0        99.0        99.0         1.0        99.0        99.0         2.5        99.0        99.0         2.0        99.0        99.0    2.50   99.00   99.00    1.50   99.00   99.00         1.9        99.0        99.0         2.1        99.0        99.0        2.90       99.00       99.00         4.0        99.0        99.0         2.0        99.0        99.0
          68           2          23           7           3           0       18.40       99.00       99.00          17          99          99         1.0        99.0        99.0         2.0        99.0        99.0         2.0        99.0        99.0         1.0        99.0        99.0         1.5        99.0        99.0         2.5        99.0        99.0    1.83   99.00   99.00    1.50   99.00   99.00         3.2        99.0        99.0         1.8        99.0        99.0        3.70       99.00       99.00         2.0        99.0        99.0         1.5        99.0        99.0
          69           1          27           7           3           0       10.70       11.05       11.25          26          24          18         1.0         1.0         1.0         3.5         3.5         4.0         3.5         4.0         3.5         1.0         1.0         1.0         3.0         2.5         2.5         2.5         3.0         3.0    3.33    3.33    3.33    1.50    1.67    1.67         3.6         4.0         3.7         2.3         1.7         1.8        3.65        4.15        3.95         4.5         4.5         3.0         4.5         4.5         4.5
          70           2          27           7           4          99       17.95       17.60       18.50          17          22          15         2.0         1.0         1.0         3.0         2.0         3.0         2.0         2.5         2.5         1.0         2.0         1.5         2.5         3.0         2.0         4.0         3.5         2.5    2.50    2.50    2.50    2.33    2.17    1.67         2.3         2.5         3.0         3.1         3.2         2.0        2.60        2.65        3.50         3.5         3.5         3.5         4.0         3.0         3.5
          71           1          31           8           4          99       16.05       15.40       17.80          19          18          99         1.0         1.5        99.0         3.5         4.0        99.0         2.0         3.0        99.0         1.0         1.0        99.0         2.0         2.5        99.0         2.0         1.5        99.0    2.50    3.17   99.00    1.33    1.33   99.00         3.7         3.8        99.0         2.2         1.6        99.0        3.75        4.10       99.00         4.0         4.5         4.0         3.5         3.0         3.5
          72           1          26          10           3           0       12.95       14.90       15.85          30          22          18         3.0         1.0         1.5         3.0         3.0         3.5         1.5         2.0         3.5         2.0         1.0         1.0         3.5         2.0         1.5         3.5         2.0         2.5    2.67    2.33    2.83    2.83    1.33    1.67         2.8         4.2        99.0         2.7         2.3        99.0        3.05        3.95       99.00         3.5         3.0         4.5         4.0         3.0         3.5
          73           2          24           8           3           0        7.10       10.45        9.45          31          30          35         2.5         2.5        99.0         2.5         2.0        99.0         2.0         1.5        99.0         1.5         1.0        99.0         2.0         1.0        99.0         3.5         3.5        99.0    2.17    1.50   99.00    2.50    2.33   99.00         2.6         2.0        99.0         3.7         3.0        99.0        2.45        2.50       99.00         5.0         4.5         4.5         3.5         3.0         2.5
          74           1          24           7           3           0       12.40       99.00       99.00          24          99          99         2.0        99.0        99.0         3.0        99.0        99.0         3.0        99.0        99.0         1.0        99.0        99.0         2.5        99.0        99.0         3.0        99.0        99.0    2.83   99.00   99.00    2.00   99.00   99.00         3.2        99.0        99.0         2.5        99.0        99.0        3.35       99.00       99.00         4.0        99.0        99.0         3.0        99.0        99.0
          75           2          37           8           5          99       13.85       15.05       15.15          15          12          12         1.0         1.0         1.0         3.0         3.0         3.0         2.0         2.5         2.0         1.5         1.5         2.0         2.5         2.0         2.0         3.0         2.0         3.0    2.50    2.50    2.33    1.83    1.50    2.00         3.4         3.4         3.7         2.4         2.0         1.7        3.50        3.70        4.00         3.0         3.5         3.0         3.0         3.0         3.0
          76           1          24           7           3           0       17.15       18.50       20.75          21          21          18         1.0         1.0         1.5         2.0         2.0         2.5         2.5         4.0         3.0         1.0         2.0         1.0         2.0         2.0         2.5         2.0         2.0         3.5    2.17    2.67    2.67    1.33    1.67    2.00         3.0         3.5         3.6         2.2         2.1         1.8        3.40        3.70        3.90         3.0         3.5         3.0         3.0         2.5         3.5
          77           3          32           6           3           1       18.80       19.00       17.55          17          18          24         1.0         1.0         2.5         4.0         4.0         3.0         3.0         2.5         1.0         1.0         1.0         1.0         2.0         1.5         2.5         2.5         2.0         2.0    3.00    2.67    2.17    1.50    1.33    1.83         2.9         2.7         1.9         2.4         2.5         2.9        3.25        3.10        2.50         3.5         3.0         4.0         3.0         3.0         3.5
          78           1          29           7           4          99       16.95       18.85       99.00          20          23          99         1.0         2.0        99.0         2.5         2.5        99.0         4.0         2.0        99.0         1.5         1.0        99.0         2.0         2.0        99.0         2.5         3.0        99.0    2.83    2.17   99.00    1.67    2.00   99.00         2.8         2.3        99.0         2.1         1.7        99.0        3.35        3.30       99.00         2.5         3.5        99.0         3.5         3.5        99.0
          79           1          65           9           4          99       15.35       99.00       99.00          25          99          99         2.5        99.0        99.0         2.0        99.0        99.0         2.0        99.0        99.0         2.5        99.0        99.0         2.5        99.0        99.0         4.0        99.0        99.0    2.17   99.00   99.00    3.00   99.00   99.00         2.5        99.0        99.0         2.5        99.0        99.0        3.00       99.00       99.00         4.5        99.0        99.0         4.0        99.0        99.0
          80           1          52           8           5          99       19.50       19.45       19.00          15          14          12         1.0         1.0         1.0         1.5         2.5         1.0         2.0         2.0         1.0         1.5         1.0         1.0         2.5         3.0         3.0         2.0         2.0         1.5    2.00    2.50    1.67    1.50    1.33    1.17         3.4         3.4         3.0         1.9         2.4         2.0        3.75        3.50        3.50         3.0         4.0         3.5         3.0         3.0         2.5
          81           2          26           8           3           0       14.80       99.00       99.00          26          99          99         1.5        99.0        99.0         3.0        99.0        99.0         3.5        99.0        99.0         2.5        99.0        99.0         2.5        99.0        99.0         2.0        99.0        99.0    3.00   99.00   99.00    2.00   99.00   99.00         3.7        99.0        99.0         3.3        99.0        99.0        3.20       99.00       99.00         2.0        99.0        99.0         4.0        99.0        99.0
          82           1          20           7           3           1       21.35       19.75       19.20          16          20          19         1.5         3.0         1.0         2.5         3.0         2.5         2.5         1.5         3.5         2.5         1.0         1.5         2.0         1.5         2.5         2.5         2.5         2.0    2.33    2.00    2.83    2.17    2.17    1.50         3.1         2.4         3.4         1.9         2.2         2.5        3.60        3.10        3.45         3.5         4.0         4.5         3.0         1.5         2.0
          83           1          28           8           5          99       15.40       99.00       99.00          18          99          99         1.0        99.0        99.0         3.0        99.0        99.0         2.0        99.0        99.0         1.0        99.0        99.0         1.5        99.0        99.0         1.0        99.0        99.0    2.17   99.00   99.00    1.00   99.00   99.00         3.0        99.0        99.0         1.8        99.0        99.0        3.60       99.00       99.00         3.5        99.0        99.0         3.0        99.0        99.0
          84           2          27          10           3           1       18.65       19.00       18.75          12          11          14         1.5         1.0         1.0         3.0         3.0         3.0         3.5         3.5         3.0         1.0         1.0         1.5         3.5         2.0         3.5         2.5         1.5         3.0    3.33    2.83    3.17    1.67    1.17    1.83         3.7         4.2         3.8         2.4         2.7         2.7        3.65        3.75        3.55         2.0         2.0         2.0         4.0         4.5         3.0
          85           1          27           6           3           0       14.20       11.45       99.00          26          33          99         1.0         2.5        99.0         2.0         2.5        99.0         2.5         2.0        99.0         2.0         2.0        99.0         1.0         1.0        99.0         3.0         2.5        99.0    1.83    1.83   99.00    2.00    2.33   99.00         2.5         3.1        99.0         3.3         3.5        99.0        2.60        2.80       99.00         4.0         3.5        99.0         3.0         2.5        99.0
          86           1          37           8           5          99       21.35       99.00       99.00          15          99          99         2.0        99.0        99.0         2.0        99.0        99.0         2.0        99.0        99.0         1.5        99.0        99.0         3.5        99.0        99.0         2.5        99.0        99.0    2.50   99.00   99.00    2.00   99.00   99.00         3.4        99.0        99.0         1.9        99.0        99.0        3.75       99.00       99.00         4.0        99.0        99.0         2.5        99.0        99.0
          87           1          24           7           3           0       17.40       14.70       99.00          99          20          99        99.0         1.0        99.0        99.0         3.0        99.0        99.0         4.0        99.0        99.0         1.5        99.0        99.0         4.0        99.0        99.0         4.0        99.0   99.00    3.67   99.00   99.00    2.17   99.00        99.0         4.0        99.0        99.0         2.1        99.0       99.00        3.95       99.00         2.5         2.0        99.0         2.5         3.0        99.0
          88           1          19           7           3           0       16.65       13.95       99.00          19          26          99         1.0         2.0        99.0         4.0         2.5        99.0         3.0         2.5        99.0         1.5         1.5        99.0         4.0         2.5        99.0         4.0         1.5        99.0    3.67    2.50   99.00    2.17    1.67   99.00         3.3         2.9        99.0         2.8         2.9        99.0        3.25        3.00       99.00         4.5         4.5        99.0         2.0         4.0        99.0
          89           2          29          10           4          99       23.05       21.55       23.75          13          10           9         1.5         1.5         1.0         2.5         2.5         1.5         3.0         3.0         3.0         1.0         1.5         2.5         3.0         3.5         2.5         1.0         1.0         1.5    2.83    3.00    2.33    1.17    1.33    1.67         3.7         3.6         3.7         1.2         1.5         1.5        4.25        4.05        4.10         2.0         2.5         2.5         4.0         4.0         4.0
          90           1          27           8           6          99       21.60       23.50       99.00          23          11          99         1.0        99.0        99.0         3.0        99.0        99.0         3.0        99.0        99.0         1.0        99.0        99.0         3.0        99.0        99.0         1.0        99.0        99.0    3.00   99.00   99.00    1.00   99.00   99.00         3.2        99.0        99.0         1.3        99.0        99.0        3.95       99.00       99.00         3.5         2.0        99.0         3.0         3.0        99.0
          91           1          22           8           3           0       22.30       23.05       19.30          20           6          24         2.5         1.0         1.0         3.0         3.5         2.5         4.0         4.0         3.0         1.5         1.0         1.0         3.5         4.0         3.0         1.0         1.5         2.5    3.50    3.83    2.83    1.67    1.17    1.50         3.7         3.8         3.6         2.0         2.0         1.8        3.85        3.90        3.90         3.0         3.0         3.5         4.0         3.0         4.0
          92           2          24          10           7          99       16.35       99.00       99.00          12          99          99         2.0        99.0        99.0         2.0        99.0        99.0         3.0        99.0        99.0         2.0        99.0        99.0         3.0        99.0        99.0         2.5        99.0        99.0    2.67   99.00   99.00    2.17   99.00   99.00         3.4        99.0        99.0         2.3        99.0        99.0        3.55       99.00       99.00         4.5        99.0        99.0         2.5        99.0        99.0
          93           2          50           8           4          99       17.80       99.00       99.00          23          99          99         2.5        99.0        99.0         2.5        99.0        99.0         2.0        99.0        99.0         2.0        99.0        99.0         2.0        99.0        99.0         2.5        99.0        99.0    2.17   99.00   99.00    2.33   99.00   99.00         3.5        99.0        99.0         3.0        99.0        99.0        3.25       99.00       99.00         3.5        99.0        99.0         4.0        99.0        99.0
          94           1          25          10           4          99       15.05       99.00       99.00          30          99          99         1.0        99.0        99.0         2.0        99.0        99.0         1.5        99.0        99.0         1.0        99.0        99.0         1.5        99.0        99.0         2.5        99.0        99.0    1.67   99.00   99.00    1.50   99.00   99.00         3.3        99.0        99.0         2.3        99.0        99.0        3.50       99.00       99.00         3.5        99.0        99.0         4.0        99.0        99.0
          95           2          19           7           7          99       19.90       99.00       99.00          19          99          99         1.0        99.0        99.0         3.5        99.0        99.0         2.0        99.0        99.0         1.0        99.0        99.0         3.0        99.0        99.0         2.0        99.0        99.0    2.83   99.00   99.00    1.33   99.00   99.00         3.7        99.0        99.0         1.8        99.0        99.0        3.95       99.00       99.00         1.5        99.0        99.0         4.0        99.0        99.0
          96           1          55           8           5          99       23.55       25.20       25.80           4           8           5         1.0         1.0         1.0         3.5         3.0         3.5         3.5         2.0         3.0         1.0         1.0         1.0         3.5         2.5         3.5         1.0         1.0         1.0    3.50    2.50    3.33    1.00    1.00    1.00         4.7         4.4         4.2         1.1         1.1         1.0        4.80        4.65        4.60         2.0         2.0         1.5         5.0         5.0         5.0
          97           1          48           8           7          99       22.95       99.00       99.00          12          99          99         1.5        99.0        99.0         3.5        99.0        99.0         1.5        99.0        99.0         1.0        99.0        99.0         3.0        99.0        99.0         2.0        99.0        99.0    2.67   99.00   99.00    1.50   99.00   99.00         3.6        99.0        99.0         1.6        99.0        99.0        4.00       99.00       99.00         3.0        99.0         2.5         5.0        99.0         4.5
          98           1          62          10           5          99       22.10       21.25       22.55          13          13          14         1.0         1.5         1.5         4.0         2.5         3.0         3.5         2.5         3.0         1.0         2.0         1.0         3.5         3.0         3.5         2.5         2.0         1.5    3.67    2.67    3.17    1.50    1.83    1.33         3.8         3.6         4.2         1.7         1.7         1.5        4.05        3.95        4.35         2.5         2.0         3.0         4.0         4.0         4.0
          99           2          69           7           9           0       17.35       99.00       99.00          12          99          99         1.5        99.0        99.0         2.5        99.0        99.0         2.5        99.0        99.0         2.0        99.0        99.0         2.5        99.0        99.0         2.0        99.0        99.0    2.50   99.00   99.00    1.83   99.00   99.00         3.9        99.0        99.0         1.6        99.0        99.0        4.15       99.00       99.00         2.5        99.0        99.0         5.0        99.0        99.0
         100           2          50           6           4          99       18.90       99.00       99.00          14          99          99         2.0        99.0        99.0         3.0        99.0        99.0         2.0        99.0        99.0         1.5        99.0        99.0         3.0        99.0        99.0         2.0        99.0        99.0    2.67   99.00   99.00    1.83   99.00   99.00         3.6        99.0        99.0         1.8        99.0        99.0        3.90       99.00       99.00         2.0        99.0        99.0         4.0        99.0        99.0
         101           1          23           4           7          99       23.85       22.25       21.00          23          21          20         2.0         1.5         1.5         2.5         2.5         2.5         3.0         3.0         2.5         2.0         1.5         1.5         2.0         2.0         1.5         2.0         2.0         1.5    2.50    2.50    2.17    2.00    1.67    1.50         1.9         2.8         1.9         2.2         2.1         2.2        2.85        3.35        2.85         4.0         4.0         4.0         3.5         3.0         3.5
         102           1          56          10           4          99       27.90       21.70       23.35          27          30          33         2.5         3.5         2.0         2.0         1.0         2.0         3.5         3.0         4.0         3.0         2.0         2.0         4.0         2.5         2.5         1.0         2.0         1.5    3.17    2.17    2.83    2.17    2.50    1.83         2.5         1.9         2.9         2.5         2.0         2.7        3.00        2.95        3.10         3.5         2.0         2.0         3.0         2.5         3.0
         103           2          38           8           8           0       18.10       20.55       19.55          16          14          14         1.0         1.0         1.0         2.5         3.0         2.0         3.0         3.0         3.0         2.0         1.0         1.5         2.0         2.5         2.5         1.5         1.0         1.5    2.50    2.83    2.50    1.50    1.00    1.33         3.4         3.3         3.1         2.0         1.6         1.9        3.70        3.85        3.60         3.0         2.0         3.0         3.5         3.5         3.0
         104           1          30           8           4          99       26.80       25.15       25.00          11           9           6         1.0         1.5         1.5         3.0         4.0         4.0         2.0         3.5         3.5         1.0         1.5         1.5         4.0         3.5         4.0         1.0         1.0         1.0    3.00    3.67    3.83    1.00    1.33    1.33         4.0         4.5         4.9         1.6         1.5         1.4        4.20        4.50        4.75         2.0         2.0         2.0         4.5         4.5         4.0
         105           1          47           4           4          99       20.60       99.00       99.00          20          99          99         1.0        99.0        99.0         3.0        99.0        99.0         3.0        99.0        99.0         2.0        99.0        99.0         3.5        99.0        99.0         1.0        99.0        99.0    3.17   99.00   99.00    1.33   99.00   99.00         4.0        99.0        99.0         1.7        99.0        99.0        4.15       99.00       99.00         2.0        99.0        99.0         4.5        99.0        99.0
         106           1          55          10           4          99       17.80       99.00       99.00          15          99          99         2.0        99.0        99.0         2.5        99.0        99.0         2.5        99.0        99.0         2.0        99.0        99.0         2.0        99.0        99.0         2.5        99.0        99.0    2.33   99.00   99.00    2.17   99.00   99.00         3.6        99.0        99.0         1.9        99.0        99.0        3.85       99.00       99.00         3.0        99.0        99.0         4.0        99.0        99.0
         107           2          62           4           9           0       20.25       20.65       20.45          10          15          18         1.0         1.0         1.0         2.0         2.5         2.5         2.0         2.5         1.5         1.0         1.0         1.0         2.0         2.5         2.5         1.5         2.0         1.0    2.00    2.50    2.17    1.17    1.33    1.00         4.5         4.2         4.5         1.6         2.2         1.5        4.45        4.00        4.50         3.5         2.5         2.5         5.0         5.0         5.0
         108           1          28           7           3           0       10.70       99.00       99.00          32          99          99         1.0        99.0        99.0         2.5        99.0        99.0         1.5        99.0        99.0         1.0        99.0        99.0         2.0        99.0        99.0         3.0        99.0        99.0    2.00   99.00   99.00    1.67   99.00   99.00         2.0        99.0        99.0         3.9        99.0        99.0        2.05       99.00       99.00         5.0        99.0        99.0         2.0        99.0        99.0
         109           2          20           7           3           0       17.10       13.45       99.00          31          35          99         2.0         1.0        99.0         3.0         2.0        99.0         3.0         2.5        99.0         1.5         1.5        99.0         2.5         2.0        99.0         3.0         3.5        99.0    2.83    2.17   99.00    2.17    2.00   99.00         3.8         3.1        99.0         4.0         3.2        99.0        2.90        2.95       99.00         3.5         3.0        99.0         4.0         3.5        99.0
         110           2          27           8           3           0       23.50       99.00       99.00           9          99          99         1.0        99.0        99.0         3.5        99.0        99.0         2.5        99.0        99.0         1.5        99.0        99.0         2.5        99.0        99.0         2.0        99.0        99.0    2.83   99.00   99.00    1.50   99.00   99.00         4.1        99.0        99.0         1.9        99.0        99.0        4.10       99.00       99.00         2.5        99.0        99.0         4.0        99.0        99.0
         111           1          22           7           3           0       17.85       18.85       19.90          13          12          13         2.5         2.5         2.5         3.5         3.0         3.0         2.0         2.0         2.0         1.5         1.0         1.0         2.0         2.5         2.0         4.0         3.0         3.0    2.50    2.50    2.33    2.67    2.17    2.17         3.5         3.5         3.4         1.8         1.6         1.6        3.85        3.95        3.90         2.5         3.0         2.0         3.0         3.0         2.5
         112           2          21           7           3           0       17.20       18.15       99.00          23          25          99         2.0         2.0        99.0         2.0         2.0        99.0         3.0         2.5        99.0         2.0         2.0        99.0         3.5         2.5        99.0         2.0         2.0        99.0    2.83    2.33   99.00    2.00    2.00   99.00         2.8         3.4        99.0         1.9         2.7        99.0        3.45        3.35       99.00         3.0         2.5        99.0         3.0         2.5        99.0
         113           1          25           8           3           0       13.25       12.30       13.95          24          23          27         1.0         1.0         1.0         3.0         3.0         3.0         2.5         1.5         2.0         2.0         2.0         1.0         2.5         1.5         2.0         3.5         3.5         4.0    2.67    2.00    2.33    2.17    2.17    2.00         2.7         3.2         3.5         2.1         2.5         2.4        3.30        3.35        3.55         4.5         5.0         4.5         5.0         5.0         4.5
         114           1          30           8           4          99       13.70       10.30       11.60          21          18          18         1.0         1.0         1.0         2.0         2.0         2.0         2.0         2.5         2.0         1.0         1.5         1.0         1.5         2.0         1.5         2.5         2.0         2.0    1.83    2.17    1.83    1.50    1.50    1.33         3.8         4.5         4.6         1.8         3.9         4.0        4.00        3.30        3.30         3.0         4.0         4.0         5.0         5.0         5.0
         115           1          19           7           3           0       15.75       99.00       16.40          26          99          22         1.5        99.0         1.5         2.0        99.0         2.5         3.0        99.0         3.5         2.0        99.0         1.5         2.0        99.0         2.0         3.5        99.0         3.0    2.33   99.00    2.67    2.33   99.00    2.00         2.8        99.0         2.9         3.0        99.0         2.9        2.90       99.00        3.00         4.5        99.0         4.0         3.5        99.0         3.5
         116           1          24           7           3           0       21.95       99.00       99.00          18          99          99         1.0        99.0        99.0         3.0        99.0        99.0         3.0        99.0        99.0         1.0        99.0        99.0         2.5        99.0        99.0         2.0        99.0        99.0    2.83   99.00   99.00    1.33   99.00   99.00         3.5        99.0        99.0         2.0        99.0        99.0        3.75       99.00       99.00         2.0        99.0        99.0         4.0        99.0        99.0
         117           2          59           8           4          99       21.30       99.00       99.00          14          99          99         2.0        99.0        99.0         3.0        99.0        99.0         1.5        99.0        99.0         1.0        99.0        99.0         2.5        99.0        99.0         2.0        99.0        99.0    2.33   99.00   99.00    1.67   99.00   99.00         3.9        99.0        99.0         2.3        99.0        99.0        3.80       99.00       99.00         2.5        99.0        99.0         4.0        99.0        99.0
         118           1          21           7           3           1       19.25       23.10       99.00          15           5          99         1.0         1.0        99.0         4.0         4.0        99.0         2.0         3.0        99.0         1.0         1.0        99.0         2.5         4.0        99.0         1.5         1.5        99.0    2.83    3.67   99.00    1.17    1.17   99.00         4.4         4.8        99.0         1.3         1.2        99.0        4.55        4.80       99.00         4.0         2.5        99.0         4.5         4.0        99.0
         119           2          29           8           5          99       26.05       27.60       27.40          10           7           7         1.0         1.0         1.0         3.5         4.0         4.0         4.0         3.0         3.5         1.5         1.0         1.0         4.0         4.0         4.0         1.5         2.0         1.0    3.83    3.67    3.83    1.33    1.33    1.00         3.7         4.1         3.9         1.3         1.2         1.1        4.20        4.45        4.40         1.0         1.0         1.5         2.0         2.5         2.0
         120           1          21           7           3           0       15.00       17.55       18.30          22          23           8         1.5         1.5         1.5         3.0         3.0         4.0         3.5         3.0         3.0         1.0         1.0         1.0         2.0         3.5         3.0         3.0         1.5         2.0    2.83    3.17    3.33    1.83    1.33    1.50         3.5         3.5         3.6         1.5         1.9         1.9        4.00        3.80        3.85         3.5         4.0         2.5         4.0         4.0         4.0
         121           1          42           8           5          99       21.05       24.30       23.60          29          11           8         1.0         1.0         1.0         3.0         3.0         3.0         3.5         3.0         4.0         2.0         2.0         1.0         3.0         3.0         3.0         1.5         2.0         1.0    3.17    3.00    3.33    1.50    1.67    1.00         2.3         2.4         3.7         2.6         2.3         1.2        2.85        3.05        4.25         2.5         2.0         2.0         3.0         3.0         3.5
         122           1          22           8           3           0       12.15       13.55       10.45          20          23          19         1.0         1.5         1.0         2.0         2.0         2.0         3.5         2.5         2.5         1.5         1.5         2.0         2.5         2.0         1.5         3.5         3.0         2.5    2.67    2.17    2.00    2.00    2.00    1.83         3.4         3.3         3.0         1.9         2.2         2.3        3.75        3.55        3.35         3.5         4.0         4.0         3.0         3.0         3.0
         123           2          24           7           3           1       22.40       23.00       99.00          16          12          99         1.0         1.0        99.0         2.0         3.0        99.0         2.5         3.0        99.0         1.0         1.0        99.0         3.5         2.5        99.0         2.5         2.5        99.0    2.67    2.83   99.00    1.50    1.50   99.00         3.2         3.5        99.0         1.6         1.5        99.0        3.80        4.00       99.00         2.5         3.0        99.0         3.0         3.0        99.0
         124           1          24           8           3           0       16.05       99.00       99.00          16          99          99         1.0        99.0        99.0         4.0        99.0        99.0         4.0        99.0        99.0         1.0        99.0        99.0         2.0        99.0        99.0         2.0        99.0        99.0    3.33   99.00   99.00    1.33   99.00   99.00         3.7        99.0        99.0         2.1        99.0        99.0        3.80       99.00       99.00         3.0         3.0        99.0         4.0         3.5        99.0
         125           1          29           7           3           0       20.30       24.50       22.35          14           9          16         1.5         1.0         1.5         4.0         4.0         4.0         2.5         2.0         3.0         1.5         1.0         1.0         4.0         4.0         4.0         1.5         2.0         2.0    3.50    3.33    3.67    1.50    1.33    1.50         3.5         4.1         4.2         2.0         1.8         2.0        3.75        4.15        4.10         2.0         2.0         2.0         5.0         5.0         5.0
         126           1          21           7           3           1       17.20       18.35       99.00          23          22          99         1.0         1.5        99.0         2.5         2.5        99.0         3.0         3.0        99.0         2.0         1.5        99.0         4.0         3.5        99.0         2.0         2.0        99.0    3.17    3.00   99.00    1.67    1.67   99.00         3.1         3.3        99.0         1.8         2.2        99.0        3.65        3.55       99.00         4.5         4.5        99.0         2.5         2.5        99.0
         127           1          26           7           3           1       21.60       21.15       22.55          15          15          15         1.5         1.0         1.5         3.0         3.0         3.5         2.5         2.5         2.5         1.0         1.0         1.0         3.5         2.5         2.5         1.5         1.5         1.0    3.00    2.67    2.83    1.33    1.17    1.17         4.0         4.2         4.0         1.9         1.9         1.7        4.05        4.15        4.15         4.0         4.0         3.5         4.5         3.5         4.5
         128           1          56           4           9          99       26.55       21.75       23.10          16          16          13         1.0         1.0         1.0         4.0         3.0         3.0         4.0         2.5         2.5         1.5         1.5         2.0         4.0         4.0         3.0         2.0         2.5         2.0    4.00    3.17    2.83    1.50    1.67    1.67         3.7         3.3         3.0         1.4         1.9         1.3        4.15        3.70        3.85         3.0         4.0         3.0         4.5         4.0         4.0
         129           1          21           7           3           1       18.80       15.50       17.10          27          30          26         2.0         1.5         2.5         2.0         1.5         2.0         3.0         3.0         4.0         3.0         3.0         3.0         2.0         1.5         2.0         2.0         3.0         3.0    2.33    2.00    2.67    2.33    2.50    2.83         3.2         2.9         2.9         2.7         3.0         3.0        3.25        2.95        2.95         4.0         3.5         3.5         2.5         2.5         3.0
         130           1          29           7           3           1       17.50       21.25       20.35          11          13           9         1.5         1.5         1.5         2.5         3.0         3.5         2.5         2.5         3.0         1.5         1.0         1.5         3.0         2.5         2.5         3.0         2.0         2.0    2.67    2.67    3.00    2.00    1.50    1.67         3.3         3.4         3.8         1.8         2.2         2.2        3.75        3.60        3.80         4.0         3.5         3.0         3.5         4.0         4.0
         131           1          24           7           3           1       18.75       20.75       20.90          13          10           9         1.5         2.0         1.0         3.0         2.0         3.0         2.5         2.5         2.0         1.0         1.0         1.0         3.0         3.5         3.5         2.5         3.0         1.5    2.83    2.67    2.83    1.67    2.00    1.17         3.7         2.9         3.2         2.0         2.8         2.3        3.85        3.05        3.45         3.0         3.0         3.5         3.0         3.0         3.0
         132           1          19           7           3           1       19.20       18.00       17.80          18          18          23         1.5         1.0         1.0         3.0         3.0         2.0         2.0         3.0         1.5         1.0         1.0         2.0         4.0         3.0         1.5         2.0         2.0         2.0    3.00    3.00    1.67    1.50    1.33    1.67         2.9         3.4         2.3         1.1         1.6         1.9        3.90        3.90        3.20         3.5         4.0         4.0         2.5         3.0         3.0
         133           1          51          10           4          99       16.65       15.95       17.30          10          15           8         1.0         3.0         2.5         3.0         2.5         2.5         2.0         2.5         2.5         1.0         2.0         1.0         3.0         1.0         2.0         2.0         2.0         1.5    2.67    2.00    2.33    1.33    2.33    1.67         2.7         3.0         3.4         2.1         1.8         1.4        3.30        3.60        4.00         2.0         2.5         2.0         4.0         3.5         4.0
         134           1          25           8           4          99       20.85       22.20       23.35          10          12          10         1.0         1.5         1.5         4.0         3.5         3.0         2.5         2.0         2.0         1.5         1.0         1.0         3.0         3.5         4.0         1.5         2.5         1.5    3.17    3.00    3.00    1.33    1.67    1.33         4.3         4.0         4.3         1.3         1.2         1.3        4.50        4.40        4.50         2.0         2.5         2.0         4.5         5.0         5.0
         135           2          23           7           3          99       15.95       14.95       99.00          17          19          99         1.0         1.5        99.0         3.0         2.5        99.0         1.5         2.0        99.0         2.0         1.5        99.0         2.5         1.5        99.0         2.0         1.5        99.0    2.33    2.00   99.00    1.67    1.50   99.00         3.0         2.2        99.0         2.9         2.9        99.0        3.05        2.65       99.00         3.0         3.0        99.0         4.0         4.0        99.0
         136           1          30           8           4          99       20.35       19.65       99.00          14          15          99         1.0         2.0        99.0         3.0         3.0        99.0         2.0         2.5        99.0         1.0         2.0        99.0         2.0         3.0        99.0         1.0         2.5        99.0    2.33    2.83   99.00    1.00    2.17   99.00         3.8         3.3        99.0         2.0         1.3        99.0        3.90        4.00       99.00         2.0         2.0         2.0         3.5         3.5         3.5
         137           2          20           7           3           0       14.95       14.15       14.35          19          19          20         3.0         2.0         1.0         2.0         2.0         2.0         2.5         2.0         2.5         1.5         1.5         2.0         2.5         2.0         2.5         2.5         4.0         3.0    2.33    2.00    2.33    2.33    2.50    2.00         3.1         2.5         2.8         3.4         2.0         1.8        2.85        3.25        3.50         2.5         3.5         4.0         2.5         2.5         2.5
         138           1          35           9           7          99       22.15       22.90       24.00          17          24          10         1.0         2.0         1.0         3.0         4.0         3.0         2.0         3.0         3.0         1.0         1.0         1.5         3.5         2.5         3.0         2.0         2.0         1.0    2.83    3.17    3.00    1.33    1.67    1.17         3.8         3.3         2.8         1.8         1.2         1.4        4.00        4.05        3.70         3.5         1.5         4.0         3.0         2.0         3.5
         139           1          36           8           4          99        9.40        9.30       11.00          30          29          27         1.5         1.0         1.5         2.0         2.0         2.5         1.5         1.5         2.0         1.5         1.5         1.0         2.0         2.0         2.0         2.0         4.0         4.0    1.83    1.83    2.17    1.67    2.17    2.17         2.4         3.2         2.9         2.9         3.4         2.4        2.75        2.90        3.25         5.0         5.0         5.0         4.0         3.0         4.0
         140           2          37          10           4          99       22.00       99.00       99.00          20          99          99         1.5        99.0        99.0         3.5        99.0        99.0         2.0        99.0        99.0         1.0        99.0        99.0         3.0        99.0        99.0         2.0        99.0        99.0    2.83   99.00   99.00    1.50   99.00   99.00         4.1        99.0        99.0         1.6        99.0        99.0        4.25       99.00       99.00         2.5        99.0        99.0         3.5        99.0        99.0
         141           1          59           9           4          99       23.15       24.70       23.75           8          10           5         1.0         1.0         1.0         3.0         3.0         2.5         2.5         2.0         4.0         1.0         1.0         1.0         3.0         3.5         3.5         2.0         2.0         1.0    2.83    2.83    3.33    1.33    1.33    1.00         3.3         3.7         4.1         1.5         1.1         1.0        3.90        4.30        4.55         2.0         2.0         1.5         4.5         4.5         4.5
         142           1          35           8           4          99       20.70       99.00       99.00          17          99          99         3.0        99.0        99.0         2.0        99.0        99.0         3.0        99.0        99.0         2.0        99.0        99.0         3.0        99.0        99.0         2.0        99.0        99.0    2.67   99.00   99.00    2.33   99.00   99.00         3.2        99.0        99.0         2.7        99.0        99.0        3.25       99.00       99.00         3.5        99.0        99.0         3.5        99.0        99.0
         143           1          18           7           3           1       20.75       99.00       99.00          14          99          99         1.5        99.0        99.0         2.5        99.0        99.0         3.0        99.0        99.0         2.0        99.0        99.0         3.0        99.0        99.0         2.0        99.0        99.0    2.83   99.00   99.00    1.83   99.00   99.00         4.0        99.0        99.0         2.4        99.0        99.0        3.80       99.00       99.00         3.5        99.0        99.0         3.0        99.0        99.0
         144           1          19           7           3           0       15.60       15.60       16.55          11          11          13         2.0         2.5         1.0         3.5         3.0         3.0         3.0         2.5         2.0         1.5         1.5         1.0         1.5         2.0         2.0         4.0         3.5         3.5    2.67    2.50    2.33    2.50    2.50    1.83         3.2         3.4         3.8         1.3         1.3         1.4        3.95        4.05        4.20         4.0         3.5         3.5         4.5         4.5         4.5
         145           2          21           7           3           0       12.15       10.85       99.00          19          19          99         2.0         1.0        99.0         2.5         2.0        99.0         2.0         2.5        99.0         2.5         1.5        99.0         1.5         2.0        99.0         4.0         4.0        99.0    2.00    2.17   99.00    2.83    2.17   99.00         2.8         3.2        99.0         3.3         3.7        99.0        2.75        2.75       99.00         4.0         5.0         4.0         2.0         1.5         1.5
         146           2          29           8           3           1       12.70       14.65       17.30          18          12           8         1.0         1.0         1.0         2.5         2.5         4.0         1.5         3.0         1.5         1.0         2.0         1.0         1.0         2.5         1.5         2.0         2.0         3.0    1.67    2.67    2.33    1.33    1.67    1.67         3.8         3.3         3.6         1.7         1.4         1.0        4.05        3.95        4.30         2.0         1.5         1.5         3.5         4.5         3.5
         147           1          48          10           4          99       19.30       22.20       22.15          21          10          10         1.0         1.0         1.0         3.0         1.0         2.0         1.5         1.0         2.0         1.0         1.5         2.0         3.0         2.0         1.0         1.0         1.0         2.0    2.50    1.33    1.67    1.00    1.17    1.67         4.0         4.3         3.8         1.1         1.2         1.6        4.45        4.55        4.10         4.5         4.5         4.0         3.0         3.0         3.0
         148           2          52           8           4          99       22.30       25.20       99.00          18          15          99         1.0         1.0        99.0         3.5         3.0        99.0         3.0         1.5        99.0         1.0         1.0        99.0         4.0         4.0        99.0         2.0         1.5        99.0    3.50    2.83   99.00    1.33    1.17   99.00         4.0         3.7        99.0         1.6         1.4        99.0        4.20        4.15       99.00         2.0         4.0        99.0         4.0         4.5        99.0
         149           1          22           7           3           1       14.65       14.60       18.75          12          13          11         1.0         1.5         2.0         3.0         3.0         3.0         2.5         3.0         3.0         1.5         1.5         1.5         2.0         2.0         2.5         2.5         2.0         3.0    2.50    2.67    2.83    1.67    1.67    2.17         3.5         4.0         4.3         3.3         2.0         2.1        3.10        4.00        4.10         3.5         3.5         3.0         3.5         4.5         4.5
         150           1          38           6           4          99       13.60       14.70       17.45          30          23          99         1.5         1.0        99.0         2.0         2.0        99.0         3.0         2.0        99.0         1.5         1.0        99.0         2.5         3.0        99.0         2.0         2.0        99.0    2.50    2.33   99.00    1.67    1.33   99.00         2.3         2.4        99.0         3.8         3.0        99.0        2.25        2.70       99.00         5.0         4.0         4.0         2.5         2.0         1.5
         151           1          24           7           3           1       19.85       21.75       22.20          15          25          10         1.0         2.0         1.0         3.5         3.0         3.0         2.5         3.0         3.0         1.5         1.5         1.0         3.0         3.0         3.0         2.0         2.0         2.5    3.00    3.00    3.00    1.50    1.83    1.50         4.3         4.7         4.8         1.7         1.7         1.5        4.30        4.50        4.65         2.5         2.0         2.0         4.5         4.5         5.0
         152           1          23          10           5          99       13.75       14.60       15.15          29          22          26         1.0         1.5         1.5         2.0         3.0         2.5         2.0         2.0         2.0         1.0         1.0         1.0         2.0         2.5         1.5         2.5         2.0         2.0    2.00    2.50    2.00    1.50    1.50    1.50         3.0         3.4         2.9         3.1         1.9         2.8        2.95        3.75        3.05         4.0         4.5         4.5         3.5         4.0         4.0
         153           1          24           8           3           1       17.95       21.95       99.00          13          14          99         1.0         1.0        99.0         4.0         2.5        99.0         2.0         1.5        99.0         1.0         1.0        99.0         3.5         3.0        99.0         2.5         1.0        99.0    3.17    2.33   99.00    1.50    1.00   99.00         4.0         4.3        99.0         2.6         2.1        99.0        3.70        4.10       99.00         4.0         3.0        99.0         4.0         3.0        99.0
         154           1          21           7           3           1       21.60       21.25       22.60          18          28          22         2.0         3.0         3.0         2.0         3.5         2.0         3.0         3.0         3.5         1.0         1.0         1.5         2.0         2.0         2.0         1.5         2.0         1.0    2.33    2.83    2.50    1.50    2.00    1.83         2.6         3.1         3.7         1.1         2.1         2.0        3.75        3.50        3.85         4.0         4.0         4.0         5.0         4.5         4.5
         155           1          23           7           3           0       17.35       99.00       99.00          21          99          99         1.0        99.0        99.0         3.0        99.0        99.0         2.0        99.0        99.0         2.0        99.0        99.0         2.0        99.0        99.0         3.5        99.0        99.0    2.33   99.00   99.00    2.17   99.00   99.00         3.7        99.0        99.0         1.7        99.0        99.0        4.00       99.00       99.00         3.0        99.0        99.0         4.0        99.0        99.0
         156           1          28           8           3           0       21.70       19.60       22.70          24          28          30         1.5         1.0         2.5         3.0         2.5         2.5         3.0         2.5         2.5         2.5         2.0         1.5         3.0         4.0         4.0         2.0         2.5         2.5    3.00    3.00    3.00    2.00    1.83    2.17         3.7         3.2         3.2         2.5         3.4         2.9        3.60        2.90        3.15         2.5         3.0         3.0         3.0         3.0         3.0
         157           1          20           7           3           0       12.40       99.00       99.00          28          99          99         2.5        99.0        99.0         2.0        99.0        99.0         2.0        99.0        99.0         1.5        99.0        99.0         2.5        99.0        99.0         3.0        99.0        99.0    2.17   99.00   99.00    2.33   99.00   99.00         2.4        99.0        99.0         2.8        99.0        99.0        2.80       99.00       99.00         4.0        99.0        99.0         3.5        99.0        99.0
         158           1          19           7           3           1       22.80       99.00       99.00           9          99          99         1.5        99.0        99.0         3.5        99.0        99.0         2.0        99.0        99.0         1.5        99.0        99.0         2.5        99.0        99.0         2.0        99.0        99.0    2.67   99.00   99.00    1.67   99.00   99.00         4.3        99.0        99.0         1.6        99.0        99.0        4.35       99.00       99.00         3.0         2.0        99.0         4.5         4.5        99.0
         159           1          20           7           3           1       17.15       15.25       15.15          26          25          25         2.0         2.0         2.5         2.5         2.0         2.0         2.5         2.0         3.0         2.0         1.5         1.5         2.0         2.0         2.0         2.0         3.0         2.5    2.33    2.00    2.33    2.00    2.17    2.17         3.1         2.7         3.3         2.7         2.8         2.5        3.20        2.95        3.40         4.0         4.5         4.5         3.0         3.0         3.0
         160           2          28           7           4          99       23.35       21.90       22.10           8          12           8         1.0         1.0         1.0         3.0         2.5         2.0         3.0         3.5         3.0         1.0         2.0         1.5         3.0         3.0         3.0         1.5         1.5         2.0    3.00    3.00    2.67    1.17    1.50    1.50         3.1         3.1         3.6         1.6         1.6         1.6        3.75        3.75        4.00         3.0         3.5         3.0         2.0         2.5         2.5
         161           1          22           7           3           0       11.70       12.20        9.25          23          27          29         2.0         1.0         2.0         1.0         2.0         2.0         1.5         2.0         3.5         2.5         1.5         2.0         2.0         2.5         2.0         3.0         4.0         3.5    1.50    2.17    2.50    2.50    2.17    2.50         2.0         3.5         2.2         1.8         2.0         3.1        3.10        3.75        2.55         4.0         4.5         4.5         3.0         3.0         2.5
         162           2          18           1           1          99       15.85       99.00       99.00          18          99          99         2.0        99.0        99.0         3.0        99.0        99.0         3.0        99.0        99.0         1.0        99.0        99.0         1.5        99.0        99.0         2.5        99.0        99.0    2.50   99.00   99.00    1.83   99.00   99.00         3.9        99.0        99.0         2.8        99.0        99.0        3.55       99.00       99.00         3.0        99.0        99.0         2.5        99.0        99.0
         163           2          27           8           4          99       23.10       19.80       20.30          11          16          12         1.0         1.0         1.0         3.5         3.0         2.0         3.0         1.0         1.5         1.5         1.0         2.0         3.0         2.5         1.5         2.0         2.0         2.5    3.17    2.17    1.67    1.50    1.33    1.83         3.5         3.6         3.6         2.0         1.5         1.3        3.75        4.05        4.15         2.0         2.0         2.0         3.0         3.0         3.0
         164           1          44           8           4          99       18.95       17.05       17.70          19          19          26         1.0         1.0         1.0         2.5         2.0         2.5         2.0         2.0         1.5         1.0         1.0         1.0         2.0         2.0         2.5         1.5         1.0         1.0    2.17    2.00    2.17    1.17    1.00    1.00         4.0         2.6         2.8         2.0         2.2         2.0        4.00        3.20        3.40         3.0         3.5         3.5         4.5         3.5         4.0
         165           1          49           8           5          99       26.85       99.00       99.00           8          99          99         1.0        99.0        99.0         3.5        99.0        99.0         3.0        99.0        99.0         1.0        99.0        99.0         3.0        99.0        99.0         1.0        99.0        99.0    3.17   99.00   99.00    1.00   99.00   99.00         3.9        99.0        99.0         1.4        99.0        99.0        4.25       99.00       99.00         2.0        99.0        99.0         4.5        99.0        99.0
         166           1          26           8           8           0       21.05       19.10       99.00          17          13          99         1.0         1.0        99.0         4.0         3.5        99.0         3.0         3.0        99.0         1.0         1.0        99.0         3.5         2.5        99.0         2.0         2.0        99.0    3.50    3.00   99.00    1.33    1.33   99.00         4.4         4.4        99.0         1.9         1.6        99.0        4.25        4.40       99.00         2.0         3.0        99.0         4.0         4.0        99.0
         167           1          36           8           3           0       14.65       18.60       99.00          24          25          99         1.0         1.0        99.0         2.0         3.0        99.0         1.5         1.5        99.0         1.0         2.0        99.0         2.5         3.5        99.0         2.5         2.5        99.0    2.00    2.67   99.00    1.50    1.83   99.00         2.7         2.7        99.0         2.9         2.6        99.0        2.90        3.05       99.00         5.0         4.5        99.0         3.0         3.5        99.0
         168           1          57           8           4          99       16.30       99.00       99.00          23          99          99         1.0        99.0        99.0         3.0        99.0        99.0         1.0        99.0        99.0         1.0        99.0        99.0         1.5        99.0        99.0         1.0        99.0        99.0    1.83   99.00   99.00    1.00   99.00   99.00         3.8        99.0        99.0         2.3        99.0        99.0        3.75       99.00       99.00         4.5        99.0        99.0         3.5        99.0        99.0
         169           1          21           7           3           1       18.15       21.35       18.90          28          17          17         2.0         1.5         1.0         3.0         4.0         4.0         2.5         3.0         4.0         1.0         1.0         2.0         3.0         3.0         1.0         3.5         3.0         1.0    2.83    3.33    3.00    2.17    1.83    1.33         1.9         2.4         2.8         2.6         2.0         1.6        2.65        3.20        3.60         4.5         4.5         4.5         4.0         4.0         4.5
         170           1          37           6           4          99       14.55       99.00       99.00          15          99          99         1.0        99.0        99.0         2.5        99.0        99.0         2.0        99.0        99.0         1.0        99.0        99.0         2.5        99.0        99.0         2.5        99.0        99.0    2.33   99.00   99.00    1.50   99.00   99.00         3.6        99.0        99.0         3.7        99.0        99.0        2.95       99.00       99.00         5.0         4.0        99.0         4.0         3.5        99.0
         171           1          21           7           3           1       26.50       99.00       99.00          12          99          99         1.5        99.0        99.0         3.5        99.0        99.0         4.0        99.0        99.0         1.5        99.0        99.0         3.0        99.0        99.0         2.0        99.0        99.0    3.50   99.00   99.00    1.67   99.00   99.00         3.8        99.0        99.0         1.1        99.0        99.0        4.35       99.00       99.00         2.0         2.0        99.0         4.0         3.5        99.0
         172           2          54          10           4          99       18.40       18.50       19.45          14          16          13         2.0         2.0         1.0         2.0         1.5         2.0         3.0         2.0         3.0         1.5         1.5         1.0         3.0         2.0         3.0         2.0         2.0         2.0    2.67    1.83    2.67    1.83    1.83    1.33         2.8         2.3         3.0         1.8         1.9         1.4        3.50        3.20        3.80         3.0         4.0         4.0         3.0         3.5         3.5
         173           1          51           6           4          99       23.50       99.00       22.00          14          99          14         2.0        99.0         1.5         2.0        99.0         2.0         2.5        99.0         2.5         3.0        99.0         1.5         2.0        99.0         2.0         1.0        99.0         1.0    2.17   99.00    2.17    2.00   99.00    1.33         3.5        99.0         3.6         1.9        99.0         2.1        3.80       99.00        3.75         3.5        99.0         3.0         4.0        99.0         4.0
         174           1          35           4           4          99       11.95       10.45        9.50          29          34          25         3.0         4.0         3.0         2.0         2.0         2.0         2.0         2.0         2.0         2.0         2.5         1.5         2.5         2.0         2.0         3.5         4.0         3.0    2.17    2.00    2.00    2.83    3.50    2.50         3.0         2.7         3.2         3.4         4.1         2.6        2.80        2.30        3.30         4.0         5.0         4.0         3.0         3.0         2.5
         175           1          38           6           4          99       10.70       11.10       19.45          28          28          24         1.5         2.5         1.0         3.5         1.5         4.0         3.0         2.0         2.5         2.0         3.0         1.0         2.0         1.5         3.5         4.0         4.0         2.0    2.83    1.67    3.33    2.50    3.17    1.33         1.9         1.5         3.9         3.2         3.3         1.9        2.35        2.10        4.00         4.5         4.5         4.0         4.5         3.5         4.0
         176           1          20           7           3           1       19.90       17.30       18.20          14          17          14         1.5         2.0         1.0         2.5         2.5         3.0         3.0         3.0         3.0         1.0         1.0         1.5         3.0         3.0         2.5         2.0         2.0         2.5    2.83    2.83    2.83    1.50    1.67    1.67         3.6         3.4         3.1         1.7         1.9         1.9        3.95        3.75        3.60         4.0         4.0         4.0         3.0         3.0         3.0
         177           1          27           8           3           0       21.15       22.65       21.75          18          15          12         1.5         1.5         1.5         4.0         3.0         4.0         3.0         3.0         2.5         1.0         1.0         1.5         3.5         2.0         3.5         2.5         1.5         2.5    3.50    2.67    3.33    1.67    1.33    1.83         4.0         3.9         4.0         2.2         2.4         2.1        3.90        3.75        3.95         3.0         3.0         2.5         2.5         3.0         3.0
         178           1          22           7           3           0       17.65       16.60       99.00          27          24          99         1.0         1.0        99.0         2.0         1.5        99.0         2.5         3.0        99.0         2.0         2.5        99.0         2.0         2.5        99.0         3.5         3.0        99.0    2.17    2.33   99.00    2.17    2.17   99.00         3.1         3.3        99.0         2.5         2.3        99.0        3.30        3.50       99.00         3.5         4.0        99.0         3.5         3.0        99.0
         179           1          25           7           3           0       28.80       30.00       99.00           7           9          99         1.0         1.0        99.0         4.0         4.0        99.0         4.0         4.0        99.0         1.5         1.0        99.0         4.0         4.0        99.0         1.5         1.0        99.0    4.00    4.00   99.00    1.33    1.00   99.00         5.0         5.0        99.0         1.2         1.2        99.0        4.90        4.90       99.00         2.5         2.5         2.5         4.5         5.0         5.0
         180           1          20           7           3           0       18.20       16.20       19.25          23          14          21         1.5         2.0         2.0         2.5         2.0         3.0         2.5         3.5         1.5         1.0         3.0         2.0         3.5         2.5         3.0         2.0         2.5         2.0    2.83    2.67    2.50    1.50    2.50    2.00         3.1         3.6         3.5         3.3         2.1         1.6        2.90        3.75        3.95         3.0         3.0         2.0         3.5         3.0         2.0
         181           2          27          10           5          99       18.15       99.00       99.00          18          99          99         1.0        99.0        99.0         3.0        99.0        99.0         4.0        99.0        99.0         1.5        99.0        99.0         3.0        99.0        99.0         3.0        99.0        99.0    3.33   99.00   99.00    1.83   99.00   99.00         3.1        99.0        99.0         2.5        99.0        99.0        3.30       99.00       99.00         3.0         2.0        99.0         2.5         3.0        99.0
         182           1          24           7           3           0       16.05       18.95       99.00          27          30          99         1.5         1.5        99.0         3.0         3.0        99.0         2.0         2.0        99.0         1.0         2.0        99.0         3.0         2.0        99.0         3.0         3.5        99.0    2.67    2.33   99.00    1.83    2.33   99.00         3.4         2.7        99.0         3.1         3.4        99.0        3.15        2.65       99.00         4.0         3.5        99.0         4.0         3.5        99.0
         183           2          26           8           4          99       14.90       17.95       99.00          28          18          99        99.0         2.5        99.0        99.0         2.0        99.0        99.0         3.0        99.0        99.0         2.0        99.0        99.0         2.0        99.0        99.0         3.0        99.0   99.00    2.33   99.00   99.00    2.50   99.00        99.0         3.0        99.0        99.0         3.0        99.0       99.00        3.00       99.00         3.0         2.5        99.0         5.0         2.5        99.0
         184           1          57           8           8           0       24.60       25.10       23.30          11          15           6         1.0         1.0         1.0         3.0         4.0         3.5         3.5         3.0         3.5         1.5         1.0         1.5         3.5         2.5         3.5         1.0         1.5         2.0    3.33    3.17    3.50    1.17    1.17    1.50         4.6         4.3         4.3         1.6         1.5         1.2        4.50        4.40        4.55         2.0         2.0         2.0         4.5         5.0         5.0
         185           1          31           4           4          99       21.20       18.55       19.30          20          22          19         1.0         1.0         1.0         3.0         2.5         2.0         2.5         2.0         1.5         1.5         1.5         1.5         2.0         2.0         2.0         2.0         2.5         1.0    2.50    2.17    1.83    1.50    1.67    1.17         2.9         2.2         3.0         1.2         1.1         1.4        3.85        3.55        3.80         3.0         3.0         3.0         5.0         5.0         5.0
         186           1          81           1           1          99       21.60       19.95       99.00          22          26          99         1.0         1.5        99.0         2.0         2.0        99.0         3.5         3.5        99.0         2.0         2.5        99.0         2.0         1.5        99.0         1.0         2.0        99.0    2.50    2.33   99.00    1.33    2.00   99.00         2.6         2.4        99.0         1.8         1.6        99.0        3.40        3.40       99.00         2.0         2.0        99.0         3.0         3.0        99.0
         187           2          25           7           3           0       25.35       24.40       99.00          12           9          99         1.0         1.0        99.0         4.0         4.0        99.0         3.0         2.0        99.0         1.0         1.0        99.0         3.5         4.0        99.0         1.5         1.0        99.0    3.50    3.33   99.00    1.17    1.00   99.00         3.5         3.8        99.0         1.4         1.2        99.0        4.05        4.30       99.00         4.0         3.5         3.5         4.5         4.0         4.5
         188           2          33           8           5          99       22.65       99.00       99.00          19          99          99         1.0        99.0        99.0         2.5        99.0        99.0         3.5        99.0        99.0         1.5        99.0        99.0         3.0        99.0        99.0         2.0        99.0        99.0    3.00   99.00   99.00    1.50   99.00   99.00         3.5        99.0        99.0         1.4        99.0        99.0        4.05       99.00       99.00         3.0        99.0        99.0         3.5        99.0        99.0
         189           1          24           8           3           0       25.45       23.70       99.00           6          11          99         1.0         1.5        99.0         4.0         4.0        99.0         3.0         4.0        99.0         1.0         1.0        99.0         4.0         4.0        99.0         1.0         2.5        99.0    3.67    4.00   99.00    1.00    1.67   99.00         4.5         4.9        99.0         1.0         1.3        99.0        4.75        4.80       99.00         2.5         2.0        99.0         5.0         4.0        99.0
         190           1          27           7           3           0       24.25       23.90       25.05          14          10          12         1.0         1.0         1.0         4.0         2.5         3.5         3.0         3.0         3.0         1.0         1.0         1.5         4.0         4.0         4.0         2.0         1.5         2.5    3.67    3.17    3.50    1.33    1.17    1.67         4.1         3.4         3.7         1.7         1.4         1.4        4.20        4.00        4.15         3.0         2.5         3.0         4.0         4.0         4.5
         191           1          25           7           3           0       14.85       13.50       13.85          31          29          25         1.5         1.0         2.5         2.0         3.0         3.0         2.0         2.0         2.0         2.0         1.5         2.5         2.0         2.0         1.5         2.5         3.5         4.0    2.00    2.33    2.17    2.00    2.00    3.00         3.3         3.8         3.7         3.3         2.8         2.0        3.00        3.50        3.85         3.5         3.5         3.0         3.5         3.5         3.5
         192           1          26           9           4          99       20.50       99.00       99.00          15          99          99         2.0        99.0        99.0         3.5        99.0        99.0         2.5        99.0        99.0         1.0        99.0        99.0         2.0        99.0        99.0         2.0        99.0        99.0    2.67   99.00   99.00    1.67   99.00   99.00         3.5        99.0        99.0         1.2        99.0        99.0        4.15       99.00       99.00         3.0        99.0        99.0         4.0        99.0        99.0
         193           1          29           8           4          99       19.55       99.00       99.00          16          99          99         2.0        99.0        99.0         3.0        99.0        99.0         1.0        99.0        99.0         1.0        99.0        99.0         2.5        99.0        99.0         2.0        99.0        99.0    2.17   99.00   99.00    1.67   99.00   99.00         3.8        99.0        99.0         1.4        99.0        99.0        4.20       99.00       99.00         2.5        99.0        99.0         3.5        99.0        99.0
         194           2          28           8           4          99       14.40       15.90       16.45          19          22          13         1.0         1.0         2.0         2.5         3.0         2.5         3.0         2.5         2.5         1.5         1.5         1.5         2.5         2.5         3.0         2.5         3.0         2.5    2.67    2.67    2.67    1.67    1.83    2.00         4.3         3.9         4.3         1.5         2.1         2.4        4.40        3.90        3.95         4.0         4.0         4.0         4.0         4.0         3.5
         195           1          25           7           3           0       11.95       12.35       18.15          30          26          26         2.5         1.5         1.0         2.0         3.0         3.0         2.0         2.0         3.0         1.5         1.5         2.5         2.0         3.0         3.5         3.0         2.0         2.0    2.00    2.67    3.17    2.33    1.67    1.83         3.3         3.2         4.2         3.2         2.9         2.9        3.05        3.15        3.65         3.5         4.0         3.5         5.0         4.0         5.0
         196           1          35           8           4          99       21.65       24.20       23.85          12          13           9         1.0         1.0         1.0         4.0         4.0         3.0         4.0         4.0         4.0         1.5         2.5         1.5         4.0         3.5         3.0         2.0         1.0         1.0    4.00    3.83    3.33    1.50    1.50    1.17         4.3         4.6         4.4         1.7         1.9         1.8        4.30        4.35        4.30         2.5         2.5         2.5         4.0         3.5         3.5
         197           1          26           9           4          99       16.85       16.20       99.00          14          12          99         4.0         3.0        99.0         2.0         3.0        99.0         1.5         3.0        99.0         1.5         1.0        99.0         2.5         2.5        99.0         4.0         3.5        99.0    2.00    2.83   99.00    3.17    2.50   99.00         4.2         3.6        99.0         1.3         1.5        99.0        4.45        4.05       99.00         3.5         3.5        99.0         4.0         3.5        99.0
         198           2          27           8           3           0       21.15       99.00       99.00          24          99          99         1.0        99.0        99.0         4.0        99.0        99.0         3.5        99.0        99.0         4.0        99.0        99.0         3.0        99.0        99.0         1.0        99.0        99.0    3.50   99.00   99.00    2.00   99.00   99.00         4.0        99.0        99.0         1.7        99.0        99.0        4.15       99.00       99.00         3.0        99.0        99.0         4.0        99.0        99.0
         199           1          26           8           3           0       15.60       14.30       13.65          25          25          30         1.5         1.0         1.0         2.0         3.0         2.5         1.5         2.0         2.0         1.5         1.5         1.5         2.0         1.5         1.5         2.0         1.5         4.0    1.83    2.17    2.00    1.67    1.33    2.17         3.2         2.0         1.7         3.4         2.7         2.7        2.90        2.65        2.50         4.5         4.0         4.0         3.5         3.0         4.5
         200           1          26           7           3           0       20.40       18.90       17.55          24          24          21         1.0         1.0         1.0         3.0         2.0         3.0         2.0         2.0         2.5         1.0         2.0         1.0         1.5         1.0         2.0         2.5         2.5         2.0    2.17    1.67    2.50    1.50    1.83    1.33         3.1         3.0         3.3         2.6         2.8         2.6        3.25        3.10        3.35         2.0         2.0         2.0         3.5         3.5         3.5
         201           1          27           8           7          99       24.05       24.75       24.35          12          13           6         1.0         2.0         1.0         2.5         3.0         3.0         2.0         2.0         2.0         1.0         1.0         1.5         3.0         2.0         1.5         1.0         1.0         1.0    2.50    2.33    2.17    1.00    1.33    1.17         3.7         3.8         3.5         1.9         3.6         1.0        3.90        3.10        4.25         3.5         3.0         2.0         2.5         2.5         3.0
         202           2          20           7           3           0       17.25       18.25       99.00          22          14          99         3.5         3.5        99.0         2.5         3.5        99.0         3.0         4.0        99.0         2.0         1.0        99.0         3.5         4.0        99.0         4.0         4.0        99.0    3.00    3.83   99.00    3.17    2.83   99.00         3.2         3.8        99.0         2.5         3.3        99.0        3.35        3.25       99.00         3.5         3.0        99.0         3.5         3.0        99.0
         203           2          19           7           3           0       18.75       18.60       18.70           8           7          12         1.0         1.0         1.0         3.0         3.0         3.5         1.5         1.5         3.0         1.0         1.0         1.0         3.5         2.5         2.0         2.5         2.0         2.0    2.67    2.33    2.83    1.50    1.33    1.33         4.5         4.0         4.0         1.4         1.4         1.7        4.55        4.30        4.15         1.0         2.0         1.0         5.0         4.5         5.0
         204           2          26           7           4          99       27.45       24.55       23.05           2          11          10         1.0         1.5         1.0         2.5         3.5         4.0         4.0         3.0         3.5         1.0         1.5         1.0         4.0         3.5         2.5         1.5         2.0         2.5    3.50    3.33    3.33    1.17    1.67    1.50         4.6         3.9         3.9         1.4         1.8         1.2        4.60        4.05        4.35         1.5         2.5         1.5         4.0         4.5         4.5
         205           2          29           8           3           0       17.25       21.10       20.85          12          18          15         1.5         1.5         1.5         3.0         4.0         3.5         2.5         3.0         3.0         1.0         1.0         1.0         3.0         3.0         3.0         2.0         2.0         2.0    2.83    3.33    3.17    1.50    1.50    1.50         3.5         3.4         4.0         1.5         2.3         1.3        4.00        3.55        4.35         4.0         3.0         2.5         4.5         4.0         4.5
         206           1          63           3           4          99       21.75       16.30       18.65          21          29          13         4.0         4.0         1.0         3.5         3.0         4.0         3.5         2.5         2.5         1.0         2.0         1.0         3.5         2.5         4.0         3.5         2.5         4.0    3.50    2.67    3.50    2.83    2.83    2.00         4.7         2.8         4.8         1.7         3.1         3.2        4.50        2.85        3.80         1.0         1.0         1.0         5.0         5.0         5.0
         207           1          26          10           4          99       15.20       21.45       18.45          28          15          14         1.0         1.0         1.0         1.5         3.5         2.5         3.0         3.0         4.0         2.0         1.5         1.5         3.0         2.0         2.5         1.5         1.0         1.0    2.50    2.83    3.00    1.50    1.17    1.17         3.3         3.7         3.6         1.8         1.9         1.0        3.75        3.90        4.30         3.5         2.0         2.0         3.0         4.5         3.5
         208           1          22           7           5          99       22.20       99.00       99.00          14          99          99         1.0        99.0        99.0         2.5        99.0        99.0         2.0        99.0        99.0         1.5        99.0        99.0         3.5        99.0        99.0         1.0        99.0        99.0    2.67   99.00   99.00    1.17   99.00   99.00         2.8        99.0        99.0         1.5        99.0        99.0        3.65       99.00       99.00         2.0        99.0        99.0         1.0        99.0        99.0
         209           2          27           7           3           0       23.55       20.05       20.75          15          17          19         1.0         1.0         2.0         3.0         3.5         3.0         3.0         2.0         3.0         1.5         1.5         2.0         3.5         2.5         3.5         2.0         2.5         1.5    3.17    2.67    3.17    1.50    1.67    1.83         3.6         3.6        99.0         2.1         2.3        99.0        3.75        3.65       99.00         2.0         2.0         2.5         3.0         3.0         3.0
         210           1          26           7           3           1       15.60       17.55       17.35          21          17          19         1.0         1.0         1.0         2.0         2.0         2.0         2.0         2.5         2.5         1.5         1.0         1.0         1.5         2.0         1.0         1.5         1.5         1.5    1.83    2.17    1.83    1.33    1.17    1.17         2.5         2.7         2.1         1.7         1.9         1.8        3.40        3.40        3.15         4.0         4.0         4.0         3.0         3.0         2.5
         211           2          34          10           5          99       15.70       15.15       16.30          19          13          14         1.0         1.0         1.0         4.0         2.0         3.5         1.0         1.0         1.0         1.0         1.0         1.0         4.0         3.0         2.5         2.0         1.5         2.0    3.00    2.00    2.33    1.33    1.17    1.33         3.9         3.1         3.7         3.0         2.1         2.1        3.45        3.50        3.80         5.0         4.0         4.5         3.0         4.0         4.5
         212           2          23           7           3           0       19.15       99.00       99.00          26          99          99         1.0        99.0        99.0         2.0        99.0        99.0         3.0        99.0        99.0         1.0        99.0        99.0         3.0        99.0        99.0         2.0        99.0        99.0    2.67   99.00   99.00    1.33   99.00   99.00         3.1        99.0        99.0         2.1        99.0        99.0        3.50       99.00       99.00         2.5        99.0        99.0         2.0        99.0        99.0
         213           1          29           8           4          99       23.30       99.00       99.00          16          99          99         1.5        99.0        99.0         3.5        99.0        99.0         2.5        99.0        99.0         1.0        99.0        99.0         3.5        99.0        99.0         2.0        99.0        99.0    3.17   99.00   99.00    1.50   99.00   99.00         4.0        99.0        99.0         2.2        99.0        99.0        3.90       99.00       99.00         4.0        99.0        99.0         3.0        99.0        99.0
         214           1          21           7           3           1       12.30       14.70       99.00          20          26          99         1.0         2.5        99.0         3.0         3.5        99.0         2.0         2.0        99.0         1.0         1.0        99.0         3.0         3.0        99.0         3.0         3.5        99.0    2.67    2.83   99.00    1.67    2.33   99.00         3.2         3.4        99.0         2.3         2.4        99.0        3.45        3.50       99.00         2.5         3.0        99.0         4.5         4.0        99.0
         215           1          20           7           3           0       15.80       16.95       16.35          22          17          19         1.0         1.0         1.0         1.5         1.5         2.0         2.5         2.5         2.5         2.0         2.0         2.0         3.0         3.0         3.0         2.0         3.0         2.5    2.33    2.33    2.50    1.67    2.00    1.83         3.4         3.7         4.1         2.3         2.2         2.5        3.55        3.75        3.80         4.5         4.0         4.0         3.5         3.0         3.5
         216           1          33           8           4          99       18.15       20.00       19.15          16          11          99         1.0         1.0        99.0         3.0         1.0        99.0         2.0         1.0        99.0         1.0         1.0        99.0         4.0         2.0        99.0         1.5         1.0        99.0    3.00    1.33   99.00    1.17    1.00   99.00         3.3         2.8        99.0         2.0         1.7        99.0        3.65        3.55       99.00         4.5         3.5         4.0         2.0         3.0         2.5
         217           1          23           7           2          99       27.30       99.00       26.70           7          99           8         1.0        99.0         1.5         4.0        99.0         3.5         4.0        99.0         1.5         1.0        99.0         1.0         4.0        99.0         3.5         1.0        99.0         1.0    4.00   99.00    2.83    1.00   99.00    1.17         4.1        99.0         4.0         1.3        99.0         1.4        4.40       99.00        4.30         1.0        99.0         1.5         4.0        99.0         3.5
         218           1          46           8           8           0       18.60       99.00       99.00          12          99          99         1.5        99.0        99.0         3.5        99.0        99.0         3.5        99.0        99.0         1.0        99.0        99.0         2.5        99.0        99.0         2.0        99.0        99.0    3.17   99.00   99.00    1.50   99.00   99.00         4.0        99.0        99.0         2.5        99.0        99.0        3.75       99.00       99.00         4.0        99.0        99.0         3.5        99.0        99.0
         219           1          50          10           4          99       17.00       17.00       15.90          25          21          20         1.0         1.0         1.5         3.0         3.0         3.0         1.5         2.5         1.5         2.0         1.0         1.0         2.0         2.5         2.0         3.5         2.5         3.0    2.17    2.67    2.17    2.17    1.50    1.83         3.8         3.2         3.7         3.4         3.3         3.5        3.20        2.95        3.10         4.0         4.0         4.0         4.0         4.0         4.0
         220           1          29           6           5          99       15.95       99.00       17.65          15          99          28         1.0        99.0         2.0         3.5        99.0         4.0         2.0        99.0         3.0         1.5        99.0         1.5         3.0        99.0         2.5         2.5        99.0         2.5    2.83   99.00    3.17    1.67   99.00    2.00         3.6        99.0         3.8         2.2        99.0         2.2        3.70       99.00        3.80         4.0        99.0         4.0         3.5        99.0         3.5
         221           1          20           8           3           0       20.95       99.00       99.00          13          99          99         2.0        99.0        99.0         2.0        99.0        99.0         2.0        99.0        99.0         2.0        99.0        99.0         2.5        99.0        99.0         2.0        99.0        99.0    2.17   99.00   99.00    2.00   99.00   99.00         2.4        99.0        99.0         1.3        99.0        99.0        3.55       99.00       99.00         2.5        99.0        99.0         2.0        99.0        99.0
         222           2          19           7           3           0       18.25       99.00       99.00          17          99          99         1.0        99.0        99.0         2.0        99.0        99.0         3.5        99.0        99.0         1.0        99.0        99.0         1.5        99.0        99.0         3.0        99.0        99.0    2.33   99.00   99.00    1.67   99.00   99.00         3.4        99.0        99.0         1.8        99.0        99.0        3.80       99.00       99.00         3.0         4.0        99.0         3.0         3.0        99.0
         223           2          18           7           3           0       21.75       99.00       99.00          13          99          99         1.5        99.0        99.0         2.5        99.0        99.0         3.5        99.0        99.0         2.0        99.0        99.0         4.0        99.0        99.0         1.5        99.0        99.0    3.33   99.00   99.00    1.67   99.00   99.00         3.1        99.0        99.0         1.5        99.0        99.0        3.80       99.00       99.00         1.0        99.0        99.0         3.5        99.0        99.0
         224           2          25           7           3           0       19.65       19.10       19.60          14          11          11         1.0         1.0         1.0         4.0         3.5         3.0         2.5         3.0         2.5         1.0         1.0         1.0         3.5         3.0         2.5         1.5         1.5         2.0    3.33    3.17    2.67    1.17    1.17    1.33         4.2         3.9         4.2         2.3         1.9         2.0        3.95        4.00        4.10         2.5         4.0         2.5         4.5         4.5         4.5
         225           1          23           7           4          99       20.25       15.90       99.00          21          21          99         1.0         1.0        99.0         2.0         2.5        99.0         1.0         1.0        99.0         2.0         1.0        99.0         1.5         2.0        99.0         1.5         2.5        99.0    1.50    1.83   99.00    1.50    1.50   99.00         3.6         3.5        99.0         2.6         3.2        99.0        3.50        3.15       99.00         2.5         2.5        99.0         3.0         3.0        99.0
         226           2          48           8           7          99       18.15       19.00       20.40          22          18          18         2.0         1.0         1.0         1.5         2.0         2.0         1.0         1.5         1.0         2.5         2.5         2.5         1.5         1.5         2.0         3.0         3.0         3.0    1.33    1.67    1.67    2.50    2.17    2.17         3.1         3.2         3.1         3.4         2.5         2.3        2.85        3.35        3.40         3.5         4.0         4.0         3.0         3.0         3.0
         227           1          23           7           3           0       21.90       99.00       99.00          18          99          99         1.0        99.0        99.0         3.0        99.0        99.0         2.5        99.0        99.0         1.0        99.0        99.0         2.5        99.0        99.0         2.0        99.0        99.0    2.67   99.00   99.00    1.33   99.00   99.00         2.5        99.0        99.0         1.4        99.0        99.0        3.55       99.00       99.00         2.0         2.5        99.0         4.0         3.0        99.0
         228           1          26           7           2          99       18.35       99.00       99.00          22          99          99         1.0        99.0        99.0         3.0        99.0        99.0         3.0        99.0        99.0         1.5        99.0        99.0         3.5        99.0        99.0         2.0        99.0        99.0    3.17   99.00   99.00    1.50   99.00   99.00         3.8        99.0        99.0         1.8        99.0        99.0        4.00       99.00       99.00         2.5         3.0        99.0         2.5        99.0        99.0
         229           2          30          10           6          99       16.65       99.00       99.00          21          99          99         1.0        99.0        99.0         2.0        99.0        99.0         3.5        99.0        99.0         1.5        99.0        99.0         1.5        99.0        99.0         2.5        99.0        99.0    2.33   99.00   99.00    1.67   99.00   99.00         2.8        99.0        99.0         2.5        99.0        99.0        3.15       99.00       99.00         3.5        99.0        99.0         2.5        99.0        99.0
         230           1          25           7           3           0       14.95       99.00       99.00          14          99          99         2.0        99.0        99.0         2.5        99.0        99.0         2.0        99.0        99.0         2.5        99.0        99.0         2.5        99.0        99.0         3.0        99.0        99.0    2.33   99.00   99.00    2.50   99.00   99.00         3.8        99.0        99.0         2.3        99.0        99.0        3.75       99.00       99.00         4.5        99.0        99.0         4.0        99.0        99.0
         231           1          31           6           6          99       21.65       99.00       15.70          15          99          21         1.5        99.0        99.0         3.5        99.0        99.0         4.0        99.0        99.0         1.0        99.0        99.0         3.5        99.0        99.0         2.0        99.0        99.0    3.67   99.00   99.00    1.50   99.00   99.00         4.4        99.0        99.0         2.1        99.0        99.0        4.15       99.00       99.00         3.5        99.0         4.5         3.0        99.0         3.0
         232           1          23           6           3           0       22.95       21.65       23.20          15          20          19         1.0         1.0         1.5         3.0         3.5         4.0         3.5         3.0         4.0         1.0         1.0         1.0         4.0         2.5         3.0         2.0         2.0         1.0    3.50    3.00    3.67    1.33    1.33    1.17         3.5         2.1         2.4         1.4         1.6         1.6        4.05        3.25        3.40         3.5         4.0         4.0         3.5         3.0         3.5
         233           1          27           7           3           0       26.05       99.00       99.00           8          99          99         1.0        99.0        99.0         3.0        99.0        99.0         3.0        99.0        99.0         1.0        99.0        99.0         3.0        99.0        99.0         1.0        99.0        99.0    3.00   99.00   99.00    1.00   99.00   99.00         3.8        99.0        99.0         1.5        99.0        99.0        4.15       99.00       99.00         2.0         1.0        99.0         4.0         3.5        99.0
         234           1          21           7           3           0       19.20       16.65       16.35          24          23          99         1.0         1.5        99.0         1.5         3.0        99.0         2.0         2.0        99.0         2.0         2.0        99.0         2.0         1.5        99.0         1.5         2.0        99.0    1.83    2.17   99.00    1.50    1.83   99.00         1.9         3.1        99.0         2.8         2.1        99.0        2.55        3.50       99.00         3.5         3.5         3.5         3.5         3.5         3.5
         235           1          29           8           3           0       16.50       16.70       18.35          28          26          24         2.5         1.0         2.0         2.0         2.0         3.0         2.5         2.5         2.0         1.5         1.5         1.5         2.0         2.0         2.0         2.5         2.0         2.0    2.17    2.17    2.33    2.17    1.50    1.83         2.8         2.9         3.2         2.7         2.5         2.8        3.05        3.20        3.20         3.5         3.5         3.5         3.0         3.5         3.5
         236           2          23           8           3           0       17.25       20.15       99.00          11          17          99         1.0         1.5        99.0         4.0         4.0        99.0         3.5         2.0        99.0         1.0         1.5        99.0         4.0         3.0        99.0         3.5         2.0        99.0    3.83    3.00   99.00    1.83    1.67   99.00         4.3         3.8        99.0         1.7         1.6        99.0        4.30        4.10       99.00         3.0         1.5        99.0         1.5         4.0        99.0
         237           1          24           8           3           0       15.60       99.00       99.00          21          99          99         2.0        99.0        99.0         2.5        99.0        99.0         2.0        99.0        99.0         1.5        99.0        99.0         2.0        99.0        99.0         2.5        99.0        99.0    2.17   99.00   99.00    2.00   99.00   99.00         4.1        99.0        99.0         2.2        99.0        99.0        3.95       99.00       99.00         2.0        99.0        99.0         4.5        99.0        99.0
         238           1          19           7           3           0       16.45       99.00       13.95          22          99          99         4.0        99.0        99.0         3.5        99.0        99.0         3.0        99.0        99.0         2.0        99.0        99.0         3.5        99.0        99.0         2.5        99.0        99.0    3.33   99.00   99.00    2.83   99.00   99.00         3.9        99.0        99.0         2.7        99.0        99.0        3.60       99.00       99.00         4.5         3.0         5.0         2.0         2.0         2.0
         239           1          50           3           7          99       26.25       25.85       99.00           3           4          99         1.0         1.0        99.0         3.5         3.5        99.0         3.5         4.0        99.0         1.5         1.0        99.0         3.5         4.0        99.0         1.0         1.0        99.0    3.50    3.83   99.00    1.17    1.00   99.00         4.1         4.5        99.0         1.4         1.7        99.0        4.35        4.40       99.00         2.0         2.0        99.0         4.0         3.5        99.0
         240           1          27          10           7          99       15.35       99.00       99.00          32          99          99         3.5        99.0        99.0         3.0        99.0        99.0         2.0        99.0        99.0         1.0        99.0        99.0         2.5        99.0        99.0         3.0        99.0        99.0    2.50   99.00   99.00    2.50   99.00   99.00         2.4        99.0        99.0         3.8        99.0        99.0        2.30       99.00       99.00         4.5        99.0         3.5         3.0        99.0         3.0
         241           1          23           6           3           0       16.45       17.05       16.85          17          16          18         1.5         1.0         1.0         3.0         3.0         3.0         2.0         2.5         3.0         1.0         1.0         1.5         2.0         3.0         2.5         3.5         2.0         2.0    2.33    2.83    2.83    2.00    1.33    1.50         3.2         3.1         3.1         2.7         2.5         2.7        3.25        3.30        3.20         4.0         4.5         4.5         3.0         3.5         2.5
         242           1          22           6           2          99       17.15       99.00       99.00          22          99          99         2.0        99.0        99.0         3.0        99.0        99.0         2.5        99.0        99.0         1.0        99.0        99.0         2.0        99.0        99.0         2.5        99.0        99.0    2.50   99.00   99.00    1.83   99.00   99.00         3.3        99.0        99.0         3.3        99.0        99.0        3.00       99.00       99.00         3.0         2.0         3.0         3.5         3.5         3.5
         243           1          22           6           3           0       10.90       99.00       99.00          30          99          99         1.0        99.0        99.0         2.5        99.0        99.0         2.5        99.0        99.0         1.0        99.0        99.0         1.5        99.0        99.0         2.5        99.0        99.0    2.17   99.00   99.00    1.50   99.00   99.00         3.3        99.0        99.0         3.6        99.0        99.0        2.85       99.00       99.00         4.5        99.0        99.0         2.0        99.0        99.0
         244           1          40           8           4          99       21.25       23.75       25.75          18           8           9         2.0         2.0         1.0         3.0         3.0         4.0         3.0         3.0         2.5         1.5         1.0         1.0         2.0         3.0         3.5         1.0         1.0         1.0    2.67    3.00    3.33    1.50    1.33    1.00         4.0         3.7         4.0         2.0         1.6         1.5        4.00        4.05        4.25         2.0         2.0         2.0         3.0         3.5         3.5
         245           3          25           7           3           0       24.10       99.00       99.00          16          99          99         1.0        99.0        99.0         2.0        99.0        99.0         4.0        99.0        99.0         1.0        99.0        99.0         2.5        99.0        99.0         2.0        99.0        99.0    2.83   99.00   99.00    1.33   99.00   99.00         3.4        99.0        99.0         1.4        99.0        99.0        4.00       99.00       99.00         2.5        99.0        99.0         2.5        99.0        99.0
         246           1          23           7           3           0       21.40       21.35       21.10          16          21          16         1.0         1.0         2.0         2.0         3.5         3.5         2.0         2.0         2.0         1.0         1.0         1.5         3.5         2.5         3.0         2.0         2.0         1.0    2.50    2.67    2.83    1.33    1.33    1.50         3.7         3.3         4.0         1.1         1.4         1.3        4.30        3.95        4.35         2.0         2.0         2.0         3.5         3.0         3.5
         247           1          24           7           3           1       22.95       21.50       22.75           8          14          13         1.0         1.5         1.5         3.0         3.0         3.5         3.0         3.0         3.0         1.5         1.0         1.0         3.0         3.5         3.0         1.5         1.5         1.5    3.00    3.17    3.17    1.33    1.33    1.33         3.4         3.6         3.7         1.6         1.7         1.5        3.90        3.95        4.10         3.0         2.5         3.0         4.0         4.0         4.0
         248           1          24           7           3           0       17.10       18.15       99.00          17          23          99         1.0         1.0        99.0         3.0         4.0        99.0         1.0         2.0        99.0         1.0         1.0        99.0         2.5         2.0        99.0         1.5         3.0        99.0    2.17    2.67   99.00    1.17    1.67   99.00         3.3         3.5        99.0         1.7         2.3        99.0        3.80        3.60       99.00         3.0         3.0        99.0         3.5         3.0        99.0
         249           1          31          10           4          99       13.05       12.95       15.30          26          13          12         1.5         2.0         2.0         3.0         4.0         3.0         2.0         2.0         2.0         1.0         1.0         1.5         2.0         3.0         2.5         3.5         3.0         2.0    2.33    3.00    2.50    2.00    2.00    1.83         1.9         2.7         3.4         2.6         1.8         1.4        2.65        3.45        4.00         4.5         3.5         3.5         2.5         2.0         2.5
         250           1          26           7           3           0       19.85       99.00       99.00          26          99          99         1.0        99.0        99.0         2.0        99.0        99.0         1.0        99.0        99.0         1.5        99.0        99.0         3.0        99.0        99.0         2.5        99.0        99.0    2.00   99.00   99.00    1.67   99.00   99.00         2.8        99.0        99.0         2.7        99.0        99.0        3.05       99.00       99.00         3.5        99.0        99.0         3.0        99.0        99.0
         251           2          20           7           3           0       17.60       16.75       17.60           7           9           5         1.0         1.0         1.0         1.5         2.0         2.5         3.0         3.0         3.5         1.5         1.0         1.5         2.0         2.5         2.5         2.0         2.0         2.0    2.17    2.50    2.83    1.50    1.33    1.50         4.2         4.6         4.3         1.0         1.0         1.0        4.60        4.80        4.65         4.0         3.5         3.5         5.0         4.5         4.5
         252           1          26           8           4          99       16.95       99.00       18.50          13          18          16         2.5         1.5         2.0         4.0         3.5         3.5         4.0         4.0         3.5         2.0         1.5         2.0         3.5         3.5         3.0         4.0         3.5         2.5    3.83    3.67    3.33    2.83    2.17    2.17         3.3         3.3         3.3         2.1         2.4         1.9        3.60        3.45        3.70         3.5         3.0         3.5         2.5         4.0         3.0
         253           1          22           8           3           0       14.55       18.85       99.00          27          23          99         2.0         3.0        99.0         1.5         4.0        99.0         1.5         1.5        99.0         2.0         1.0        99.0         2.5         3.0        99.0         2.5         3.5        99.0    1.83    2.83   99.00    2.17    2.50   99.00         2.8         3.7        99.0         2.4         2.3        99.0        3.20        3.70       99.00         3.5         3.0         2.0         2.5         3.5         3.0
         254           1          30          10           4          99       14.10       17.65       18.70          20           9           4         1.0         1.0         1.0         4.0         4.0         4.0         1.0         1.5         1.0         1.0         1.0         1.0         2.5         3.5         3.5         1.5         1.5         1.5    2.50    3.00    2.83    1.17    1.17    1.17         3.2         4.0         4.1         2.1         1.2         1.2        3.55        4.40        4.45         4.0         2.5         3.5         4.5         4.0         4.5
         255           2          30           8           3           0       14.45       13.80       99.00          27          28          99         1.0         1.0        99.0         2.0         2.0        99.0         4.0         3.0        99.0         2.5         3.0        99.0         2.5         1.0        99.0         4.0         4.0        99.0    2.83    2.00   99.00    2.50    2.67   99.00         2.6         1.9        99.0         3.0         3.6        99.0        2.80        2.15       99.00         5.0         4.5        99.0         2.5         2.5        99.0
         256           1          26           8           3           1       20.25       16.90       15.95          14          13          28         1.0         1.0         1.5         3.5         2.5         4.0         1.5         1.5         2.0         1.0         2.0         1.0         2.0         1.5         2.5         2.0         3.0         2.5    2.33    1.83    2.83    1.33    2.00    1.67         3.8         3.0         3.0         1.4         1.8         2.3        4.20        3.60        3.35         4.5         4.5         5.0         5.0         5.0         5.0
         257           2          37           8           5          99       23.05       23.05       99.00          12          14          99         1.5         1.0        99.0         3.0         3.0        99.0         3.0         3.0        99.0         1.0         1.0        99.0         3.0         3.0        99.0         2.5         1.0        99.0    3.00    3.00   99.00    1.67    1.00   99.00         3.6         4.5        99.0         1.1         1.1        99.0        4.25        4.70       99.00         2.5         2.5        99.0         3.0         3.5        99.0
         258           1          23           7           3           0       15.40       99.00       15.35          24          99          21         1.0        99.0         1.0         2.0        99.0         3.0         2.5        99.0         3.0         1.0        99.0         1.0         3.0        99.0         2.5         2.5        99.0         1.5    2.50   99.00    2.83    1.50   99.00    1.17         3.0        99.0         3.2         3.1        99.0         2.5        2.95       99.00        3.35         3.0        99.0         4.5         3.0        99.0         3.0
         259           2          26           8           3           0       21.65       21.45       22.15          11          12          14         1.0         1.5         1.5         2.0         3.0         3.5         3.0         3.0         2.5         1.5         2.0         1.5         2.0         3.0         2.5         1.5         1.5         3.0    2.33    3.00    2.83    1.33    1.67    2.00         3.8         3.7         4.0         1.8         1.6         1.6        4.00        4.05        4.20         2.0         2.0         2.0         4.0         4.0         4.0
         260           2          26           7           3           0       25.95       24.30       24.55          18          16          13         1.0         1.5         1.0         2.0         3.0         3.0         4.0         4.0         4.0         1.0         1.0         1.5         3.0         2.5         4.0         1.5         1.5         2.0    3.00    3.17    3.67    1.17    1.33    1.50         3.6         3.5         3.6         2.1         1.9         2.2        3.75        3.80        3.70         2.0         2.0         2.5         2.0         2.5         2.5
         261           2          30           8           6          99       22.20       99.00       99.00          13          99          99         1.0        99.0        99.0         2.0        99.0        99.0         3.5        99.0        99.0         1.5        99.0        99.0         3.5        99.0        99.0         2.0        99.0        99.0    3.00   99.00   99.00    1.50   99.00   99.00         3.4        99.0        99.0         1.5        99.0        99.0        3.95       99.00       99.00         1.5        99.0        99.0         2.0        99.0        99.0
         262           2          21           7           3           0       22.00       99.00       99.00          15          99          99         1.5        99.0        99.0         3.0        99.0        99.0         2.0        99.0        99.0         1.0        99.0        99.0         3.0        99.0        99.0         2.0        99.0        99.0    2.67   99.00   99.00    1.50   99.00   99.00         4.0        99.0        99.0         2.2        99.0        99.0        3.90       99.00       99.00         3.5        99.0        99.0         4.0        99.0        99.0
         263           1          36           8           7          99       14.80       13.75       99.00          23          22          99         3.0         2.5        99.0         2.0         1.5        99.0         2.5         1.0        99.0         1.5         1.5        99.0         2.0         1.5        99.0         2.5         2.5        99.0    2.17    1.33   99.00    2.33    2.17   99.00         4.5         3.6        99.0         2.2         2.5        99.0        4.15        3.55       99.00         3.5         4.0        99.0         4.5         4.5        99.0
         264           1          27           8           5          99       16.65       99.00       99.00          24          99          99         1.0        99.0        99.0         2.0        99.0        99.0         2.0        99.0        99.0         2.0        99.0        99.0         2.0        99.0        99.0         2.0        99.0        99.0    2.00   99.00   99.00    1.67   99.00   99.00         3.4        99.0        99.0         3.3        99.0        99.0        3.05       99.00       99.00         4.5        99.0        99.0         4.5        99.0        99.0
         265           2          24           7           3           0       15.70       99.00       99.00          32          99          99         3.5        99.0        99.0         4.0        99.0        99.0         2.0        99.0        99.0         1.5        99.0        99.0         3.0        99.0        99.0         2.0        99.0        99.0    3.00   99.00   99.00    2.33   99.00   99.00         2.7        99.0        99.0         2.8        99.0        99.0        2.95       99.00       99.00         4.5        99.0        99.0         2.0        99.0        99.0
         266           1          22           7           3           0       17.05       99.00       99.00          24          99          99         1.5        99.0        99.0         2.0        99.0        99.0         2.0        99.0        99.0         1.0        99.0        99.0         1.5        99.0        99.0         1.5        99.0        99.0    1.83   99.00   99.00    1.33   99.00   99.00         2.1        99.0        99.0         2.5        99.0        99.0        2.80       99.00       99.00         4.0        99.0        99.0         2.5        99.0        99.0
         267           1          24           7           3           0       20.55       99.00       99.00          15          99          99         1.5        99.0        99.0         3.0        99.0        99.0         2.5        99.0        99.0         1.0        99.0        99.0         3.0        99.0        99.0         2.0        99.0        99.0    2.83   99.00   99.00    1.50   99.00   99.00         3.5        99.0        99.0         1.6        99.0        99.0        3.95       99.00       99.00         3.5        99.0        99.0         2.5        99.0        99.0
         268           2          21           7           3           0       17.60       14.90       99.00           8          21          99         1.0         2.5        99.0         2.0         2.5        99.0         3.0         2.0        99.0         1.5         2.0        99.0         3.0         2.5        99.0         3.0         3.5        99.0    2.67    2.33   99.00    1.83    2.67   99.00         3.9         3.1        99.0         2.3         2.8        99.0        3.80        3.15       99.00         2.5         4.0        99.0         4.5         3.0        99.0
         269           1          23          10           4          99       21.30       21.25       21.20          13          15          99         1.5         1.0        99.0         2.0         1.5        99.0         2.5         1.0        99.0         1.0         2.0        99.0         3.0         2.0        99.0         1.0         2.0        99.0    2.50    1.50   99.00    1.17    1.67   99.00         4.5         4.3        99.0         2.1         1.7        99.0        4.20        4.30       99.00         2.5         2.0         2.5         4.0         3.5         3.5
         270           1          30           7           4          99       17.85       19.30       16.70          19          16          14         1.0         1.0         1.0         2.0         2.0         2.0         1.0         2.0         1.5         1.0         1.5         1.5         1.5         2.5         2.0         3.0         3.0         3.0    1.50    2.17    1.83    1.67    1.83    1.83         3.8         4.2         3.9         2.0         1.6         1.5        3.90        4.30        4.20         2.5         3.0         2.0         3.5         3.0         2.5
         271           1          23           6           2          99       12.20       12.70       99.00          25          29          99         2.0         1.0        99.0         2.0         2.0        99.0         2.5         2.0        99.0         1.0         1.0        99.0         3.0         2.5        99.0         3.5         2.5        99.0    2.50    2.17   99.00    2.17    1.50   99.00         3.4         3.1        99.0         2.5         3.8        99.0        3.45        2.65       99.00         4.0         5.0        99.0         3.0         3.0        99.0
         272           1          28           8           3           1       28.00       25.35       27.30           5          10           8         1.5         1.0         1.0         4.0         4.0         4.0         4.0         3.0         3.0         1.5         1.0         1.0         4.0         2.5         4.0         1.0         1.5         1.0    4.00    3.17    3.67    1.33    1.17    1.00         4.4         3.5         3.8         1.2         1.0         1.3        4.60        4.25        4.25         2.0         2.0         2.0         4.5         4.5         4.0
         273           1          25           7           3           0       17.55       17.35       14.15          15          19          20         1.0         1.5         2.0         2.5         2.5         2.5         3.0         3.0         2.5         1.5         2.0         1.5         3.0         3.0         2.5         2.0         2.5         2.0    2.83    2.83    2.50    1.50    2.00    1.83         2.6         1.7         2.3         1.3         1.4         1.4        3.65        3.15        3.45         4.0         4.0         4.0         3.0         2.5         3.0
         274           2          25           7           3           0       16.20       99.00       99.00          14          99          99         1.5        99.0        99.0         2.0        99.0        99.0         3.0        99.0        99.0         1.0        99.0        99.0         1.5        99.0        99.0         3.0        99.0        99.0    2.17   99.00   99.00    1.83   99.00   99.00         3.3        99.0        99.0         2.3        99.0        99.0        3.50       99.00       99.00         2.0         2.0        99.0         3.0         3.0        99.0
         275           1          31           8           4          99       19.75       99.00       99.00          17          99          99         1.0        99.0        99.0         2.5        99.0        99.0         3.0        99.0        99.0         1.5        99.0        99.0         3.5        99.0        99.0         2.5        99.0        99.0    3.00   99.00   99.00    1.67   99.00   99.00         3.3        99.0        99.0         2.0        99.0        99.0        3.65       99.00       99.00         2.5        99.0        99.0         2.5        99.0        99.0
         276           1          21           7           4          99       20.40       99.00       99.00          20          99          99         1.5        99.0        99.0         3.5        99.0        99.0         1.0        99.0        99.0         1.0        99.0        99.0         3.5        99.0        99.0         2.0        99.0        99.0    2.67   99.00   99.00    1.50   99.00   99.00         3.2        99.0        99.0         2.0        99.0        99.0        3.60       99.00       99.00         4.0        99.0        99.0         2.5        99.0        99.0
         277           1          34           7           7          99       13.90       99.00       99.00          31          99          99         2.0        99.0        99.0         2.0        99.0        99.0         1.5        99.0        99.0         1.5        99.0        99.0         1.5        99.0        99.0         2.5        99.0        99.0    1.67   99.00   99.00    2.00   99.00   99.00         2.2        99.0        99.0         4.1        99.0        99.0        2.05       99.00       99.00         5.0        99.0        99.0         3.5        99.0        99.0
         278           3          37           7           4          99       24.05       21.75       99.00          14          13          99         1.0         1.0        99.0         3.0         3.0        99.0         4.0         4.0        99.0         1.5         1.5        99.0         4.0         3.0        99.0         2.0         2.5        99.0    3.67    3.33   99.00    1.50    1.67   99.00         3.4         3.2        99.0         1.7         1.6        99.0        3.85        3.80       99.00         2.0         1.5        99.0         4.0         4.0        99.0
         279           1          22           7           3           0       18.20       19.65       99.00          15          11          99         2.0         1.0        99.0         2.0         1.5        99.0         3.0         2.0        99.0         1.5         1.5        99.0         3.0         3.0        99.0         1.5         1.0        99.0    2.67    2.17   99.00    1.67    1.17   99.00         3.6        99.0        99.0         2.9        99.0        99.0        3.35       99.00       99.00         3.0         3.0        99.0         4.5         4.5        99.0
         280           1          21           7           3           0       23.00       21.40       20.75          24          28          22         1.0         1.0         1.0         1.5         2.5         2.0         3.5         2.5         2.0         2.0         2.5         2.5         2.0         1.5         2.0         1.5         2.5         2.5    2.33    2.17    2.00    1.50    2.00    2.00         3.6         3.3         3.5         2.4         3.4         3.1        3.60        2.95        3.20         2.5         3.0         3.0         1.5         1.5         1.5
         281           2          28           8           4          99       19.80       99.00       99.00          18          99          99         1.5        99.0        99.0         3.5        99.0        99.0         2.5        99.0        99.0         1.0        99.0        99.0         2.5        99.0        99.0         2.0        99.0        99.0    2.83   99.00   99.00    1.50   99.00   99.00         3.6        99.0        99.0         1.6        99.0        99.0        4.00       99.00       99.00         2.5        99.0        99.0         3.0        99.0        99.0
         282           2          64           8           9           0       20.55       23.30       21.40          12          12          15         1.5         1.5         2.0         3.5         3.0         3.0         4.0         3.0         3.0         1.0         1.0         1.0         2.5         2.5         2.5         3.0         2.0         2.5    3.33    2.83    2.83    1.83    1.50    1.83         3.5         2.6         3.2         3.0         2.3         2.4        3.25        3.15        3.40         2.5         2.0         3.0         4.5         4.0         3.0
         283           1          48           8           5          99       22.50       23.75       25.10          14          11          10         1.0         1.5         1.0         4.0         4.0         4.0         2.0         2.0         2.0         1.0         1.0         1.0         4.0         4.0         4.0         2.0         2.5         1.5    3.33    3.33    3.33    1.33    1.67    1.17         4.3         4.6         4.7         1.2         1.2         1.2        4.55        4.70        4.75         2.0         2.0         2.0         5.0         5.0         5.0
         284           2          34           8           5          99       12.35       99.00       12.15          28          99          24         2.0        99.0         1.0         1.0        99.0         1.0         3.5        99.0         2.5         4.0        99.0         2.5         1.0        99.0         1.0         4.0        99.0         4.0    1.83   99.00    1.50    3.33   99.00    2.50         1.9        99.0         2.3         2.8        99.0         3.6        2.55       99.00        2.35         4.0        99.0         1.5         2.5        99.0         2.5
         285           2          36           8           6          99       18.80       99.00       99.00          19          99          99         1.0        99.0        99.0         3.0        99.0        99.0         3.0        99.0        99.0         1.5        99.0        99.0         3.0        99.0        99.0         2.5        99.0        99.0    3.00   99.00   99.00    1.67   99.00   99.00         3.1        99.0        99.0         1.9        99.0        99.0        3.60       99.00       99.00         3.0        99.0        99.0         3.5        99.0        99.0
         286           1          21           7           2          99       12.55       99.00       99.00          24          99          99         1.0        99.0        99.0         2.5        99.0        99.0         2.0        99.0        99.0         1.0        99.0        99.0         2.0        99.0        99.0         4.0        99.0        99.0    2.17   99.00   99.00    2.00   99.00   99.00         3.3        99.0        99.0         3.3        99.0        99.0        3.00       99.00       99.00         4.0        99.0        99.0         4.5        99.0        99.0
         287           2          20           7           3           0       18.50       17.30       99.00          14          20          99         1.5         1.5        99.0         3.0         3.0        99.0         2.5         2.5        99.0         1.5         2.0        99.0         2.5         3.0        99.0         2.0         3.5        99.0    2.67    2.83   99.00    1.67    2.33   99.00         3.5         3.4        99.0         2.0         2.7        99.0        3.75        3.35       99.00         3.0         2.0        99.0         1.0         1.5        99.0
         288           1          20           7           3           0       19.70       20.65       17.20          27          10          29         1.5         1.5         1.0         3.5         3.5         2.5         2.5         2.5         2.0         1.0         1.0         1.0         3.5         2.5         2.0         1.5         3.0         4.0    3.17    2.83    2.17    1.33    1.83    2.00         4.2         4.2         2.5         1.7         1.6         4.1        4.25        4.30        2.20         3.5         3.5         5.0         3.5         3.5         2.5
         289           2          23           8           3           0       12.60       13.15       14.40          29          27          15         1.0         2.0         1.0         2.5         2.0         2.0         1.0         2.0         2.0         1.0         1.0         1.0         1.0         2.0         1.0         2.0         2.0         2.0    1.50    2.00    1.67    1.33    1.67    1.33         1.9         2.6         2.1         2.7         3.0         2.8        2.60        2.80        2.65         5.0         4.5         4.5         2.5         2.5         2.5
         290           1          21           7           2          99       21.50       99.00       99.00          19          99          99         2.0        99.0        99.0         2.5        99.0        99.0         2.0        99.0        99.0         2.0        99.0        99.0         2.5        99.0        99.0         2.5        99.0        99.0    2.33   99.00   99.00    2.17   99.00   99.00         3.7        99.0        99.0         2.2        99.0        99.0        3.75       99.00       99.00         2.0        99.0        99.0         4.0        99.0        99.0
         291           1          21           7           3           0       17.90       99.00       99.00          24          99          99         3.0        99.0        99.0         3.5        99.0        99.0         4.0        99.0        99.0         2.0        99.0        99.0         3.0        99.0        99.0         2.5        99.0        99.0    3.50   99.00   99.00    2.50   99.00   99.00         2.4        99.0        99.0         1.9        99.0        99.0        3.25       99.00       99.00         3.5         3.0        99.0         3.0         2.5        99.0
         292           1          23          10           3           0       19.70       20.85       99.00          14          99          99         2.0        99.0        99.0         2.5        99.0        99.0         3.0        99.0        99.0         1.0        99.0        99.0         3.0        99.0        99.0         2.0        99.0        99.0    2.83   99.00   99.00    1.67   99.00   99.00         4.3        99.0        99.0         2.0        99.0        99.0        4.15       99.00       99.00         3.0         2.0        99.0         4.5         4.5        99.0
         293           1          24           8           3           0       16.60       16.95       15.90          21          18          12         1.0         1.0         1.0         2.5         1.5         1.5         3.0         3.0         1.0         1.0         1.0         1.0         2.0         2.0         2.5         4.0         1.5         2.5    2.50    2.17    1.67    2.00    1.17    1.50         3.3         1.9         2.5         2.1         1.8         1.8        3.60        3.05        3.35         3.5         4.5         4.0         3.0         4.0         5.0
         294           1          19           7           3           0       16.05       18.00       18.80          23          20          18         1.5         3.0         1.0         2.5         3.0         2.0         3.0         2.5         2.0         2.5         3.0         2.5         4.0         3.0         2.0         2.5         3.0         3.5    3.17    2.83    2.00    2.17    3.00    2.33         3.3         3.4        99.0         2.8         3.2        99.0        3.25        3.10       99.00         3.0         3.0         3.5         4.0         3.0         3.0
         295           1          31           7           3           0       16.10       99.00       99.00          27          99          99         1.5        99.0        99.0         3.0        99.0        99.0         1.5        99.0        99.0         1.0        99.0        99.0         1.5        99.0        99.0         1.5        99.0        99.0    2.00   99.00   99.00    1.33   99.00   99.00         2.2        99.0        99.0         3.7        99.0        99.0        2.25       99.00       99.00         4.5         5.0        99.0         3.0         3.0        99.0
         296           1          21           7           3           0       13.20       17.90       16.30          28          24          14         1.5         1.0         1.5         4.0         4.0         4.0         2.0         3.0         2.0         1.0         1.5         1.5         4.0         2.5         3.5         2.5         3.0         2.5    3.33    3.17    3.17    1.67    1.83    1.83         3.9         4.3         4.3         2.1         1.9         1.5        3.90        4.20        4.40         5.0         4.5         4.0         4.0         4.0         5.0
         297           2          22           7           3           0       15.30       15.00       99.00          26          26          99         2.5         1.5        99.0         3.0         2.0        99.0         3.0         2.0        99.0         2.5         1.0        99.0         3.5         2.0        99.0         3.5         4.0        99.0    3.17    2.00   99.00    2.83    2.17   99.00         3.9         4.1        99.0         3.4         4.0        99.0        3.25        3.05       99.00         3.5         3.5        99.0         1.5         2.0        99.0
         298           1          22           7           3           0       16.55       19.60       17.35          26          22          23         1.0         1.5         1.5         2.5         2.5         2.0         3.0         3.0         3.0         1.5         1.5         1.0         2.5         3.5         2.0         3.5         3.5         3.0    2.67    3.00    2.33    2.00    2.17    1.83         3.2         3.3         3.5         2.9         2.7         2.4        3.15        3.30        3.55         4.5         4.5         4.5         3.5         4.0         3.5
         299           1          21           8           3           0       17.35       99.00       99.00          25          99          99        99.0        99.0        99.0        99.0        99.0        99.0        99.0        99.0        99.0        99.0        99.0        99.0        99.0        99.0        99.0        99.0        99.0        99.0   99.00   99.00   99.00   99.00   99.00   99.00        99.0        99.0        99.0        99.0        99.0        99.0       99.00       99.00       99.00         3.5        99.0        99.0         4.0        99.0        99.0
         300           1          22           7           3           0       12.95       99.00       14.00          22          99          23         1.0        99.0         2.0         2.0        99.0         3.0         2.5        99.0         1.0         2.0        99.0         1.0         1.5        99.0         2.0         3.0        99.0         2.5    2.00   99.00    2.00    2.00   99.00    1.83         2.2        99.0         2.9         2.5        99.0         2.3        2.85       99.00        3.30         4.0        99.0         4.0         3.5        99.0         3.0
         301           1          22           7           3           0       20.05       17.90       18.40          19          24          17         1.0         2.5         3.0         3.5         2.5         2.0         4.0         3.5         3.0         1.0         1.0         1.5         2.5         4.0         3.5         3.0         3.0         3.0    3.33    3.33    2.83    1.67    2.17    2.50         3.4         3.1         3.2         1.9         2.6         2.5        3.75        3.25        3.35         3.5         3.5         3.0         1.5         2.0         3.5
         302           1          31           8           3           0       19.65       18.35       20.60          19          13          16         1.0         1.0         1.0         3.5         1.5         2.0         3.5         2.5         2.5         1.5         2.0         1.0         2.5         3.0         3.0         2.0         1.5         1.5    3.17    2.33    2.50    1.50    1.50    1.17         3.6         3.9         4.0         1.6         1.4         1.4        4.00        4.25        4.30         4.5         4.0         4.0         4.0         3.5         3.5
         303           2          20           7           3           0       24.10       99.00       99.00           7          99          99         1.0        99.0        99.0         1.5        99.0        99.0         4.0        99.0        99.0         3.0        99.0        99.0         2.5        99.0        99.0         2.0        99.0        99.0    2.67   99.00   99.00    2.00   99.00   99.00         4.1        99.0        99.0         1.7        99.0        99.0        4.20       99.00       99.00         1.5        99.0        99.0         3.0        99.0        99.0
         304           1          23           7           3           0       11.20       99.00       99.00          28          99          99         1.0        99.0        99.0         2.0        99.0        99.0         2.0        99.0        99.0         1.5        99.0        99.0         1.0        99.0        99.0         4.0        99.0        99.0    1.67   99.00   99.00    2.17   99.00   99.00         2.4        99.0        99.0         3.4        99.0        99.0        2.50       99.00       99.00         5.0        99.0        99.0         3.0        99.0        99.0
         305           1          27           8           3           0       25.55       99.00       27.65           9          99           7         1.0        99.0         1.0         3.0        99.0         3.0         3.0        99.0         2.5         1.5        99.0         1.5         4.0        99.0         3.5         2.0        99.0         1.5    3.33   99.00    3.00    1.50   99.00    1.33         4.5        99.0         4.1         1.7        99.0         1.4        4.40       99.00        4.35         1.5        99.0         1.5         3.5        99.0         3.5
         306           1          20           7           3           0       20.25       19.90       99.00          20          15          99         1.5        99.0        99.0         3.5        99.0        99.0         2.0        99.0        99.0         2.0        99.0        99.0         1.0        99.0        99.0         1.0        99.0        99.0    2.17   99.00   99.00    1.50   99.00   99.00         2.9        99.0        99.0         1.5        99.0        99.0        3.70       99.00       99.00         4.0         4.0         4.0         3.0         3.5         3.5
         307           1          24           8           3           0       18.00       17.95       99.00          23          19          99         1.0         1.0        99.0         3.0         3.0        99.0         3.5         3.0        99.0         1.0         1.5        99.0         2.0         3.0        99.0         3.5         2.5        99.0    2.83    3.00   99.00    1.83    1.67   99.00         3.7         3.9        99.0         1.9         1.4        99.0        3.90        4.25       99.00         3.0         3.5         3.5         4.0         3.5         4.0
         308           1          20           7           3           0       22.60       24.35       25.05           5          12           5         1.5         1.0         1.0         2.5         3.0         3.5         2.5         2.5         2.5         1.0         1.0         1.0         3.5         2.5         3.0         2.0         1.5         1.0    2.83    2.67    3.00    1.50    1.17    1.00         3.9         3.5         4.0         1.9         1.6         1.4        4.00        3.95        4.30         2.0         1.0         1.0         3.5         4.0         3.0
         309           1          24           7           3           0       16.70       99.00       99.00          25          99          99         1.5        99.0        99.0         2.0        99.0        99.0         3.0        99.0        99.0         2.0        99.0        99.0         2.0        99.0        99.0         3.5        99.0        99.0    2.33   99.00   99.00    2.33   99.00   99.00         3.7        99.0        99.0         1.8        99.0        99.0        3.95       99.00       99.00         2.5        99.0        99.0         4.0        99.0        99.0
         310           1          22           7           3           0       18.45       21.05       22.75          18           6           7         2.5         2.0         1.0         3.5         3.0         2.5         3.0         2.5         4.0         1.0         1.5         1.5         2.0         1.5         3.0         2.0         1.0         1.0    2.83    2.33    3.17    1.83    1.50    1.17         3.1         3.9         4.0         1.4         1.4         1.3        3.85        4.25        4.35         3.5         3.0         3.5         3.5         4.0         4.0
         311           1          20           7           3           0       17.80       16.45       99.00          14          19          99         1.5         1.0        99.0         2.5         2.5        99.0         3.0         2.0        99.0         1.0         1.5        99.0         1.5         2.5        99.0         2.5         2.5        99.0    2.33    2.33   99.00    1.67    1.67   99.00         3.5         3.5        99.0         2.6         2.0        99.0        3.45        3.75       99.00         2.5         3.0        99.0         2.5         3.0        99.0
         312           2          32           7           3           0       11.40       22.85       25.65          29          19          10         2.0         1.0         1.0         2.5         3.0         4.0         2.5         3.0         1.5         3.0         1.5         1.0         1.0         3.5         3.0         3.0         3.0         2.0    2.00    3.17    2.83    2.67    1.83    1.33         3.7         3.8         3.9         3.0         2.6         1.8        3.35        3.60        4.05         4.0         2.0         2.0         2.5         3.5         4.0
         313           1          21           7           3           0       21.05       99.00       99.00           6          99          99         1.0        99.0        99.0         3.0        99.0        99.0         3.5        99.0        99.0         1.5        99.0        99.0         1.5        99.0        99.0         1.0        99.0        99.0    2.67   99.00   99.00    1.17   99.00   99.00         3.3        99.0        99.0         1.3        99.0        99.0        4.00       99.00       99.00         2.0        99.0        99.0         3.0        99.0        99.0
         314           2          31           7           3           0       24.60       99.00       99.00          11          99          99         1.0        99.0        99.0         3.0        99.0        99.0         4.0        99.0        99.0         1.5        99.0        99.0         3.0        99.0        99.0         2.0        99.0        99.0    3.33   99.00   99.00    1.50   99.00   99.00         3.9        99.0        99.0         1.9        99.0        99.0        4.00       99.00       99.00         2.0        99.0        99.0         5.0        99.0        99.0
         315           2          24           6           3           0       24.90       99.00       20.95          21          99          14         1.0        99.0         1.0         3.0        99.0         1.5         1.0        99.0         1.0         1.0        99.0         1.0         4.0        99.0         3.5         3.0        99.0         2.0    2.67   99.00    2.00    1.67   99.00    1.33         4.3        99.0         3.5         2.0        99.0         1.2        4.15       99.00        4.15         1.0        99.0         1.0         1.5        99.0         1.5
         316           2          21           7           3           0       19.45       20.20       21.00          19           8           7         1.0         1.0         1.0         2.0         1.0         2.5         4.0         4.0         4.0         3.0         3.5         3.0         3.0         4.0         2.5         1.0         2.0         2.0    3.00    3.00    3.00    1.67    2.17    2.00         4.0         3.8         3.6         1.8         1.9         1.7        4.10        3.95        3.95         2.0         2.0         1.5         3.5         3.0         3.0
         317           1          21           8           3           0       19.65       18.80       99.00          21          22          99         3.5         2.0        99.0         2.0         1.5        99.0         3.0         3.5        99.0         1.5         2.5        99.0         2.5         3.5        99.0         1.0         2.5        99.0    2.50    2.83   99.00    2.00    2.33   99.00         4.2         3.6        99.0         2.1         3.7        99.0        4.05        2.95       99.00         2.0         2.0        99.0         3.5         3.5        99.0
         318           1          22           7           3           0       23.45       23.55       24.25          17          11          14         1.0         2.0         1.5         3.0         3.0         3.0         4.0         3.0         3.5         1.5         1.5         1.5         4.0         3.0         3.5         2.0         1.5         2.0    3.67    3.00    3.33    1.50    1.67    1.67         3.7         4.3         4.3         1.8         1.7         1.7        3.95        4.30        4.30         2.5         2.5         2.5         4.0         3.5         4.0
         319           2          33           8           6          99       19.50       18.25       18.00          23          18          20         2.5         2.0         2.5         3.5         3.0         2.0         2.0         2.5         2.0         1.0         2.5         2.0         3.5         3.0         2.0         1.5         2.5         2.0    3.00    2.83    2.00    1.67    2.33    2.17         4.0         2.8         2.2         2.7         2.1         2.2        3.65        3.35        3.00         3.0         3.0         3.0         3.5         3.0         3.0
         320           2          19           7           3           0       14.70       13.35       11.35          24          29          31         1.0         1.5         1.5         3.5         2.0         2.5         1.5         1.5         1.0         1.0         1.0         1.0         1.5         2.0         1.5         4.0         4.0         4.0    2.17    1.83    1.67    2.00    2.17    2.17         3.1         3.1         2.2         2.4         2.7         2.4        3.35        3.20        2.90         3.0         3.5         3.0         4.0         4.0         4.0
         321           1          29           8           4          99       25.50       99.00       99.00          12          99          99         1.0        99.0        99.0         4.0        99.0        99.0         3.0        99.0        99.0         1.5        99.0        99.0         3.0        99.0        99.0         2.0        99.0        99.0    3.33   99.00   99.00    1.50   99.00   99.00        99.0        99.0        99.0         1.0        99.0        99.0       99.00       99.00       99.00         2.0        99.0        99.0         4.0        99.0        99.0
         322           1          19           7           3           0       14.20       99.00       99.00          14          99          99         1.0        99.0        99.0         2.5        99.0        99.0         3.5        99.0        99.0         1.0        99.0        99.0         2.5        99.0        99.0         3.5        99.0        99.0    2.83   99.00   99.00    1.83   99.00   99.00         3.5        99.0        99.0         1.6        99.0        99.0        3.95       99.00       99.00         4.0         4.0        99.0         4.0         4.0        99.0
         323           2          20           7           3           0       14.70       11.85       13.35          22           8          13         3.0         1.0         1.5         2.5         3.5         2.5         1.5         2.5         2.5         1.0         1.0         1.0         3.0         3.0         2.5         3.5         1.5         2.0    2.33    3.00    2.50    2.50    1.17    1.50         3.2         4.1         3.4         2.9         1.4         1.6        3.15        4.35        3.90         3.5         4.0         4.0         2.5         3.5         3.0
         324           1          22           7           3           0       15.65       14.20       99.00          20          25          99         2.0         1.0        99.0         2.5         2.5        99.0         2.0         2.5        99.0         1.5         1.0        99.0         2.5         2.5        99.0         2.5         1.0        99.0    2.33    2.50   99.00    2.00    1.00   99.00         3.1         2.9        99.0         2.3         2.0        99.0        3.40        3.45       99.00         4.0         4.0        99.0         4.0         4.5        99.0
         325           1          81           7           3           0       16.05       17.20       99.00          30          14          99         1.5         1.0        99.0         2.5         4.0        99.0         2.5         3.5        99.0         1.0         2.0        99.0         1.0         1.5        99.0         1.5         2.5        99.0    2.00    3.00   99.00    1.33    1.83   99.00         3.3         4.0        99.0         1.6         1.6        99.0        3.85        4.20       99.00         3.5         3.0        99.0         2.5         2.5        99.0
         326           1          21           7           3           0       11.65       15.35       15.40          26          20          16         1.0         1.0         1.0         1.0         2.0         2.0         2.0         2.0         2.0         2.0         1.0         2.5         1.5         1.0         2.0         3.0         2.0         1.0    1.50    1.67    2.00    2.00    1.33    1.50         1.4         2.1         2.2         1.9         1.8         2.2        2.75        3.15        3.00         4.5         4.0         3.5         2.0         2.0         2.0
         327           1          23           7           3           0       17.65       99.00       99.00          20          99          99         2.5        99.0        99.0         2.0        99.0        99.0         1.5        99.0        99.0         1.0        99.0        99.0         2.5        99.0        99.0         2.0        99.0        99.0    2.00   99.00   99.00    1.83   99.00   99.00         2.3        99.0        99.0         1.9        99.0        99.0        3.20       99.00       99.00         3.0        99.0        99.0         3.5        99.0        99.0
         328           1          28           8           3           0       15.15       15.15       99.00          14          16          99        99.0        99.0        99.0        99.0        99.0        99.0        99.0        99.0        99.0        99.0        99.0        99.0        99.0        99.0        99.0        99.0        99.0        99.0   99.00   99.00   99.00   99.00   99.00   99.00        99.0        99.0        99.0        99.0        99.0        99.0       99.00       99.00       99.00         4.5         3.0        99.0         2.0         3.0        99.0
         329           2          22           7           3           0       27.75       28.35       99.00           5           6          99         1.0         1.0        99.0         3.5         4.0        99.0         4.0         2.5        99.0         1.0         1.0        99.0         4.0         4.0        99.0         1.0         1.5        99.0    3.83    3.50   99.00    1.00    1.17   99.00         4.4         4.1        99.0         1.1         1.2        99.0        4.65        4.45       99.00         1.5         1.5        99.0         4.5         4.0        99.0
         330           1          38          10           3           0       19.80       22.30       99.00          21          16          99         1.5         1.5        99.0         4.0         4.0        99.0         3.0         4.0        99.0         1.0         2.5        99.0         3.0         4.0        99.0         1.0         1.0        99.0    3.33    4.00   99.00    1.17    1.67   99.00         3.9         4.1        99.0         1.7         1.4        99.0        4.10        4.35       99.00         3.5         3.5        99.0         5.0         4.5        99.0
         331           1          33           8           4          99       13.20       14.75       14.40          25          24          99         1.0         3.5        99.0         2.5         3.5        99.0         1.5         1.5        99.0         1.5         2.0        99.0         1.0         1.0        99.0         2.5         2.5        99.0    1.67    2.00   99.00    1.67    2.67   99.00         2.0         1.9        99.0         3.8         3.9        99.0        2.10        2.00       99.00         3.5         3.0         3.0         4.5         5.0         5.0
         332           1          25           7           3           0       16.30       18.75       18.35          25          22          18         1.0         1.0         1.5         3.0         3.0         3.0         2.5         2.5         3.0         1.5         1.0         1.0         2.5         2.5         1.5         4.0         3.0         3.5    2.67    2.67    2.50    2.17    1.67    2.00         3.6         4.0         3.7         2.5         3.4         2.7        3.55        3.30        3.50         3.5         3.5         3.5         3.0         3.5         3.0
         333           1          22           7           3           0       15.60       16.70       16.70          25          24          21         2.0         1.5         1.5         2.0         2.0         3.5         1.0         2.5         2.0         1.0         2.0         1.0         1.5         2.0         1.0         2.0         1.0         1.0    1.50    2.17    2.17    1.67    1.50    1.17         3.5         3.2         3.8         2.0         2.2         2.7        3.75        3.50        3.55         2.0         3.0         2.0         3.5         4.0         4.0
         334           1          32           8           4          99       19.45       99.00       20.40          15          99          10         1.0        99.0         1.0         4.0        99.0         4.0         2.0        99.0         2.5         1.5        99.0         1.5         1.5        99.0         2.5         2.0        99.0         2.0    2.50   99.00    3.00    1.50   99.00    1.50         3.8        99.0         3.7         2.5        99.0         1.5        3.65       99.00        4.10         3.5        99.0         3.5         3.0        99.0         3.0
         335           2          42           8           6          99       19.00       18.35       19.35          23          22          24         1.0         1.5         1.0         2.5         2.0         2.0         2.0         1.5         4.0         1.5         1.5         3.5         2.0         2.0         1.5         2.5         2.0         2.0    2.17    1.83    2.50    1.67    1.67    2.17         2.7         2.3         2.4         2.6         3.0         2.5        3.05        2.65        2.95         4.5         3.5         3.5         4.0         3.5         3.5
         336           1          29           8           5          99       20.20       24.75       99.00          20          17          99         1.0         1.0        99.0         2.5         3.0        99.0         2.0         2.0        99.0         1.0         1.0        99.0         3.0         4.0        99.0         2.0         1.0        99.0    2.50    3.00   99.00    1.33    1.00   99.00         3.3         3.4        99.0         1.4         1.5        99.0        3.95        3.95       99.00         3.5         3.5        99.0         4.5         4.0        99.0
         337           2          29           7           3           0       17.25       15.80       14.85          14          19          21         2.0         1.0         2.0         1.5         1.5         1.5         3.0         3.0         3.0         3.0         3.0         3.0         2.0         2.0         1.5         4.0         3.5         4.0    2.17    2.17    2.00    3.00    2.50    3.00         2.5         2.8         2.0         2.9         2.8         3.4        2.80        3.00        2.30         2.5         3.0         3.0         3.0         2.0         2.5
         338           1          20           7           3           0       19.10       19.00       99.00          25          21          99         1.0         1.0        99.0         2.0         1.5        99.0         1.0         1.0        99.0         1.5         1.5        99.0         2.0         3.5        99.0         3.5         3.0        99.0    1.67    2.00   99.00    2.00    1.83   99.00         2.3         1.9        99.0         2.3         2.5        99.0        3.00        2.70       99.00         3.5         3.0        99.0         3.5         3.5        99.0
         339           1          20           7           3           0       18.35       18.45       99.00          16          15          99         1.5         1.5        99.0         3.5         3.0        99.0         3.5         3.0        99.0         1.0         1.5        99.0         4.0         3.0        99.0         2.5         2.0        99.0    3.67    3.00   99.00    1.67    1.67   99.00         4.0         3.6        99.0         2.1         1.8        99.0        3.95        3.90       99.00         4.0         4.5        99.0         3.0         4.0        99.0
         340           1          38          10           4          99       17.70       16.70       99.00          14          99          99         1.0        99.0        99.0         4.0        99.0        99.0         2.0        99.0        99.0         1.0        99.0        99.0         2.0        99.0        99.0         1.5        99.0        99.0    2.67   99.00   99.00    1.17   99.00   99.00         3.8        99.0        99.0         2.4        99.0        99.0        3.70       99.00       99.00         4.5         4.5        99.0         4.0         3.0        99.0
         341           1          21           7           3           0       16.50       13.20       12.05          30          29          34         1.5         2.0         3.5         2.0         2.0         2.0         2.0         2.5         1.5         1.0         1.5         2.0         2.5         1.5         2.0         2.0         3.0         3.0    2.17    2.00    1.83    1.50    2.17    2.83         2.0         2.3         2.6         2.7         3.8         3.5        2.65        2.25        2.55         4.5         4.5         4.5         3.0         3.0         3.0
         342           1          22           7           3           0       21.20       99.00       99.00          14          99          99         1.0        99.0        99.0         4.0        99.0        99.0         4.0        99.0        99.0         1.0        99.0        99.0         3.5        99.0        99.0         1.5        99.0        99.0    3.83   99.00   99.00    1.17   99.00   99.00         3.8        99.0        99.0         1.7        99.0        99.0        4.05       99.00       99.00         3.0        99.0        99.0         3.0        99.0        99.0
         343           2          36           7           3           0       18.65       19.15       19.65          20          16          13         1.0         1.0         1.0         3.0         3.0         3.0         1.0         1.5         1.0         1.0         1.0         1.0         2.0         2.0         2.5         2.0         2.0         2.0    2.00    2.17    2.17    1.33    1.33    1.33         3.4         3.7         4.0         2.1         2.2         2.0        3.65        3.75        4.00         2.0         2.0         2.0         4.0         4.0         3.5
         344           1          21           7           3           0       24.15       99.00       21.95          13          99          15         1.0        99.0         1.0         3.0        99.0         2.5         4.0        99.0         2.5         2.5        99.0         1.5         4.0        99.0         3.0         2.0        99.0         2.0    3.67   99.00    2.67    1.83   99.00    1.50         3.9        99.0         3.7         1.7        99.0         1.8        4.10       99.00        3.95         1.5         3.0         1.5         3.0         3.0         3.0
         345           1          28           7           3           1       18.90       19.50       20.95          27          15          12         1.0         1.5         1.0         2.5         3.5         3.0         2.0         3.0         3.0         1.5         1.5         1.5         2.0         2.0         2.5         2.5         2.0         1.0    2.17    2.83    2.83    1.67    1.67    1.17         2.6         3.1         3.1         2.3         2.2         1.6        3.15        3.45        3.75         3.5         3.0         3.5         2.5         2.5         2.5
         346           2          25           7           3           0       12.45       15.60       99.00          21          17          99         1.0         1.0        99.0         2.0         3.0        99.0         2.0         1.5        99.0         1.5         1.5        99.0         2.0         2.5        99.0         3.0         3.0        99.0    2.00    2.33   99.00    1.83    1.83   99.00         3.1         3.0        99.0         2.2         2.2        99.0        3.45        3.40       99.00         2.5         4.0        99.0         5.0         4.0        99.0
         347           2          20           7           3           0       18.35       17.20       99.00          22          25          99         3.0         2.0        99.0         2.5         2.5        99.0         1.5         1.5        99.0         1.5         1.5        99.0         2.5         2.5        99.0         3.0         2.0        99.0    2.17    2.17   99.00    2.50    1.83   99.00         3.5         3.6        99.0         1.6         2.5        99.0        3.95        3.55       99.00         2.0         2.5         3.5         2.0         2.5         3.5
         348           2          29           8           4          99       12.70       10.50       10.70          23          27          27         1.5         1.5         1.0         4.0         4.0         4.0         2.5         2.5         3.0         2.5         1.0         1.5         2.0         2.0         1.0         2.5         4.0         4.0    2.83    2.83    2.67    2.17    2.17    2.17         3.2         3.0         3.4         2.2         2.0         2.9        3.50        3.50        3.25         4.0         4.0         4.0         4.5         4.0         3.5
         349           2          46          10           4          99       22.95       19.40       99.00          13          10          99         1.0         1.0        99.0         4.0         3.0        99.0         3.0         3.5        99.0         1.0         1.0        99.0         2.5         2.0        99.0         2.0         1.0        99.0    3.17    2.83   99.00    1.33    1.00   99.00         4.2         3.7        99.0         1.5         2.2        99.0        4.35        3.75       99.00         2.0         3.0        99.0         4.0         3.5        99.0
         350           1          38           8           3           0       15.25       99.00       99.00          25          99          99         1.5        99.0        99.0         3.0        99.0        99.0         3.0        99.0        99.0         1.5        99.0        99.0         3.0        99.0        99.0         3.5        99.0        99.0    3.00   99.00   99.00    2.17   99.00   99.00         4.3        99.0        99.0         2.4        99.0        99.0        3.95       99.00       99.00         2.0        99.0        99.0         3.5        99.0        99.0
         351           1          24           8           3           0       12.00       11.80       12.25          25          22          26         2.0         1.0         1.0         2.5         2.0         2.0         2.5         2.0         2.5         1.5         1.5         2.0         1.0         2.0         1.5         2.5         3.0         3.0    2.00    2.00    2.00    2.00    1.83    2.00         2.9         3.0         2.7         3.1         2.3         3.1        2.90        3.35        2.80         4.5         4.0         3.0         2.5         2.5         3.0
         352           1          19           7           3           0       18.35       18.05       17.50          21          25          17         2.0         2.0         1.0         2.5         2.5         1.5         3.0         2.5         3.0         1.5         1.5         1.5         2.0         2.0         3.0         1.0         2.0         2.0    2.50    2.33    2.50    1.50    1.83    1.50         3.7         2.5         2.9         1.4         1.3         1.0        4.15        3.60        3.95         3.0         3.0         4.0         3.5         3.0         3.0
         353           1          23           7           3           0       15.20       15.05       14.75          24          18          20         1.5         1.5         1.0         1.5         3.0         3.0         2.0         2.5         2.5         1.5         2.0         1.5         3.0         3.0         3.0         3.0         3.0         2.0    2.17    2.83    2.83    2.00    2.17    1.50         3.0         2.8         3.2         2.1         1.6         1.6        3.45        3.60        3.80         4.0         3.5         4.0         2.5         2.5         2.5
         354           1          23           7           3           0       19.40       15.10       18.00          19          23           9         2.5         1.0         3.0         3.5         4.0         3.0         1.5         2.0         2.0         1.0         1.0         1.0         3.0         3.0         3.5         2.0         2.0         2.0    2.67    3.00    2.83    1.83    1.33    2.00         5.0         4.8         4.7         2.7         2.4         2.1        4.15        4.20        4.30         1.5         2.5         2.5         2.5         3.0         3.5
         355           2          19           7           3           0       22.75       24.65       24.30          11          10           9         1.0         1.0         1.0         4.0         4.0         4.0         3.5         3.0         4.0         2.0         1.0         1.5         4.0         4.0         4.0         1.5         1.5         2.0    3.83    3.67    4.00    1.50    1.17    1.50         4.1         4.1         3.6         1.3         1.8         1.5        4.40        4.15        4.05         2.0         2.0         2.0         2.5         2.5         2.5
         356           1          24           7           3           0       22.35       23.20       21.40          16          11          21         1.0         1.0         1.0         2.0         3.0         2.0         2.0         2.5         2.0         1.0         1.0         1.0         2.0         3.0         2.5         1.0         1.5         1.5    2.00    2.83    2.17    1.00    1.17    1.17         3.0         4.0         3.5         1.7         1.6         1.8        3.65        4.20        3.85         2.5         2.0         2.0         4.0         3.5         3.0
         357           1          26           8           3           0       14.55       99.00       17.85          23          99          15         1.0        99.0        99.0         2.5        99.0        99.0         2.5        99.0        99.0         1.0        99.0        99.0         2.5        99.0        99.0         2.0        99.0        99.0    2.50   99.00   99.00    1.33   99.00   99.00         3.6        99.0        99.0         2.1        99.0        99.0        3.75       99.00       99.00         3.0        99.0         3.0         3.5        99.0         3.5
         358           1          48          10           5          99       26.15       99.00       99.00          13          99          99         1.0        99.0        99.0         3.5        99.0        99.0         2.0        99.0        99.0         1.0        99.0        99.0         4.0        99.0        99.0         1.0        99.0        99.0    3.17   99.00   99.00    1.00   99.00   99.00         4.1        99.0        99.0         1.3        99.0        99.0        4.40       99.00       99.00         2.0        99.0        99.0         4.0        99.0        99.0
         359           1          28           7           3           0       13.20       15.00       13.55          23          21          20         1.0         1.5         1.0         2.5         1.5         1.5         2.0         2.5         2.5         2.0         2.5         2.0         1.5         2.0         1.5         3.0         3.0         3.0    2.00    2.00    1.83    2.00    2.33    2.00         1.6         2.5         2.0         1.7         1.8         1.3        2.95        3.35        3.35         4.0         4.0         3.5         3.0         2.0         3.5
         360           1          51           7           6          99       15.05       21.85       99.00          28          12          99         2.5         1.0        99.0         2.0         3.5        99.0         1.5         3.5        99.0         1.5         1.0        99.0         1.0         3.5        99.0         2.0         1.0        99.0    1.50    3.50   99.00    2.00    1.00   99.00         1.2         4.0        99.0         3.0         1.2        99.0        2.10        4.40       99.00         4.0         4.0        99.0         3.0         4.0        99.0
         361           1          20           7           3           0       14.90       15.85       15.75          14          15          17         1.5         1.0         2.0         2.0         2.0         2.0         2.0         1.5         3.0         1.0         1.5         2.0         1.5         2.0         2.0         3.0         3.0         3.5    1.83    1.83    2.33    1.83    1.83    2.50         3.2         3.7         3.4         2.7         2.4         3.0        3.25        3.65        3.20         4.5         4.0         4.5         3.5         3.5         3.5
         362           1          22           7           3           0       15.60       99.00       11.05          28          99          32         2.0        99.0         3.0         4.0        99.0         3.0         4.0        99.0         3.0         2.0        99.0         1.5         2.5        99.0         2.0         3.0        99.0         4.0    3.50   99.00    2.67    2.33   99.00    2.83         3.3        99.0         2.7         3.3        99.0         3.4        3.00       99.00        2.65         4.5        99.0         5.0         4.5        99.0         3.0
         363           1          27          10           3           0       24.30       23.15       99.00          21          17          99         1.0         1.0        99.0         4.0         4.0        99.0         3.0         4.0        99.0         1.5         2.0        99.0         4.0         3.5        99.0         2.5         2.0        99.0    3.67    3.83   99.00    1.67    1.67   99.00         4.8         4.3        99.0         2.8         2.1        99.0        4.00        4.10       99.00         3.5         3.0        99.0         2.5         2.5        99.0
         364           1          28           8           3           0       19.05       19.90       18.55          23          21          20         1.0         1.0         1.0         2.5         2.0         3.0         3.0         2.5         3.0         2.0         2.0         2.0         3.0         3.0         3.0         2.0         2.0         2.0    2.83    2.50    3.00    1.67    1.67    1.67         3.3         3.4         3.4         2.7         2.5         2.4        3.30        3.45        3.50         4.0         3.0         4.0         2.0         2.5         2.5
         365           2          22           7           3           0       11.15       12.30       99.00          34          21          99         1.0         1.0        99.0         1.0         2.0        99.0         2.5         2.0        99.0         2.5         2.0        99.0         1.0         1.5        99.0         4.0         3.0        99.0    1.50    1.83   99.00    2.50    2.00   99.00         1.7         2.6        99.0         3.9         3.1        99.0        1.90        2.75       99.00         4.0         4.0        99.0         2.0         3.0        99.0
         366           2          43           8           5          99       18.50       18.55       16.85          22          23          17         1.0         1.5         1.0         3.0         3.0         3.0         1.0         2.0         2.0         2.0         1.0         1.0         2.0         2.0         2.5         1.0         1.0         1.5    2.00    2.33    2.50    1.33    1.17    1.17         3.5         3.1         3.3         2.3         2.0         2.3        3.60        3.55        3.50         3.5         3.5         3.5         4.0         4.0         4.0
         367           1          24           7           3           0       19.15       99.00       99.00          16          99          99         1.5        99.0        99.0         2.0        99.0        99.0         3.0        99.0        99.0         1.0        99.0        99.0         2.0        99.0        99.0         3.0        99.0        99.0    2.33   99.00   99.00    1.83   99.00   99.00         2.5        99.0        99.0         1.9        99.0        99.0        3.30       99.00       99.00         2.0        99.0        99.0         2.0        99.0        99.0
         368           1          21           7           3           0       15.95       15.00       99.00          27          30          99         1.0         2.0        99.0         2.5         2.5        99.0         2.5         3.0        99.0         2.0         2.0        99.0         2.0         1.5        99.0         3.0         3.0        99.0    2.33    2.33   99.00    2.00    2.33   99.00         2.4         2.2        99.0         3.5         2.8        99.0        2.45        2.70       99.00         4.5         4.0        99.0         3.0         3.5        99.0
         369           1          20           7           3           0       14.60       99.00       99.00          30          99          99         1.0        99.0        99.0         2.0        99.0        99.0         3.0        99.0        99.0         2.0        99.0        99.0         2.5        99.0        99.0         4.0        99.0        99.0    2.50   99.00   99.00    2.33   99.00   99.00         1.7        99.0        99.0         2.9        99.0        99.0        2.40       99.00       99.00         5.0        99.0        99.0         1.5        99.0        99.0
         370           1          31           7           3           0       20.65       18.20       19.75          12          15           8         1.0         1.0         1.0         2.5         4.0         3.0         3.5         4.0         3.0         1.0         1.0         1.5         3.5         4.0         3.0         1.5         1.0         2.0    3.17    4.00    3.00    1.17    1.00    1.50         4.1         3.7         4.2         2.1         2.1         2.4        4.00        3.80        3.90         2.5         3.0         3.0         4.5         4.5         4.5
         371           1          22           7           3           0       16.90       99.00       99.00          22          99          99         1.5        99.0        99.0         3.0        99.0        99.0         2.5        99.0        99.0         1.5        99.0        99.0         3.0        99.0        99.0         2.5        99.0        99.0    2.83   99.00   99.00    1.83   99.00   99.00         3.4        99.0        99.0         3.0        99.0        99.0        3.20       99.00       99.00         4.0        99.0        99.0         3.5        99.0        99.0
         372           1          19           7           3           0       17.90       99.00       18.15          17          99           9         1.0        99.0         2.5         3.0        99.0         3.0         2.0        99.0         2.0         1.0        99.0         1.5         2.0        99.0         2.5         2.0        99.0         3.5    2.33   99.00    2.50    1.33   99.00    2.50         4.0        99.0         3.9         2.1        99.0         1.3        3.95       99.00        4.30         3.0        99.0         2.0         4.5        99.0         5.0
         373           1          49          10           4          99       20.25       99.00       99.00          12          99          99         1.5        99.0        99.0         3.5        99.0        99.0         3.0        99.0        99.0         1.5        99.0        99.0         3.0        99.0        99.0         2.0        99.0        99.0    3.17   99.00   99.00    1.67   99.00   99.00         3.4        99.0        99.0         1.9        99.0        99.0        3.75       99.00       99.00         2.0        99.0        99.0         4.5        99.0        99.0
         374           1          22           7           3           0       10.95       99.00       99.00          31          99          99         3.0        99.0        99.0         1.5        99.0        99.0         3.0        99.0        99.0         2.0        99.0        99.0         1.0        99.0        99.0         3.5        99.0        99.0    1.83   99.00   99.00    2.83   99.00   99.00         1.1        99.0        99.0         2.8        99.0        99.0        2.15       99.00       99.00         4.0        99.0        99.0         2.5        99.0        99.0
         375           1          33           6           4          99       14.85       12.75       12.35          26          23          24         1.5         1.0         1.0         2.5         2.5         2.5         2.5         2.0         1.5         1.5         1.5         1.5         2.0         2.0         2.0         3.0         3.5         3.0    2.33    2.17    2.00    2.00    2.00    1.83         3.2         2.8         2.8         2.0         2.6         2.5        3.60        3.10        3.15         4.5         4.5         4.5         4.5         4.0         3.5
         376           1          19           7           3           0       14.05       14.55       14.15          29          32          27         1.0         1.0         1.0         2.0         2.0         2.0         2.5         2.0         2.5         1.0         1.5         1.0         2.0         2.0         2.0         4.0         4.0         4.0    2.17    2.00    2.17    2.00    2.17    2.00         2.2         2.1         2.2         2.6         2.8         2.3        2.80        2.65        2.95         3.5         3.5         3.5         3.5         3.5         3.5
         377           2          25           7           3           0       11.70       99.00       99.00          28          99          99         2.0        99.0        99.0         2.5        99.0        99.0         1.5        99.0        99.0         1.5        99.0        99.0         1.5        99.0        99.0         3.0        99.0        99.0    1.83   99.00   99.00    2.17   99.00   99.00         2.3        99.0        99.0         3.2        99.0        99.0        2.55       99.00       99.00         4.5        99.0        99.0         1.5        99.0        99.0
         378           2          25           7           4          99       15.50       99.00       99.00          22          99          99         1.0        99.0        99.0         2.0        99.0        99.0         1.5        99.0        99.0         1.0        99.0        99.0         3.0        99.0        99.0         3.0        99.0        99.0    2.17   99.00   99.00    1.67   99.00   99.00         2.6        99.0        99.0         2.2        99.0        99.0        3.20       99.00       99.00         4.0         4.0        99.0         4.5         4.5        99.0
         379           1          42           7           4          99       15.00       15.50       16.05          14          21          29         1.0         1.0         2.0         3.0         2.0         3.0         1.5         2.5         2.5         1.0         1.5         1.0         2.5         2.5         2.0         2.0         1.5         1.5    2.33    2.33    2.50    1.33    1.33    1.50         3.2         2.4         2.9         1.7         1.9         3.5        3.75        3.25        2.70         2.5         3.0         3.5         3.5         3.5         3.0
         380           1          25           7           3           0       15.55       99.00       99.00          23          23          99         1.0         1.0        99.0         2.5         2.5        99.0         2.0         1.5        99.0         1.5         1.5        99.0         2.0         2.0        99.0         2.5         2.5        99.0    2.17    2.00   99.00    1.67    1.67   99.00         2.9         2.8        99.0         2.4         2.6        99.0        3.25        3.10       99.00         3.0         4.0        99.0         4.0         3.5        99.0
         381           1          19           7           3           0       17.95       19.65       21.40          22          11           6         1.0         1.0         1.0         2.0         3.0         2.0         3.5         3.5         2.5         2.0         1.0         1.0         3.0         3.0         1.5         1.5         2.0         1.0    2.83    3.17    2.00    1.50    1.33    1.00         4.0         4.0         3.7         2.0         1.6         1.2        4.00        4.20        4.25         2.0         2.0         2.0         2.5         2.5         3.0
         382           1          45           6           4          99       15.75       14.30       99.00          25          27          99         1.0         2.0        99.0         2.5         2.0        99.0         2.0         2.5        99.0         2.0         3.0        99.0         2.0         1.5        99.0         3.0         3.5        99.0    2.17    2.00   99.00    2.00    2.83   99.00         2.7         2.9        99.0         2.4         3.0        99.0        3.15        2.95       99.00         3.5         3.5        99.0         4.5         4.5        99.0
         383           2          25           8           3           0       21.15       22.85       99.00          11          15          99         1.0         1.0        99.0         2.0         3.0        99.0         3.0         3.0        99.0         2.5         1.5        99.0         3.0         2.5        99.0         1.0         1.5        99.0    2.67    2.83   99.00    1.50    1.33   99.00         4.0        99.0        99.0         1.9        99.0        99.0        4.05       99.00       99.00         2.5         2.0        99.0         4.0         4.0        99.0
         384           2          28           7           3           0       13.70       99.00       99.00          22          99          99         1.0        99.0        99.0         3.0        99.0        99.0         2.5        99.0        99.0         1.0        99.0        99.0         3.5        99.0        99.0         2.5        99.0        99.0    3.00   99.00   99.00    1.50   99.00   99.00         3.6        99.0        99.0         3.8        99.0        99.0        2.90       99.00       99.00         4.5        99.0        99.0         3.5        99.0        99.0
         385           3          33           7           3           0       13.50       11.45       10.30          26          17          32         1.0         1.0        99.0         1.0         1.5        99.0         2.0         1.0        99.0         1.0         1.5        99.0         1.5         1.5        99.0         3.5         3.5        99.0    1.50    1.33   99.00    1.83    2.00   99.00         3.9         2.7        99.0         1.8         1.1        99.0        4.05        3.80       99.00         3.5         3.5         3.5         3.5         4.0         3.5
         386           2          27           8           3           0       19.70       99.00       99.00          25          99          99         1.0        99.0        99.0         2.5        99.0        99.0         2.5        99.0        99.0         1.0        99.0        99.0         2.0        99.0        99.0         2.0        99.0        99.0    2.33   99.00   99.00    1.33   99.00   99.00         2.8        99.0        99.0         2.8        99.0        99.0        3.00       99.00       99.00         4.0        99.0        99.0         3.0        99.0        99.0
         387           1          31          10           3           0       16.15       16.15       14.95          32          29          29         2.5         1.0         1.0         3.5         3.0         2.0         2.5         2.0         1.0         1.0         1.0         1.0         4.0         3.0         3.5         3.0         2.0         2.0    3.33    2.67    2.17    2.17    1.33    1.33         3.6         3.2         2.7         2.9         2.9         2.8        3.35        3.15        2.95         4.0         4.5         4.5         4.5         4.0         4.0
         388           1          20           7           3           0        9.85        9.00        9.15          11          14          25         1.0         1.0         1.0         3.5         2.0         2.5         1.0         1.0         1.5         1.0         1.0         1.0         2.5         1.0         1.5         3.0         2.0         3.0    2.33    1.33    1.83    1.67    1.33    1.67         2.9         3.8         2.5         2.3         1.1         1.8        3.30        4.35        3.35         3.0         1.5         4.5         4.5         4.0         3.5
         389           1          22           7           3           0       15.55       15.20       99.00          16          19          99         2.0         1.5        99.0         2.0         2.0        99.0         4.0         2.5        99.0         1.0         1.5        99.0         3.0         2.0        99.0         2.5         2.0        99.0    3.00    2.17   99.00    1.83    1.67   99.00         3.8         4.0        99.0         1.7         1.7        99.0        4.05        4.15       99.00         2.5         2.0         4.0         3.5         3.0         3.5
         390           2          61           6           5          99       26.70       26.40       27.00           2           3           7         1.0         1.5         1.0         4.0         4.0         2.5         2.5         3.0         3.0         1.0         1.0         1.0         3.5         4.0         4.0         1.5         2.0         1.0    3.33    3.67    3.17    1.17    1.50    1.00         4.8         4.9         4.6         1.1         1.0         1.0        4.85        4.95        4.80         1.0         2.0         1.5         4.5         4.5         4.5
         391           1          26           8           5          99       19.75       99.00       99.00          18          99          99         1.0        99.0        99.0         3.0        99.0        99.0         3.5        99.0        99.0         1.0        99.0        99.0         4.0        99.0        99.0         3.0        99.0        99.0    3.50   99.00   99.00    1.67   99.00   99.00         3.8        99.0        99.0         2.0        99.0        99.0        3.90       99.00       99.00         2.0        99.0        99.0         2.0        99.0        99.0
         392           2          34           8           5          99       15.95       16.45       18.80          25          16          26         1.0         1.0         1.5         3.0         2.5         3.5         3.5         2.5         2.5         2.0         1.0         1.0         2.5         2.5         2.5         4.0         2.5         2.5    3.00    2.50    2.83    2.33    1.50    1.67         3.6         3.4         2.9         2.3         2.1         2.8        3.65        3.65        3.05         3.0         2.5         2.5         3.0         3.0         3.0
         393           1          20           7           3           0       15.25       15.35       15.55          22          27          23         1.0         1.0         1.0         2.0         3.0         2.0         2.5         2.5         3.5         1.0         1.0         3.0         1.5         1.5         3.0         3.0         2.0         2.0    2.00    2.33    2.83    1.67    1.33    2.00         2.9         1.7         2.8         2.2         2.5         2.4        3.35        2.60        3.20         5.0         4.5         5.0         4.0         4.0         4.0
         394           1          28           7           3           0       26.00       23.80       26.30          11          18          12         1.0         1.0         1.0         3.0         3.5         3.5         4.0         4.0         2.5         1.5         1.5         1.0         3.5         3.5         3.5         1.0         1.0         1.0    3.50    3.67    3.17    1.17    1.17    1.00         4.0         3.6         3.7         1.7         2.5         2.4        4.15        3.55        3.65         3.0         2.5         2.5         3.0         2.5         2.5
         395           1          34          10           4          99       21.65       99.00       99.00          16          99          99         1.0        99.0        99.0         2.5        99.0        99.0         3.0        99.0        99.0         1.0        99.0        99.0         2.5        99.0        99.0         2.0        99.0        99.0    2.67   99.00   99.00    1.33   99.00   99.00         3.8        99.0        99.0         1.8        99.0        99.0        4.00       99.00       99.00         3.0        99.0        99.0         4.0        99.0        99.0
         396           2          28           8           3           0       15.10       13.95       15.25          21          27          23         1.0         1.0         1.0         2.5         3.5         3.0         3.0         2.5         2.0         2.0         2.5         1.0         2.0         1.5         1.5         4.0         3.0         3.0    2.50    2.50    2.17    2.33    2.17    1.67         3.9         4.3         3.8         2.7         3.4         3.1        3.60        3.45        3.35         4.0         4.0         4.0         4.5         4.0         5.0
         397           1          28           8           3           0       15.75       14.00       12.05          30          25          22         1.0         1.0         1.0         2.0         2.5         2.0         1.5         1.5         1.0         1.5         1.5         1.0         2.0         2.0         1.5         3.0         3.0         3.0    1.83    2.00    1.50    1.83    1.83    1.67         2.7         2.8         2.6         4.1         3.2         3.2        2.30        2.80        2.70         4.0         4.0         4.5         2.5         3.0         4.0
         398           1          22           7           3           0       18.50       16.90       99.00          17          16          99         1.0         1.5        99.0         2.0         3.5        99.0         3.0         2.0        99.0         2.0         2.0        99.0         2.0         2.0        99.0         2.0         1.5        99.0    2.33    2.50   99.00    1.67    1.67   99.00         2.0         3.6        99.0         1.6         1.8        99.0        3.20        3.90       99.00         3.0         3.0        99.0         2.0         1.5        99.0
         399           3          28           8           3           0       18.95       17.50       18.75          19          20          15         1.0         1.0         1.0         3.0         2.5         3.0         3.0         3.0         3.0         1.0         1.5         1.5         1.0         2.0         1.5         2.0         2.0         2.0    2.33    2.50    2.50    1.33    1.50    1.50         3.1         2.8         3.0         1.9         2.0         1.5        3.60        3.40        3.75         4.0         3.0         3.5         3.5         3.5         3.5
         400           2          27           9           6          99       19.35       99.00       99.00          20          99          99         1.5        99.0        99.0         2.5        99.0        99.0         2.5        99.0        99.0         1.0        99.0        99.0         2.5        99.0        99.0         2.5        99.0        99.0    2.50   99.00   99.00    1.67   99.00   99.00         2.7        99.0        99.0         1.4        99.0        99.0        3.65       99.00       99.00         3.5        99.0        99.0         3.0        99.0        99.0
         401           1          25           7           3           0       21.20       23.20       99.00          21          22          99         1.0        99.0        99.0         3.0        99.0        99.0         3.0        99.0        99.0         1.0        99.0        99.0         3.0        99.0        99.0         2.0        99.0        99.0    3.00   99.00   99.00    1.33   99.00   99.00         3.6        99.0        99.0         2.3        99.0        99.0        3.65       99.00       99.00         3.5         2.5        99.0         3.0         4.0        99.0
         402           1          21           7           3           0       14.55       14.80       99.00          27          31          99         1.0        99.0        99.0         2.0        99.0        99.0         1.5        99.0        99.0         2.0        99.0        99.0         1.0        99.0        99.0         4.0        99.0        99.0    1.50   99.00   99.00    2.33   99.00   99.00         1.8        99.0        99.0         2.0        99.0        99.0        2.90       99.00       99.00         4.5         4.5        99.0         2.5         2.5        99.0
         403           2          23           7           3           0       19.45       99.00       99.00          15          99          99         1.0        99.0        99.0         3.0        99.0        99.0         3.5        99.0        99.0         1.0        99.0        99.0         3.0        99.0        99.0         1.5        99.0        99.0    3.17   99.00   99.00    1.17   99.00   99.00         2.6        99.0        99.0         1.1        99.0        99.0        3.75       99.00       99.00         1.5        99.0        99.0         3.0        99.0        99.0
         404           1          25           8           2          99       15.60       13.40       13.90          18          15          17         1.0         1.0         1.5         2.5         2.0         2.0         2.0         2.0         1.5         1.5         1.0         1.0         2.5         3.0         3.0         2.0         2.0         2.0    2.33    2.33    2.17    1.50    1.33    1.50         4.0         3.3         3.3         2.2         3.5         2.9        3.90        2.90        3.20         4.0         4.0         4.0         4.5         4.0         4.0
         405           1          33           7           7          99       22.35       99.00       99.00          18          99          99         1.5        99.0        99.0         2.5        99.0        99.0         3.0        99.0        99.0         2.0        99.0        99.0         3.0        99.0        99.0         2.0        99.0        99.0    2.83   99.00   99.00    1.83   99.00   99.00         3.4        99.0        99.0         1.7        99.0        99.0        3.85       99.00       99.00         2.5        99.0        99.0         3.5        99.0        99.0
         406           1          28           7           4          99       14.70       14.25       14.85          29          26          26         1.0         1.5         2.0         3.0         2.5         2.5         2.0         2.0         1.5         1.5         1.5         1.5         2.5         2.0         2.5         1.5         2.0         2.5    2.50    2.17    2.17    1.33    1.67    2.00         3.3         3.6         3.3         2.6         2.3         2.4        3.35        3.65        3.45         4.0         4.0         4.0         2.5         3.0         3.0
         407           1          20           7           3           0       20.15       19.40       22.30          11          10           7         1.0         2.0         2.0         2.5         3.5         3.5         2.0         2.0         2.5         1.0         1.5         1.0         2.5         2.5         3.0         2.0         1.5         2.0    2.33    2.67    3.00    1.33    1.67    1.67         4.3         4.5         4.4         1.2         1.3         1.2        4.55        4.60        4.60         3.0         3.0         2.5         5.0         5.0         5.0
         408           2          25           7           3           0       16.85       99.00       99.00          16          99          99         2.5        99.0        99.0         3.0        99.0        99.0         2.0        99.0        99.0         1.0        99.0        99.0         1.5        99.0        99.0         3.0        99.0        99.0    2.17   99.00   99.00    2.17   99.00   99.00         3.0        99.0        99.0         2.0        99.0        99.0        3.50       99.00       99.00         3.0        99.0        99.0         3.0        99.0        99.0
         409           1          26           8           3           0       99.00       99.00       23.10          99          99           9        99.0        99.0         1.5        99.0        99.0         4.0        99.0        99.0         3.5        99.0        99.0         1.0        99.0        99.0         2.5        99.0        99.0         1.0   99.00   99.00    3.33   99.00   99.00    1.17        99.0        99.0         4.4        99.0        99.0         1.4       99.00       99.00        4.50         2.0        99.0         1.5         4.5        99.0         5.0
         410           1          20           7           3           0       12.55       13.15       13.90          27          26          14         1.0         1.0         1.0         1.5         2.0         2.0         2.0         2.5         2.0         2.5         2.0         1.5         1.0         1.0         1.0         4.0         3.0         3.5    1.50    1.83    1.67    2.50    2.00    2.00         2.8         3.1         3.4         3.1         3.6         1.7        2.85        2.75        3.85         4.0         4.5         4.0         3.0         3.0         3.0
         411           2          31          10           3           0       22.95       99.00       99.00          12          99          99         1.0        99.0        99.0         2.0        99.0        99.0         3.0        99.0        99.0         2.0        99.0        99.0         4.0        99.0        99.0         2.5        99.0        99.0    3.00   99.00   99.00    1.83   99.00   99.00         3.5        99.0        99.0         1.5        99.0        99.0        4.00       99.00       99.00         2.5        99.0        99.0         2.5        99.0        99.0
         412           1          20           7           3           0       16.75       14.85       99.00          25          28          99         3.0         2.5        99.0         2.0         1.5        99.0         2.0         2.0        99.0         2.0         2.5        99.0         2.0         1.5        99.0         1.0         1.5        99.0    2.00    1.67   99.00    2.00    2.17   99.00         3.3         2.3        99.0         1.9         1.8        99.0        3.70        3.25       99.00         2.5         3.5        99.0         3.5         3.5        99.0
         413           1          32           8           4          99       13.25       99.00       99.00          28          99          99         1.0        99.0        99.0         2.5        99.0        99.0         1.5        99.0        99.0         1.0        99.0        99.0         1.0        99.0        99.0         3.0        99.0        99.0    1.67   99.00   99.00    1.67   99.00   99.00         2.4        99.0        99.0         3.0        99.0        99.0        2.70       99.00       99.00         4.0        99.0        99.0         3.0        99.0        99.0
         414           1          22           8           3           0       15.55       16.70       18.50          25          18          18         1.0         1.5         1.0         3.0         3.0         3.5         2.0         2.0         2.0         1.5         1.0         1.0         3.0         2.5         1.5         2.5         3.0         2.5    2.67    2.50    2.33    1.67    1.83    1.50         4.1         4.7         4.7         2.4         2.3         2.1        3.85        4.20        4.30         3.0         2.5         2.5         3.5         3.5         3.5
         415           1          23           7           3           1       19.75       99.00       99.00          19          99          99         1.0        99.0        99.0         2.5        99.0        99.0         3.0        99.0        99.0         1.0        99.0        99.0         2.0        99.0        99.0         2.0        99.0        99.0    2.50   99.00   99.00    1.33   99.00   99.00         2.3        99.0        99.0         1.7        99.0        99.0        3.30       99.00       99.00         4.5         4.0        99.0         3.5         3.0        99.0
         416           1          25           8           2          99       16.00       99.00       99.00          14          99          99         1.0        99.0        99.0         2.0        99.0        99.0         2.0        99.0        99.0         1.0        99.0        99.0         4.0        99.0        99.0         3.0        99.0        99.0    2.67   99.00   99.00    1.67   99.00   99.00         3.9        99.0        99.0         2.3        99.0        99.0        3.80       99.00       99.00         3.5        99.0        99.0         4.0        99.0        99.0
         417           1          23           7           3           0       15.90       99.00       99.00          12          99          99         1.0        99.0        99.0         3.5        99.0        99.0         3.0        99.0        99.0         1.5        99.0        99.0         4.0        99.0        99.0         2.0        99.0        99.0    3.50   99.00   99.00    1.50   99.00   99.00         2.7        99.0        99.0         1.2        99.0        99.0        3.75       99.00       99.00         4.5        99.0        99.0         2.5        99.0        99.0
         418           1          23           7           3           0       18.00       20.35       18.30          15          18          19         1.5         3.0         3.0         4.0         4.0         3.0         3.5         2.0         1.5         1.5         1.0         1.0         3.0         2.0         1.0         1.0         1.0         2.0    3.50    2.67    1.83    1.33    1.67    2.00         3.7         3.6         2.7         1.4         1.9         2.5        4.15        3.85        3.10         4.0         2.0         2.0         3.5         3.5         4.5
         419           1          21           7           3           0       16.35       17.85       18.30          27          19          20         1.0         1.0         1.5         4.0         2.5         3.0         2.5         2.5         2.0         1.0         1.0         1.0         3.5         3.0         3.0         1.5         3.0         2.0    3.33    2.67    2.67    1.17    1.67    1.50         2.7         3.4         3.5         2.5         1.6         2.0        3.10        3.90        3.75         4.0         4.0         4.0         3.0         4.5         2.5
         420           1          20           7           3           0       16.75       99.00       99.00          19          99          99         2.0        99.0        99.0         2.0        99.0        99.0         2.0        99.0        99.0         2.5        99.0        99.0         2.0        99.0        99.0         2.0        99.0        99.0    2.00   99.00   99.00    2.17   99.00   99.00         2.4        99.0        99.0         2.5        99.0        99.0        2.95       99.00       99.00         3.5        99.0        99.0         2.0        99.0        99.0
         421           1          40          10           4          99       17.00       19.70       99.00          24          24          99         1.0         1.0        99.0         2.0         3.0        99.0         3.5         3.0        99.0         1.5         1.5        99.0         3.0         2.5        99.0         2.0         2.0        99.0    2.83    2.83   99.00    1.50    1.50   99.00         3.0         3.8        99.0         2.3         1.9        99.0        3.35        3.95       99.00         3.0         3.0        99.0         4.0         4.0        99.0
         422           1          21           7           3           1       23.25       99.00       22.75          99          99          13        99.0        99.0         2.0        99.0        99.0         3.0        99.0        99.0         2.0        99.0        99.0         1.5        99.0        99.0         3.0        99.0        99.0         2.0   99.00   99.00    2.67   99.00   99.00    1.83        99.0        99.0         3.5        99.0        99.0         1.2       99.00       99.00        4.15         2.0        99.0         3.0         4.0        99.0         4.0
         423           1          37           8           4          99       12.75       12.30       11.55          23          28          22         3.0         2.0         2.5         2.5         2.5         2.0         1.5         1.0         2.0         2.0         1.0         2.0         2.0         1.0         1.5         2.5         3.0         2.0    2.00    1.50    1.83    2.50    2.00    2.17         3.6         4.1         2.3         2.0         2.0         1.6        3.80        4.05        3.35         3.0         2.5         2.0         4.5         4.5         4.0
         424           1          46           8           4          99       18.05       17.25       18.80          25          27          26         1.0         1.0         1.0         2.0         3.0         2.0         2.0         1.0         2.0         1.5         1.5         2.5         3.0         1.0         2.0         1.5         2.5         2.0    2.33    1.67    2.00    1.33    1.67    1.83         3.2         3.5         3.7         1.9         1.8         1.9        3.65        3.85        3.90         3.5         3.5         3.5         4.5         5.0         4.5
         425           2          25           7           3           0       12.20       99.00       99.00          29          99          99         2.0        99.0        99.0         2.5        99.0        99.0         3.5        99.0        99.0         2.0        99.0        99.0         1.5        99.0        99.0         3.0        99.0        99.0    2.50   99.00   99.00    2.33   99.00   99.00         3.3        99.0        99.0         2.8        99.0        99.0        3.25       99.00       99.00         4.0        99.0        99.0         1.5        99.0        99.0
         426           2          24           7           3           0       15.25       15.40       15.30          23          35          27         1.0         1.0         1.0         2.0         2.5         2.0         1.5         2.0         2.0         1.5         2.0         1.5         2.0         1.5         2.0         2.5         4.0         4.0    1.83    2.00    2.00    1.67    2.33    2.17         2.9         2.5         2.1         2.2         3.9         3.7        3.35        2.30        2.20         3.0         4.0         4.5         2.0         1.5         2.0
         427           2          23           6           3           0       13.25       13.75       99.00          26          29          99         1.5         1.0        99.0         2.5         3.0        99.0         1.0         1.0        99.0         1.0         1.0        99.0         2.0         1.5        99.0         4.0         4.0        99.0    1.83    1.83   99.00    2.17    2.00   99.00         1.9         1.8        99.0         2.3         3.6        99.0        2.80        2.10       99.00         4.0         4.5         3.5         3.0         2.5         2.0
         428           1          26           8           6          99       13.95       99.00       99.00          28          99          99         1.5        99.0        99.0         2.0        99.0        99.0         1.0        99.0        99.0         2.0        99.0        99.0         1.5        99.0        99.0         1.5        99.0        99.0    1.50   99.00   99.00    1.67   99.00   99.00         3.8        99.0        99.0         2.2        99.0        99.0        3.80       99.00       99.00         4.0        99.0        99.0         3.0        99.0        99.0
         429           1          25           7           3           1       16.75       99.00       99.00          19          99          99         1.0        99.0        99.0         1.5        99.0        99.0         3.0        99.0        99.0         2.0        99.0        99.0         3.0        99.0        99.0         1.5        99.0        99.0    2.50   99.00   99.00    1.50   99.00   99.00         3.0        99.0        99.0         1.2        99.0        99.0        3.90       99.00       99.00         3.5         4.0        99.0         2.0         3.0        99.0
         430           1          24           7           3           0       17.90       99.00       15.65          25          99          29         1.0        99.0         1.5         3.0        99.0         2.5         3.5        99.0         2.5         1.0        99.0         2.0         3.0        99.0         3.0         2.0        99.0         4.0    3.17   99.00    2.67    1.33   99.00    2.50         3.1        99.0        99.0         3.6        99.0         3.5        2.75       99.00       99.00         4.0        99.0         4.5         3.0        99.0         3.0
         431           1          19           7           3           0       17.85       16.25       18.55          13          16          22         1.0         1.0         2.5         3.0         2.0         2.0         3.5         3.0         1.5         1.0         1.5         1.5         2.5         3.0         1.0         2.0         1.0         2.0    3.00    2.67    1.50    1.33    1.17    2.00         3.7         3.9         4.2         1.8         1.7         2.2        3.95        4.10        4.00         3.5         3.0         3.0         4.5         5.0         5.0
         432           1          20           7           3           0       21.25       20.95       99.00          21          26          99         1.5         1.0        99.0         3.5         3.0        99.0         2.0         2.5        99.0         1.0         1.0        99.0         3.5         2.0        99.0         1.5         1.0        99.0    3.00    2.50   99.00    1.33    1.00   99.00         2.9         2.9        99.0         2.0         2.0        99.0        3.45        3.45       99.00         3.0         3.0        99.0         3.0         3.0        99.0
         433           1          20           7           4          99       13.20       12.75       99.00          26          26          99         1.0         1.5        99.0         2.0         2.0        99.0         2.0         1.5        99.0         1.5         1.0        99.0         3.0         2.5        99.0         2.5         4.0        99.0    2.33    2.00   99.00    1.67    2.17   99.00         1.9         2.6        99.0         2.2         2.9        99.0        2.85        2.85       99.00         4.0         3.5        99.0         4.0         4.5        99.0
         434           1          24           7           3           0       23.10       20.30       17.80          16          23          23         1.0         1.0         1.0         1.5         2.0         2.0         3.0         2.0         1.5         2.0         2.0         1.5         2.5         1.5         1.5         1.0         1.0         1.5    2.33    1.83    1.67    1.33    1.33    1.33         3.6         3.0         3.0         1.4         1.6         1.6        4.10        3.70        3.70         3.0         3.0         3.5         3.0         3.0         3.0
         435           1          60           4           9          99       16.65       16.95       99.00          13          21          99         3.0         1.0        99.0         2.5         2.0        99.0         2.5         2.0        99.0         2.0         2.0        99.0         2.0         1.5        99.0         2.0         1.5        99.0    2.33    1.83   99.00    2.33    1.50   99.00         3.8         3.3        99.0         1.3         1.2        99.0        4.25        4.05       99.00         2.5         2.5        99.0         4.0         4.0        99.0
         436           2          61          10           9           0       11.60       13.20       12.10           9           6          15         1.0         1.0         1.0         1.5         2.0         2.5         1.0         3.0         3.0         1.5         2.5         1.5         1.0         1.0         1.0         1.5         1.0         1.0    1.17    2.00    2.17    1.33    1.50    1.17         4.2         3.7         3.7         1.6         1.4         1.7        4.30        4.15        4.00         3.5         3.0         3.0         4.5         4.0         4.5
         437           1          19           7           3           0       20.95       19.05       22.85          11          19           5         1.0         1.5         1.5         4.0         3.5         4.0         4.0         4.0         4.0         1.5         1.5         1.5         4.0         4.0         3.5         2.0         2.5         2.0    4.00    3.83    3.83    1.50    1.83    1.67         4.3         4.0         4.3         1.2         1.2         1.1        4.55        4.40        4.60         3.0         4.0         2.0         5.0         5.0         4.5
         438           1          26          10           4          99       18.25       99.00       99.00          18          99          99         1.5        99.0        99.0         3.0        99.0        99.0         2.0        99.0        99.0         1.5        99.0        99.0         3.0        99.0        99.0         2.5        99.0        99.0    2.67   99.00   99.00    1.83   99.00   99.00         2.8        99.0        99.0         2.3        99.0        99.0        3.25       99.00       99.00         3.5        99.0        99.0         2.5        99.0        99.0
         439           2          35           7           4          99       20.50       99.00       99.00          15          99          99         1.0        99.0        99.0         3.5        99.0        99.0         2.5        99.0        99.0         2.0        99.0        99.0         2.5        99.0        99.0         2.0        99.0        99.0    2.83   99.00   99.00    1.67   99.00   99.00         4.5        99.0        99.0         2.1        99.0        99.0        4.20       99.00       99.00         2.5        99.0        99.0         4.0        99.0        99.0
         440           1          24           8           3           0       18.90       17.15       19.95          13          27          24         1.5         2.5         1.0         3.0         3.5         3.0         3.0         2.5         2.5         1.0         1.5         1.5         2.5         2.5         2.0         3.0         3.0         3.0    2.83    2.83    2.50    1.83    2.33    1.83         2.8         2.9         2.2         3.1         2.8         1.9        2.85        3.05        3.15         4.0         3.0         3.0         2.5         2.5         2.5
         441           2          20           7           3           0       23.00       99.00       99.00           8          99          99         1.0        99.0        99.0         3.0        99.0        99.0         2.0        99.0        99.0         1.0        99.0        99.0         2.0        99.0        99.0         2.0        99.0        99.0    2.33   99.00   99.00    1.33   99.00   99.00         3.0        99.0        99.0         1.6        99.0        99.0        3.70       99.00       99.00         2.0         2.5         3.0         3.0         3.0         3.0
         442           2          43          10           4          99       21.15       20.10       99.00          18          19          99         1.5         2.0        99.0         3.5         4.0        99.0         3.0         2.5        99.0         1.0         1.0        99.0         3.5         4.0        99.0         2.0         2.0        99.0    3.33    3.50   99.00    1.50    1.67   99.00         3.1         3.8        99.0         2.0         2.2        99.0        3.55        3.80       99.00         2.0         1.5        99.0         3.5         3.5        99.0
         443           1          25           7           3           0       23.45       24.90       23.90          14          20          14         2.0         2.0         1.0         4.0         4.0         4.0         2.0         1.0         2.5         1.0         1.0         1.0         3.5         3.5         2.5         3.0         3.0         2.0    3.17    2.83    3.00    2.00    2.00    1.33         4.6         4.3         4.5         1.8         2.0         1.8        4.40        4.15        4.35         3.0         2.0         2.5         4.5         4.0         4.5
         444           2          33           7           3           0       13.75       16.05       14.50          21          24          17         1.5         1.5         1.5         3.0         2.5         3.0         2.0         2.0         1.5         1.5         1.0         1.0         2.5         2.0         2.5         2.5         2.0         2.5    2.50    2.17    2.33    1.83    1.50    1.67         2.8         2.6         2.9         2.8         3.3         3.0        3.00        2.65        2.95         4.5         3.0         4.0         3.0         3.0         3.0
         445           2          26           8           3           0       18.80       15.75       99.00          26          22          99         1.0         1.0        99.0         2.0         3.5        99.0         1.0         1.0        99.0         1.0         1.0        99.0         1.0         2.0        99.0         3.5         3.0        99.0    1.33    2.17   99.00    1.83    1.67   99.00         2.5         2.5        99.0         3.5         3.4        99.0        2.50        2.55       99.00         2.5         2.5         2.5         2.0         1.0         2.0
         446           1          18           7           4          99       17.70       18.15       18.35          22          19          12         1.0         1.0         1.0         1.5         3.0         3.0         3.0         4.0         2.5         2.0         1.0         1.0         1.0         2.0         2.0         2.5         1.5         2.5    1.83    3.00    2.50    1.83    1.17    1.50         2.3         2.8         2.8         1.9         1.4         1.9        3.20        3.70        3.45         4.0         4.0         4.0         3.0         3.0         2.5
         447           2          23           7           3           0       18.10       18.75       18.15          15          14          13         1.0         2.0         1.0         3.0         3.0         3.0         3.0         2.0         3.0         1.0         1.0         1.0         3.0         2.5         3.0         2.0         2.0         2.0    3.00    2.50    3.00    1.33    1.67    1.33         3.5         3.6         3.6         1.5         2.3         2.2        4.00        3.65        3.70         2.5         2.5         3.0         3.5         4.0         4.0
         448           1          24           7           7          99       23.05       99.00       21.10          15          99          17         1.0        99.0         1.0         3.5        99.0         2.0         4.0        99.0         3.0         1.5        99.0         2.0         4.0        99.0         3.0         1.5        99.0         2.0    3.83   99.00    2.67    1.33   99.00    1.67         4.3        99.0         4.0         1.9        99.0         1.4        4.20       99.00        4.30         4.0        99.0         3.5         4.0        99.0         3.0
         449           1          22           7           3           0       21.10       17.75       23.30          28          31          34         1.5         2.5         1.0         4.0         4.0         4.0         1.5         2.0         2.0         1.0         1.0         1.0         1.0         1.0         2.0         1.0         1.0         1.0    2.17    2.33    2.67    1.17    1.50    1.00         3.0         2.6         2.9         3.1         2.9         3.6        2.95        2.85        2.65         2.0         3.5         3.0         4.0         4.0         4.0
         450           1          28           8           3           0       15.60       16.25       99.00          25          21          99         1.0         1.0        99.0         3.0         2.0        99.0         2.5         3.0        99.0         1.0         1.5        99.0         2.0         2.0        99.0         3.0         2.0        99.0    2.50    2.33   99.00    1.67    1.50   99.00         3.5         3.4        99.0         2.7         2.8        99.0        3.40        3.30       99.00         4.0         4.0        99.0         2.5         2.5        99.0
         451           2          31           8           4          99       21.45       24.30       21.70          16          12           9         1.0         2.0        99.0         3.0         3.5        99.0         3.0         4.0        99.0         2.0         2.5        99.0         2.5         3.0        99.0         1.5         1.0        99.0    2.83    3.50   99.00    1.50    1.83   99.00         1.8         3.3        99.0         2.0         1.3        99.0        2.90        4.00       99.00         4.0         4.0         3.5         2.5         2.0         3.0
         452           2          34           7           6          99       14.20       11.45       99.00          29          27          99         2.0         1.5        99.0         2.0         2.0        99.0         2.0         1.5        99.0         2.0         1.5        99.0         2.0         1.5        99.0         2.0         2.5        99.0    2.00    1.67   99.00    2.00    1.83   99.00         2.3         1.8        99.0         3.8         3.6        99.0        2.25        2.10       99.00         4.5         4.0        99.0         2.5         2.0        99.0
         453           1          23           7           3           0       14.65       12.95       13.25          29          28          27         2.0         3.0         3.0         3.5         3.0         3.0         3.0         3.0         3.0         1.0         2.0         3.0         2.5         3.0         3.0         3.0         3.0         3.0    3.00    3.00    3.00    2.00    2.67    3.00         3.3         4.0         3.2         2.6         2.6         3.8        3.35        3.70        2.70         5.0         4.5         4.0         5.0         4.5         3.0
         454           1          32           8           3           0       14.25       19.85       20.70          23          17          18         1.0         1.0         1.0         3.0         3.5         3.5         2.5         3.0         4.0         2.0         1.0         1.0         3.5         3.0         3.5         1.5         2.0         1.5    3.00    3.17    3.67    1.50    1.33    1.17         3.8         3.9         3.9         2.4         1.7         1.9        3.70        4.10        4.00         3.0         2.0         3.0         3.0         2.5         2.5
         455           1          26           8           3           0       14.90       15.00       99.00          24          21          99         1.0         1.0        99.0         2.0         2.0        99.0         2.0         2.5        99.0         1.0         1.0        99.0         2.0         2.0        99.0         2.5         2.5        99.0    2.00    2.17   99.00    1.50    1.50   99.00         3.1         2.7        99.0         1.8         1.9        99.0        3.65        3.40       99.00         4.0         4.0        99.0         2.5         3.0        99.0
         456           1          27           8           3           0       15.75       16.75       15.10          27          26          28         2.5         2.5         2.5         2.5         2.0         3.0         1.5         2.0         1.0         1.0         1.0         1.0         2.5         3.0         2.0         2.5         3.0         3.0    2.17    2.33    2.00    2.00    2.17    2.17         3.2         2.7         2.4         2.4         2.9         3.3        3.40        2.90        2.55         4.0         4.0         4.5         3.0         3.0         3.0
         457           2          25           8           3           0       22.95       99.00       99.00          13          99          99         1.0        99.0        99.0         2.0        99.0        99.0         2.5        99.0        99.0         1.5        99.0        99.0         3.0        99.0        99.0         1.0        99.0        99.0    2.50   99.00   99.00    1.17   99.00   99.00         3.7        99.0        99.0         1.0        99.0        99.0        4.35       99.00       99.00         1.0        99.0        99.0         1.5        99.0        99.0
         458           2          31           7           3           0       17.10       99.00       99.00          23          99          99         1.5        99.0        99.0         4.0        99.0        99.0         2.0        99.0        99.0         1.0        99.0        99.0         3.0        99.0        99.0         3.0        99.0        99.0    3.00   99.00   99.00    1.83   99.00   99.00         3.2        99.0        99.0         2.7        99.0        99.0        3.25       99.00       99.00         2.5        99.0        99.0         1.5        99.0        99.0
         459           1          23           7           3           0       15.70       14.95       99.00          19          17          99         1.5         1.0        99.0         3.5         2.5        99.0         2.0         3.5        99.0         1.0         1.0        99.0         1.5         2.0        99.0         3.5         3.0        99.0    2.33    2.67   99.00    2.00    1.67   99.00         4.4        99.0        99.0         1.3        99.0        99.0        4.55       99.00       99.00         4.5         4.5        99.0         5.0         5.0        99.0
         460           1          32           8           5          99       12.25       13.25       99.00          22          22          99         1.0         1.0        99.0         2.5         2.0        99.0         2.5         1.5        99.0         1.5         2.0        99.0         2.5         1.5        99.0         3.5         2.5        99.0    2.50    1.67   99.00    2.00    1.83   99.00         3.5         2.7        99.0         3.5         3.4        99.0        3.00        2.65       99.00         4.5         4.5        99.0         2.0         2.0        99.0
         461           1          19           7           3           0       18.75       99.00       99.00          21          99          99         1.0        99.0        99.0         2.0        99.0        99.0         2.5        99.0        99.0         1.0        99.0        99.0         2.0        99.0        99.0         2.0        99.0        99.0    2.17   99.00   99.00    1.33   99.00   99.00         3.3        99.0        99.0         2.4        99.0        99.0        3.45       99.00       99.00         4.0        99.0        99.0         4.5        99.0        99.0
         462           1          27           8           4          99       20.40       20.60       20.10          18          13          10         1.5         1.0         1.0         2.0         4.0         4.0         2.5         4.0         3.0         1.5         1.0         1.0         2.0         3.0         2.5         3.5         2.0         1.0    2.17    3.67    3.17    2.17    1.33    1.00         2.7         4.2         4.1         2.4         1.7         1.7        3.15        4.25        4.20         4.0         4.0         3.5         3.5         4.0         4.5
         463           1          23           7           3           0       20.85       21.40       21.50          20          16          24         1.0         1.0         1.0         4.0         2.0         3.0         2.5         3.0         2.0         1.5         2.0         2.0         3.0         3.0         2.5         2.0         2.5         4.0    3.17    2.67    2.50    1.50    1.83    2.33         3.4         3.0         3.3         2.8         1.8         2.4        3.30        3.60        3.45         4.0         4.0         3.5         2.5         3.0         2.5
         464           1          29           8           3           0       13.75       10.90       14.35          33          27          24         2.5         1.0         1.0         1.0         2.5         3.0         2.0         2.0         1.5         3.5         2.0         2.0         1.0         1.5         2.0         4.0         4.0         4.0    1.33    2.00    2.17    3.33    2.33    2.33         2.1         2.0         2.0         3.3         3.1         3.1        2.40        2.45        2.45         4.5         4.5         4.0         2.5         2.5         2.5
         465           1          34           8           5          99       15.45       14.80       14.25          21          18          19         1.5         2.5         2.0         3.0         4.0         2.0         2.5         2.0         1.5         1.0         1.0         1.0         1.0         1.0         1.0         2.0         2.0         1.0    2.17    2.33    1.50    1.50    1.83    1.33         3.5         3.3         3.0         1.6         1.7         1.6        3.95        3.80        3.70         4.5         4.0         4.0         4.5         4.5         3.5
         466           1          28           8           6          99       16.20       99.00       99.00          29          99          99         2.0        99.0        99.0         3.5        99.0        99.0         2.5        99.0        99.0         1.0        99.0        99.0         3.5        99.0        99.0         3.0        99.0        99.0    3.17   99.00   99.00    2.00   99.00   99.00         4.3        99.0        99.0         2.0        99.0        99.0        4.15       99.00       99.00         4.0        99.0        99.0         4.0        99.0        99.0
         467           1          21           7           3           0       19.70       99.00       99.00          17          99          99         1.0        99.0        99.0         3.0        99.0        99.0         2.0        99.0        99.0         1.0        99.0        99.0         3.0        99.0        99.0         2.0        99.0        99.0    2.67   99.00   99.00    1.33   99.00   99.00         3.4        99.0        99.0         2.3        99.0        99.0        3.55       99.00       99.00         2.5         3.0        99.0         4.5         4.5        99.0
         468           1          26           8           3           0       12.15       12.00       12.70          21          23          21         1.5         1.0         1.0         3.0         4.0         2.5         3.0         1.0         2.5         1.0         1.0         1.0         2.0         1.5         2.0         3.5         2.5         3.0    2.67    2.17    2.33    2.00    1.50    1.67         3.4         3.5         3.8         2.5         3.1         3.3        3.45        3.20        3.25         3.0         4.0         4.0         3.5         3.5         2.5
         469           1          20           7           3           0       17.30       14.80       99.00          25          24          99         2.5         1.5        99.0         3.0         2.5        99.0         1.5         1.0        99.0         1.5         1.0        99.0         3.0         3.0        99.0         2.0         3.0        99.0    2.50    2.17   99.00    2.00    1.83   99.00         2.4         3.0        99.0         2.1         2.3        99.0        3.15        3.35       99.00         5.0         4.0        99.0         4.0         4.0        99.0
         470           3          31           7           7          99       20.30       20.55       20.70          17          15          14         1.0         1.5         1.5         2.5         2.0         3.0         3.0         2.5         4.0         2.5         3.0         3.0         2.5         2.5         3.0         2.0         1.5         1.5    2.67    2.33    3.33    1.83    2.00    2.00         3.4         3.5         3.6         2.0         1.6         1.8        3.70        3.95        3.90         2.5         2.5         2.0         3.5         3.5         3.5
         471           1          22           7           3           0        6.00       99.00       99.00          37          99          99         4.0        99.0        99.0         1.0        99.0        99.0         1.5        99.0        99.0         3.5        99.0        99.0         1.5        99.0        99.0         4.0        99.0        99.0    1.33   99.00   99.00    3.83   99.00   99.00         2.1        99.0        99.0         4.8        99.0        99.0        1.65       99.00       99.00         4.5         4.0         4.5         1.5         1.0         2.0
         472           1          28           8           4          99       15.65       14.05       99.00          21          24          99         2.0         3.0        99.0         1.5         2.0        99.0         2.5         2.5        99.0         2.0         2.5        99.0         1.5         2.5        99.0         3.0         3.0        99.0    1.83    2.33   99.00    2.33    2.83   99.00         2.9         2.8        99.0         2.4         2.6        99.0        3.25        3.10       99.00         3.5         2.5        99.0         3.0         3.0        99.0
         473           1          25           8           3           0       20.25       20.20       99.00          14          16          99         1.0         1.5        99.0         2.5         2.0        99.0         3.0         2.0        99.0         1.0         1.0        99.0         2.5         2.5        99.0         2.5         2.5        99.0    2.67    2.17   99.00    1.50    1.67   99.00         2.6         1.9        99.0         1.0         1.9        99.0        3.80        3.00       99.00         3.5         3.5        99.0         3.0         3.0        99.0
         474           1          20           7           2          99       12.35       11.75       13.80          34          35          36         2.5         1.5         2.0         2.0         2.0         2.5         2.0         2.0         2.0         2.0         1.5         1.0         2.0         1.5         2.0         3.0         3.0         2.0    2.00    1.83    2.17    2.50    2.00    1.67         3.4         2.4         2.7         4.1         4.1         3.9        2.65        2.15        2.40         5.0         5.0         5.0         3.0         4.0         3.0
         475           2          28           7           3           0       12.65       14.75       14.25          23          20          23         1.0         1.0         2.0         2.0         2.0         3.0         2.5         2.0         1.5         2.0         1.5         1.0         1.5         2.0         1.5         3.0         2.0         2.5    2.00    2.00    2.00    2.00    1.50    1.83         2.2         2.4         2.3         3.0         2.0         2.4        2.60        3.20        2.95         4.0         4.0         4.0         1.5         2.0         2.0
         476           1          22           7           3           1       23.90       25.05       23.85           9           6           4         1.0         1.0         1.5         3.5         3.0         4.0         2.0         3.0         2.5         1.0         1.0         1.5         3.0         3.0         3.5         1.0         2.0         1.5    2.83    3.00    3.33    1.00    1.33    1.50         3.4         3.9         3.8         1.2         1.0         1.0        4.10        4.45        4.40         2.0         1.5         2.0         4.0         4.5         4.0
         477           1          25           8           3           0       15.85       15.45       16.00          23          21          22         3.0         2.5         2.5         2.0         1.5         2.0         3.0         3.0         3.0         3.0         2.5         2.0         2.0         2.0         2.0         2.5         2.5         2.5    2.33    2.17    2.33    2.83    2.50    2.33         2.6         2.6         2.6         2.2         2.7         2.3        3.20        2.95        3.15         3.0         2.0         3.0         3.5         3.5         3.5
         478           1          28           8           3           0       14.00       15.10       99.00          29          24          99         1.0         1.0        99.0         2.0         2.5        99.0         2.0         1.0        99.0         1.5         1.0        99.0         2.0         2.5        99.0         3.5         3.0        99.0    2.00    2.00   99.00    2.00    1.67   99.00         2.8         3.8        99.0         3.7         2.3        99.0        2.55        3.75       99.00         5.0         5.0        99.0         4.0         4.5        99.0
         479           1          29           8           3           0       17.10       16.35       17.15          23          20          15         1.0         1.0         1.0         2.5         1.5         2.5         2.0         1.0         1.0         1.5         1.5         1.0         2.0         2.5         1.5         2.0         1.0         1.0    2.17    1.67    1.67    1.50    1.17    1.00         3.4         2.9         2.7         2.0         2.0         2.0        3.70        3.45        3.35         3.0         3.0         3.0         4.5         4.0         4.5
         480           1          26           7           3           0       15.75       99.00       99.00          26          99          99         2.0        99.0        99.0         2.5        99.0        99.0         1.5        99.0        99.0         1.0        99.0        99.0         3.0        99.0        99.0         2.5        99.0        99.0    2.33   99.00   99.00    1.83   99.00   99.00         3.5        99.0        99.0         2.8        99.0        99.0        3.35       99.00       99.00         4.5        99.0        99.0         3.0        99.0        99.0
         481           2          54           8           4          99       19.10       20.15       99.00           7           6          99        99.0         1.0        99.0        99.0         2.5        99.0        99.0         4.0        99.0        99.0         1.5        99.0        99.0         3.5        99.0        99.0         2.5        99.0   99.00    3.33   99.00   99.00    1.67   99.00        99.0         3.4        99.0        99.0         2.1        99.0       99.00        3.65       99.00         2.0         1.5        99.0         2.0         3.0        99.0
         482           1          26           7           3           0       23.40       99.00       99.00          26          99          99         1.5        99.0        99.0         3.5        99.0        99.0         3.0        99.0        99.0         1.0        99.0        99.0         3.0        99.0        99.0         1.5        99.0        99.0    3.17   99.00   99.00    1.33   99.00   99.00         3.7        99.0        99.0         1.8        99.0        99.0        3.95       99.00       99.00         3.5        99.0        99.0         3.5        99.0        99.0
         483           1          27           7           2          99       23.30       21.55       18.80          21          21          24         1.5         1.5         2.0         3.0         2.0         2.0         4.0         3.0         2.5         1.0         1.0         2.0         4.0         3.5         3.5         2.0         2.0         2.5    3.67    2.83    2.67    1.50    1.50    2.17         4.1         3.1         2.4         2.2         1.8         2.4        3.95        3.65        3.00         4.0         3.5         3.5         3.0         3.0         2.5
         484           1          27           9           3           0       14.65       99.00       99.00          27          99          99         2.0        99.0        99.0         1.5        99.0        99.0         2.0        99.0        99.0         2.5        99.0        99.0         1.5        99.0        99.0         3.0        99.0        99.0    1.67   99.00   99.00    2.50   99.00   99.00         2.2        99.0        99.0         2.7        99.0        99.0        2.75       99.00       99.00         4.0        99.0        99.0         2.0        99.0        99.0
         485           1          20           7           3           0       19.80       17.90       99.00          23          18          99         3.0         3.0        99.0         3.0         3.0        99.0         2.0         2.5        99.0         1.0         2.0        99.0         3.0         3.0        99.0         1.5         2.5        99.0    2.67    2.83   99.00    1.83    2.50   99.00         3.4         2.8        99.0         2.8         2.6        99.0        3.30        3.10       99.00         4.0         4.0         3.0         3.0         4.0         4.0
         486           1          29           8           3           0       15.25       99.00       99.00          25          99          99         2.0        99.0        99.0         2.5        99.0        99.0         3.0        99.0        99.0         1.5        99.0        99.0         1.0        99.0        99.0         3.0        99.0        99.0    2.17   99.00   99.00    2.17   99.00   99.00         2.6        99.0        99.0         3.3        99.0        99.0        2.65       99.00       99.00         3.0         4.0        99.0         4.0         3.5        99.0
         487           1          26           8           4          99       13.15       12.55       12.90          22          23          24         1.0         1.0         1.5         2.0         4.0         1.5         1.5         1.5         2.0         1.0         1.0         1.0         2.0         2.5         2.0         2.0         3.5         1.5    1.83    2.67    1.83    1.33    1.83    1.33         2.2         3.6         3.2         2.8         2.9         3.1        2.70        3.35        3.05         4.0         4.0         4.0         3.5         3.5         4.0
         488           1          32           8           4          99       22.70       99.00       99.00          15          99          99         1.0        99.0        99.0         3.0        99.0        99.0         2.5        99.0        99.0         1.0        99.0        99.0         2.5        99.0        99.0         1.0        99.0        99.0    2.67   99.00   99.00    1.00   99.00   99.00         3.4        99.0        99.0         1.7        99.0        99.0        3.85       99.00       99.00         3.0        99.0        99.0         3.5        99.0        99.0
         489           2          22           7           3           1       20.75       99.00       99.00          20          99          99         1.0        99.0        99.0         3.0        99.0        99.0         2.5        99.0        99.0         1.0        99.0        99.0         3.0        99.0        99.0         2.5        99.0        99.0    2.83   99.00   99.00    1.50   99.00   99.00         4.3        99.0        99.0         2.9        99.0        99.0        3.70       99.00       99.00         2.5        99.0        99.0         4.0        99.0        99.0
         490           1          20           6           3           1       12.55       11.85       13.20          30          30          29         2.0         2.5         2.0         2.0         2.0         2.0         2.0         2.0         2.0         3.0         2.5         2.0         1.5         1.5         1.5         3.0         3.0         3.0    1.83    1.83    1.83    2.67    2.67    2.33         1.6         2.0         1.9         4.2         3.8         3.8        1.70        2.10        2.05         5.0         4.5         5.0         3.0         3.0         3.5
         491           1          21           7           3          99       11.85       20.35       17.75          21          12          25         1.5         2.0         2.0         4.0         4.0         3.5         3.0         3.0         3.0         1.0         1.0         2.0         2.0         3.5         2.5         2.0         1.5         3.0    3.00    3.50    3.00    1.50    1.50    2.33         3.6         4.2         2.7         2.0         1.5         2.5        3.80        4.35        3.10         3.5         4.0         4.0         2.5         4.0         3.5
         492           1          19           7           3           1       14.10       13.35       14.70          26          26          15         1.5         1.0         1.0         3.0         2.0         3.0         2.0         1.0         2.5         1.0         1.0         1.0         3.0         1.5         2.5         2.5         2.0         2.5    2.67    1.50    2.67    1.67    1.33    1.50         2.7         2.5         2.6         2.2         1.8         1.7        3.25        3.35        3.45         5.0         4.5         5.0         3.0         3.0         3.0
         493           1          25           6           3           0       15.40       99.00       16.65          26          19          20         1.5         2.5        99.0         2.5         3.0        99.0         1.5         2.5         2.0         1.0         2.0        99.0         2.0         2.5        99.0         3.5         2.5        99.0    2.00    2.67   99.00    2.00    2.33   99.00         3.0        99.0         3.9         3.0         3.6         2.7        3.00       99.00        3.60         4.0         3.5         3.0         3.0         3.0         3.5
         494           1          21           7           3           1       15.60       16.20       15.85          23          24          23         4.0         1.5         2.5         2.0         1.5         2.0         2.0         2.5         3.0         1.5         1.5         2.5         1.5         2.5         1.5         1.5         1.5         2.0    1.83    2.17    2.17    2.33    1.50    2.33         2.6         3.1         3.0         2.3         2.5         2.2        3.15        3.30        3.40         3.5         4.0         4.0         3.0         3.0         3.5
         495           1          21           7           3           0       12.00       12.15       13.60          25          24          99         1.0         1.0        99.0         3.0         4.0        99.0         3.0         2.0        99.0         1.0         2.0        99.0         3.0         3.5        99.0         1.5         3.0        99.0    3.00    3.17   99.00    1.17    2.00   99.00         4.4         4.8        99.0         1.5         1.7        99.0        4.45        4.55       99.00         4.0         4.0         4.0         4.5         4.5         2.5
         496           1          21           7           3           1       17.60       16.75       17.40          22          22          22         1.0         1.0         1.0         2.0         2.0         2.0         2.0         2.0         2.0         1.0         1.0         1.0         1.5         2.0         2.0         2.0         2.5         2.5    1.83    2.00    2.00    1.33    1.50    1.50         2.7         2.5         2.3         2.2         1.9         2.0        3.25        3.30        3.15         5.0         4.5         4.0         4.0         4.0         3.5
         497           1          21           7           3           1       11.75       17.60       13.55          18          17          17         1.5         2.0         1.5         2.5         2.5         2.0         2.5         2.0         1.5         1.0         2.0         1.5         1.0         2.5         1.5         2.5         2.5         2.5    2.00    2.33    1.67    1.67    2.17    1.83         3.0         2.3         2.1         3.0         2.1         1.9        3.00        3.10        3.10         4.0         4.0         4.0         3.5         3.0         3.0
         498           1          20           7           3           0       18.35       17.95       18.15          29          21          26         3.0         2.5         2.5         2.0         3.0         3.0         2.5         3.5         3.0         2.0         1.5         1.5         2.0         2.5         3.0         3.5         4.0         3.5    2.17    3.00    3.00    2.83    2.67    2.50         2.6         3.3         3.3         3.3         2.5         3.1        2.65        3.40        3.10         2.5         2.0         2.5         3.5         3.0         4.0
         499           1          28          10           3           1       11.70       11.50       99.00          19          19          99         1.5         1.0        99.0         3.0         3.0        99.0         2.0         2.0        99.0         1.0         1.5        99.0         2.0         3.0        99.0         3.0         2.5        99.0    2.33    2.67   99.00    1.83    1.67   99.00         3.6         2.9        99.0         2.5         3.4        99.0        3.55        2.75       99.00         4.5         4.5         5.0         3.0         3.0         3.0
         500           1          19           7           3           1       20.25       21.35       20.75          14          10          17         1.0         1.5         1.0         2.5         3.0         3.0         2.5         3.0         2.5         1.5         1.5         1.5         3.0         3.0         3.0         1.5         1.0         2.0    2.67    3.00    2.83    1.33    1.33    1.50         3.0         3.4         3.7         1.6         1.9         1.8        3.70        3.75        3.95         2.5         2.0         2.5         3.5         3.5         3.5
         501           1          20           7           3           0       22.25       22.20       23.10          13          14          11         1.0         1.5         1.5         3.0         4.0         3.0         3.0         3.5         3.0         1.0         1.0         1.5         4.0         3.0         3.0         2.0         2.0         2.0    3.33    3.50    3.00    1.33    1.50    1.67         3.4         3.7         3.7         1.2         1.6         1.6        4.10        4.05        4.05         2.5         2.5         2.0         3.5         4.0         4.0
         502           1          30           7           3           1       20.30       18.90       16.80          22          19          18         1.0         1.5         1.0         4.0         3.0         2.5         2.0         3.0         2.5         1.5         1.0         2.0         4.0         4.0         3.5         1.5         2.5         1.0    3.33    3.33    2.83    1.33    1.67    1.33         2.9         2.5         3.2         2.1         3.2         2.4        3.40        2.65        3.40         4.0         4.5         3.5         2.5         2.5         2.0
         503           1          22           7           3           1       19.10       18.85       19.65          15          25          18         1.5         1.0         1.0         3.0         2.5         3.0         2.5         2.5         3.5         1.5         1.0         1.5         3.5         2.0         3.5         2.0         2.0         2.0    3.00    2.33    3.33    1.67    1.33    1.50         3.6         3.3         3.5         1.4         1.2         1.7        4.10        4.05        3.90         2.5         3.0         3.0         4.5         4.0         3.5
         504           1          23           7           3           1       18.70       16.85       18.50          18          27          15         1.0         1.5         1.0         2.5         2.0         2.5         2.0         3.5         2.5         1.0         1.0         2.0         2.5         3.0         2.5         1.0         1.5         3.5    2.33    2.83    2.50    1.00    1.33    2.17         2.4         2.7         1.6         1.5         2.6         2.0        3.45        3.05        2.80         3.5         4.0         4.5         3.5         3.0         3.0
         505           1          21           7           3           1       17.10       99.00       99.00          25          99          99         1.5        99.0        99.0         3.0        99.0        99.0         3.0        99.0        99.0         1.5        99.0        99.0         2.0        99.0        99.0         2.5        99.0        99.0    2.67   99.00   99.00    1.83   99.00   99.00         3.0        99.0        99.0         2.3        99.0        99.0        3.35       99.00       99.00         3.0        99.0        99.0         3.0        99.0        99.0
         506           1          26           8           3           1       21.50       18.95       17.70          26          99          21         1.0        99.0         1.0         2.5        99.0         3.5         2.5        99.0         2.5         2.0        99.0         2.0         3.0        99.0         4.0         2.0        99.0         2.0    2.67   99.00    3.33    1.67   99.00    1.67         3.1        99.0         3.7         2.4        99.0         2.2        3.35       99.00        3.75         4.0         3.5         3.0         2.5         2.5         2.0
         507           1          33           6           3           1       20.45       21.85       99.00          25          14          99         1.5         1.5        99.0         3.5         2.5        99.0         2.5         1.5        99.0         1.0         1.0        99.0         2.0         2.5        99.0         2.0         1.5        99.0    2.67    2.17   99.00    1.50    1.33   99.00         3.8         4.2        99.0         2.3         1.3        99.0        3.75        4.45       99.00         3.0         2.5        99.0         4.0         3.5        99.0
         508           1          18           7           3           1       11.15       12.55       12.35          23          25          21         1.5         1.5         1.0         1.5         2.0         1.5         2.5         3.0         3.0         1.5         1.0         2.0         2.0         2.0         1.5         4.0         3.0         3.0    2.00    2.33    2.00    2.33    1.83    2.00         2.2         2.6         2.5         3.4         2.8         2.7        2.40        2.90        2.90         5.0         4.5         4.5         3.0         3.5         3.5
         509           1          19           7           3           0       15.45       13.35       16.05          12          16          12         1.0         1.5         1.0         2.0         2.0         2.0         2.5         3.0         3.0         1.0         2.5         2.5         1.5         1.5         2.0         3.0         2.5         2.0    2.00    2.17    2.33    1.67    2.17    1.83         3.0         2.6         2.7         1.4         2.0         2.2        3.80        3.30        3.25         2.5         3.0         2.5         3.0         3.0         3.0
         510           1          27          10           3           1       17.70       17.00       18.10          21          19          26         1.5         1.0         3.0         3.0         3.0         2.5         2.5         2.0         3.0         1.5         1.0         1.0         2.0         3.0         3.0         3.5         2.5         1.5    2.50    2.67    2.83    2.17    1.50    1.83         3.2         3.7         4.1         2.3         2.6         3.1        3.45        3.55        3.50         2.0         2.5         2.5         2.5         3.0         2.5
         511           2          18           7           3           0       21.65       18.20       99.00          13          20          99         1.0         1.5        99.0         3.0         2.5        99.0         3.0         2.0        99.0         1.0         2.0        99.0         3.0         2.5        99.0         2.0         2.5        99.0    3.00    2.33   99.00    1.33    2.00   99.00         3.1         3.0        99.0         1.1         3.0        99.0        4.00        3.00       99.00         2.0         2.0        99.0         2.5         2.5        99.0
         512           1          19           7           3           1       15.30       14.15       14.75          24          25          25         4.0         1.5         2.5         2.5         3.0         2.5         2.5         3.0         2.5         2.5         2.5         2.0         2.5         3.0         2.5         3.5         4.0         2.5    2.50    3.00    2.50    3.33    2.67    2.33         3.1         3.7         3.3         1.8         3.1         3.0        3.65        3.30        3.15         4.0         4.0         4.0         3.0         3.0         3.0
         513           1          21           7           3           1       18.80       99.00       99.00          20          99          99         2.5        99.0        99.0         2.5        99.0        99.0         2.0        99.0        99.0         2.0        99.0        99.0         4.0        99.0        99.0         2.5        99.0        99.0    2.83   99.00   99.00    2.33   99.00   99.00         3.7        99.0        99.0         2.8        99.0        99.0        3.45       99.00       99.00         3.5        99.0        99.0         2.0        99.0        99.0
         514           1          23           7           3           1       16.95       21.30       99.00          20          17          99         1.0         1.0        99.0         3.5         3.0        99.0         3.0         3.0        99.0         1.0         1.0        99.0         4.0         3.0        99.0         2.5         3.0        99.0    3.50    3.00   99.00    1.50    1.67   99.00         3.7         4.0        99.0         2.1         3.0        99.0        3.80        3.50       99.00         4.0         3.5        99.0         3.0         2.5        99.0
         515           1          21           7           3           0       21.80       20.25       99.00          17          18          99         1.0         1.5        99.0         3.0         3.0        99.0         2.0         2.5        99.0         1.5         1.0        99.0         3.0         3.0        99.0         3.0         2.0        99.0    2.67    2.83   99.00    1.83    1.50   99.00         4.1         3.7        99.0         2.5         2.4        99.0        3.80        3.65       99.00         2.0         1.5        99.0         3.0         3.0        99.0
         516           1          20           7           3           1       18.55       17.15       18.45          21          23          19         2.0         3.5         3.0         2.5         3.0         2.5         2.5         3.0         3.0         1.0         2.5         1.5         2.0         1.5         2.0         3.0         4.0         2.5    2.33    2.50    2.50    2.00    3.33    2.33         2.6         3.4         2.6         1.5         3.6         1.2        3.55        2.90        3.70         3.5         3.5         3.0         4.0         4.0         4.5
         517           1          21           7           3           1       15.90       99.00       99.00          26          99          99         2.5        99.0        99.0         3.0        99.0        99.0         1.0        99.0        99.0         1.0        99.0        99.0         1.0        99.0        99.0         3.0        99.0        99.0    1.67   99.00   99.00    2.17   99.00   99.00         3.2        99.0        99.0         3.2        99.0        99.0        3.00       99.00       99.00         4.0        99.0        99.0         4.5        99.0        99.0
         518           1          21           7           3           1       20.40       99.00       99.00          16          99          99         1.5        99.0        99.0         3.0        99.0        99.0         3.5        99.0        99.0         1.5        99.0        99.0         3.5        99.0        99.0         2.0        99.0        99.0    3.33   99.00   99.00    1.67   99.00   99.00         3.3        99.0        99.0         2.1        99.0        99.0        3.60       99.00       99.00         3.0         2.0        99.0         2.5         3.0        99.0
         519           1          21           7           3           1       21.25       99.00       99.00          23          99          99         1.0        99.0        99.0         4.0        99.0        99.0         1.5        99.0        99.0         1.0        99.0        99.0         2.5        99.0        99.0         2.5        99.0        99.0    2.67   99.00   99.00    1.50   99.00   99.00         2.5        99.0        99.0         1.5        99.0        99.0        3.50       99.00       99.00         3.5        99.0        99.0         4.5        99.0        99.0
         520           2          32           6           3           0       16.85       99.00       99.00          30          99          99         1.0        99.0        99.0         4.0        99.0        99.0         1.5        99.0        99.0         1.5        99.0        99.0         3.0        99.0        99.0         3.5        99.0        99.0    2.83   99.00   99.00    2.00   99.00   99.00         3.2        99.0        99.0         2.8        99.0        99.0        3.20       99.00       99.00         3.0        99.0        99.0         3.0        99.0        99.0
         521           2          29           8           3           0       11.15       13.45       99.00          14          26          99         1.0         1.0        99.0         2.0         3.0        99.0         3.0         2.0        99.0         2.0         1.5        99.0         2.0         1.0        99.0         3.5         3.0        99.0    2.33    2.00   99.00    2.17    1.83   99.00         1.8         1.6        99.0         2.8         3.2        99.0        2.50        2.20       99.00         3.0         4.0         4.5         2.5         3.0         3.0
         522           1          18           7           3           1       25.70       24.75       22.90          11          17          10         1.0         1.0         1.0         3.5         2.0         3.5         3.0         2.0         2.5         1.0         1.0         1.5         4.0         2.5         3.5         1.0         1.0         2.0    3.50    2.17    3.17    1.00    1.00    1.50         4.3         3.7         4.1         1.1         1.2         1.4        4.60        4.25        4.35         2.0         2.0         2.0         4.0         3.5         3.5
         523           1          61           7           4          99       18.25       22.05       20.50          17          21          18         1.0         1.0         1.0         2.5         2.5         2.5         2.5         3.5         2.0         2.5         1.5         2.0         2.5         3.0         2.0         1.0         1.0         1.0    2.50    3.00    2.17    1.50    1.17    1.33         3.2         3.1         3.0         1.9         2.0         2.2        3.65        3.55        3.40         4.0         4.0         4.5         4.0         4.5         4.5
         524           1          22           7           3           0       16.35       15.50       16.10          21          19          99         2.5         1.5        99.0         2.0         2.0        99.0         2.5         2.5        99.0         2.5         2.0        99.0         2.5         2.0        99.0         2.0         2.5        99.0    2.33    2.17   99.00    2.33    2.00   99.00         3.0         2.5        99.0         2.1         2.1        99.0        3.45        3.20       99.00         4.5         4.5         4.0         4.0         4.0         4.0
         525           2          28           6           3           0       17.30       22.35       20.05          20          11          14         1.5         1.0         1.0         2.0         3.0         2.0         1.5         1.0         2.0         2.0         1.0         1.5         2.5         4.0         3.0         3.0         2.0         2.0    2.00    2.67    2.33    2.17    1.33    1.50         3.7         4.3         3.5         2.5         2.1         2.4        3.60        4.10        3.55         2.5         3.0         2.0         2.5         2.5         2.0
         526           2          30           6           4          99       19.55       19.85       99.00          14           8          99         1.0         1.0        99.0         4.0         4.0        99.0         2.5         2.0        99.0         1.0         1.0        99.0         4.0         4.0        99.0         2.5         2.5        99.0    3.50    3.33   99.00    1.50    1.50   99.00         3.5         3.5        99.0         2.2         2.3        99.0        3.65        3.60       99.00         1.5         2.5        99.0         5.0         5.0        99.0
         527           1          24           7           3           0       20.30       23.35       23.00          25          23          23         1.0         1.0         1.0         2.0         2.0         1.5         2.0         2.0         2.5         1.0         2.0         2.5         2.0         3.5         2.0         3.5         2.0         2.0    2.00    2.50    2.00    1.83    1.67    1.83         2.7         2.3         2.0         3.0         2.8         2.2        2.85        2.75        2.90         4.5         4.0         4.5         3.0         3.0         3.0
         528           1          68           4           9           0       16.55       18.25       17.30          16          21          17         1.5         2.0         1.5         2.0         2.5         2.5         3.0         2.5         2.5         3.0         3.0         2.5         2.5         2.0         2.0         2.5         2.0         2.0    2.50    2.33    2.33    2.33    2.33    2.00         3.4         3.0         3.0         3.1         2.6         2.7        3.15        3.20        3.15         4.0         4.0         4.5         4.0         4.0         4.5
         529           2          25           8           3           0       24.10       22.60       99.00          25          99          99         1.0        99.0        99.0         3.0        99.0        99.0         2.5        99.0        99.0         1.0        99.0        99.0         2.0        99.0        99.0         2.5        99.0        99.0    2.50   99.00   99.00    1.50   99.00   99.00         4.0        99.0        99.0         2.1        99.0        99.0        3.95       99.00       99.00         2.5         2.0        99.0         2.5         2.0        99.0
         530           2          73           7           9          99       19.85       99.00       19.75          14          99          16         1.5        99.0         2.0         2.5        99.0         3.0         2.5        99.0         3.0         1.0        99.0         2.0         2.0        99.0         1.5         2.0        99.0         2.5    2.33   99.00    2.50    1.50   99.00    2.17         3.9        99.0         3.9         2.0        99.0         2.4        3.95       99.00        3.75         3.0        99.0         3.5         4.5        99.0         4.0
         531           1          30           8           3           0       21.55       20.75       22.30          27          17          23         2.5         2.5         2.0         3.0         3.0         3.0         3.0         2.0         2.0         2.0         2.0         1.0         3.0         3.0         2.5         2.5         2.5         2.0    3.00    2.67    2.50    2.33    2.33    1.67         3.2         3.4         3.3         2.6         1.7         2.0        3.30        3.85        3.65         2.0         2.0         2.0         4.0         4.0         3.5
         532           1          34           7           3           0       15.25       14.40       12.75          26          27          27         1.0         1.0         1.0         2.5         1.5         2.0         1.5         2.5         2.5         1.5         1.5         1.5         2.0         2.0         2.0         2.5         2.0         3.0    2.00    2.00    2.17    1.67    1.50    1.83         2.7         1.5         2.0         2.2         2.6         2.6        3.25        2.45        2.70         4.0         4.0         4.5         3.5         3.0         3.0
         533           1          22           7           3           0       12.50       99.00       99.00          29          99          99         1.5        99.0        99.0         2.5        99.0        99.0         1.0        99.0        99.0         1.0        99.0        99.0         1.5        99.0        99.0         3.5        99.0        99.0    1.67   99.00   99.00    2.00   99.00   99.00         3.4        99.0        99.0         3.2        99.0        99.0        3.10       99.00       99.00         3.5        99.0        99.0         2.5        99.0        99.0
         534           1          44           8           5          99       14.65       15.00       14.85          16          20          17         1.0         1.0         1.0         2.0         2.0         2.0         3.0         3.0         3.0         1.5         1.5         2.5         2.0         2.0         2.0         3.0         2.5         2.5    2.33    2.33    2.33    1.83    1.67    2.00         2.8         3.1         3.0         2.2         2.2         2.1        3.30        3.45        3.45         4.0         3.0         4.0         2.5         3.0         3.0
         535           1          25           7           3           0       14.55       99.00       99.00          27          99          99         1.5        99.0        99.0         2.0        99.0        99.0         2.0        99.0        99.0         2.5        99.0        99.0         1.5        99.0        99.0         3.5        99.0        99.0    1.83   99.00   99.00    2.50   99.00   99.00         2.5        99.0        99.0         2.6        99.0        99.0        2.95       99.00       99.00         3.0         3.5        99.0         2.0         2.5        99.0
         536           1          28           8           2          99       21.30       20.40       22.60          13          15          17         1.0         1.5         1.0         3.0         3.0         2.0         3.5         3.0         3.5         1.0         1.0         1.5         2.0         2.5         2.5         1.0         1.0         1.5    2.83    2.83    2.67    1.00    1.17    1.33         4.7         2.6         3.5         4.1         1.3         1.8        3.30        3.65        3.85         3.5         2.5         4.5         4.5         4.5         4.5
         537           1          19           7           3           1       16.80       17.25       15.35          24          25          18         2.0         1.0         2.5         3.0         3.0         3.0         2.5         2.5         2.0         1.0         1.0         1.5         2.5         2.5         3.0         2.5         3.0         2.5    2.67    2.67    2.67    1.83    1.67    2.17         3.2         3.0         3.2         3.1         2.4         3.2        3.05        3.30        3.00         4.5         4.5         4.5         4.0         3.5         4.0
         538           1          24           6           3           1       22.05       22.65       21.85          17          23          11         1.0         1.0         1.0         1.0         3.5         3.0         3.5         4.0         3.0         3.0         1.0         1.0         1.5         3.0         1.5         1.0         2.0         1.0    2.00    3.50    2.50    1.67    1.33    1.00         2.4         2.4         2.4         1.1         1.3         1.1        3.65        3.55        3.65         4.0         4.0         4.0         3.5         3.5         4.0
         539           1          37           8           3           1       14.85       99.00       99.00          20          99          99         1.0        99.0        99.0         2.0        99.0        99.0         2.0        99.0        99.0         1.5        99.0        99.0         2.0        99.0        99.0         2.5        99.0        99.0    2.00   99.00   99.00    1.67   99.00   99.00         3.2        99.0        99.0         2.2        99.0        99.0        3.50       99.00       99.00         4.0        99.0        99.0         4.0        99.0        99.0
         540           1          30           8           4          99       16.50       99.00       99.00          22          99          99         1.0        99.0        99.0         2.5        99.0        99.0         3.0        99.0        99.0         1.0        99.0        99.0         2.5        99.0        99.0         2.0        99.0        99.0    2.67   99.00   99.00    1.33   99.00   99.00         3.0        99.0        99.0         1.7        99.0        99.0        3.65       99.00       99.00         4.0        99.0        99.0         4.0        99.0        99.0
         541           2          48           8           4          99       21.90       23.20       99.00           9           6          99         1.0         1.0        99.0         2.5         4.0        99.0         3.5         2.5        99.0         1.0         1.0        99.0         3.0         3.5        99.0         1.5         2.0        99.0    3.00    3.33   99.00    1.17    1.33   99.00         4.2         4.1        99.0         1.1         1.1        99.0        4.55        4.50       99.00         1.0         1.0        99.0         4.5         4.5        99.0
         542           1          24           8           3           0       19.50       22.25       19.15          25          19           9         1.0         1.0         1.0         3.5         4.0         4.0         3.5         2.5         1.5         1.0         1.0         1.5         4.0         4.0         4.0         3.0         1.5         1.5    3.67    3.50    3.17    1.67    1.17    1.33         3.9         4.6         4.4         2.7         2.0         1.7        3.60        4.30        4.35         3.5         3.0         2.0         3.5         4.0         4.5
         543           2          34           4           1          99       14.05       99.00       99.00          26          99          99         1.5        99.0        99.0         2.5        99.0        99.0         2.0        99.0        99.0         1.5        99.0        99.0         2.5        99.0        99.0         2.0        99.0        99.0    2.33   99.00   99.00    1.67   99.00   99.00         3.7        99.0        99.0         2.4        99.0        99.0        3.65       99.00       99.00         5.0        99.0        99.0         3.0        99.0        99.0
         544           1          33           9           3           0       12.85       13.15       99.00          28          29          99         2.0         2.0        99.0         4.0         4.0        99.0         1.0         2.0        99.0         1.0         1.0        99.0         3.5         4.0        99.0         2.5         3.5        99.0    2.83    3.33   99.00    1.83    2.17   99.00         3.0         3.0        99.0         4.2         3.7        99.0        2.40        2.65       99.00         4.5         5.0        99.0         5.0         5.0        99.0
         545           1          27           7           3           0       14.00       12.65       12.35          26          26          25         2.0         1.0         1.0         3.5         2.5         3.5         1.5         2.5         2.0         1.0         1.5         1.0         3.5         2.5         2.0         3.5         4.0         2.5    2.83    2.50    2.50    2.17    2.17    1.50         3.6         2.8         3.3         4.0         3.1         4.2        2.80        2.85        2.55         4.5         5.0         5.0         3.0         4.0         3.5
         546           1          32           8           7          99       13.40       16.10       99.00          23          29          99         1.0         1.0        99.0         4.0         3.0        99.0         3.0         2.0        99.0         1.0         1.0        99.0         3.5         3.0        99.0         3.0         2.5        99.0    3.50    2.67   99.00    1.67    1.50   99.00         3.5         3.6        99.0         2.5         2.7        99.0        3.50        3.45       99.00         4.5         4.5        99.0         2.0         3.0        99.0
         547           2          52           6           6          99       21.55       23.30       21.25          12          10          12         1.0         1.0         1.0         3.0         4.0         3.5         1.5         1.5         2.0         1.0         1.0         1.0         3.0         3.0         3.0         1.5         1.5         2.0    2.50    2.83    2.83    1.17    1.17    1.33         3.6         3.4         3.0         1.8         1.2         1.7        3.90        4.10        3.65         2.0         2.0         2.0         4.0         3.5         3.5
         548           1          25           8           3           0       21.50       22.50       99.00          13          21          99         1.0         1.5        99.0         3.0         3.0        99.0         2.0         3.0        99.0         1.0         1.5        99.0         3.0         4.0        99.0         2.0         1.5        99.0    2.67    3.33   99.00    1.33    1.50   99.00         2.8         2.5        99.0         1.5         1.4        99.0        3.65        3.55       99.00         3.5         3.5        99.0         1.5         1.5        99.0
         549           1          28           8           7          99       11.60       11.65       99.00          15          14          99         2.0         1.5        99.0         3.5         3.5        99.0         2.5         2.5        99.0         1.5         1.0        99.0         2.0         3.0        99.0         3.5         3.0        99.0    2.67    3.00   99.00    2.33    1.83   99.00         3.4         3.8        99.0         2.8         2.3        99.0        3.30        3.75       99.00         5.0         4.5        99.0         4.5         4.5        99.0
         550           1          26           7           3           0       16.85       17.30       99.00          28          19          99         1.0         1.0        99.0         2.5         4.0        99.0         2.0         2.0        99.0         1.5         1.0        99.0         1.5         3.5        99.0         4.0         3.5        99.0    2.00    3.17   99.00    2.17    1.83   99.00         2.2         3.8        99.0         3.9         3.1        99.0        2.15        3.35       99.00         3.0         3.5        99.0         2.0         2.5        99.0
         551           1          22           7           3           0       20.55       99.00       99.00          20          99          99         1.0        99.0        99.0         3.5        99.0        99.0         3.0        99.0        99.0         1.0        99.0        99.0         3.5        99.0        99.0         2.0        99.0        99.0    3.33   99.00   99.00    1.33   99.00   99.00         3.9        99.0        99.0         2.7        99.0        99.0        3.60       99.00       99.00         2.5         3.5        99.0         3.0         3.0        99.0
         552           3          36          10           5          99       18.45       18.80       16.20          26          26          25         1.0         1.5         1.0         2.0         3.0         2.5         2.5         2.0         1.0         1.5         1.0         1.0         3.0         3.5         2.5         2.5         2.0         2.5    2.50    2.83    2.00    1.67    1.50    1.50         3.7         3.5         3.4         2.8         2.6         3.6        3.45        3.45        2.90         2.5         3.5         4.0         3.5         4.0         3.0
         553           1          29           8           3           0       20.05       18.00       19.10          15          17          14         1.0         1.0         1.0         3.5         2.0         3.0         3.5         2.0         2.0         1.0         1.0         1.0         2.0         1.5         2.0         2.0         2.0         2.0    3.00    1.83    2.33    1.33    1.33    1.33         3.6         2.9         3.0         1.7         1.4         1.3        3.95        3.75        3.85         4.0         4.5         4.0         5.0         4.5         4.0
         554           1          20           7           3           0       16.60       15.30       16.40          28          25          21         1.0         1.5         1.5         2.0         2.0         2.5         2.5         2.5         3.0         1.5         1.5         1.5         2.5         3.5         3.5         3.0         3.0         2.5    2.33    2.67    3.00    1.83    2.00    1.83         2.0         2.4         3.0         3.6         3.4         3.1        2.20        2.50        2.95         4.5         4.0         3.5         3.0         2.5         3.0
         555           2          28           8           3           0       15.80       12.20       12.05           6          11           9         1.0         1.0         2.0         2.0         3.0         2.0         1.5         2.0         3.0         1.0         1.5         1.0         3.0         3.0         2.5         3.0         4.0         3.0    2.17    2.67    2.50    1.67    2.17    2.00         3.0         2.4         3.0         1.8         2.1         1.8        3.60        3.15        3.60         3.0         3.0         3.0         3.0         3.0         3.0
         556           1          23           7           3           0       21.15       21.20       20.70          17          19          24         1.5         1.0         1.0         2.0         2.0         2.0         2.5         3.5         3.0         1.0         1.0         1.5         2.0         2.5         2.5         2.0         1.5         2.0    2.17    2.67    2.50    1.50    1.17    1.50         4.0         4.0         3.8         1.4         1.5         1.5        4.30        4.25        4.15         2.0         1.5         2.0         2.5         3.0         3.0
         557           1          23           8           3           0       14.70       99.00       99.00          13          99          99         1.5        99.0        99.0         3.0        99.0        99.0         1.5        99.0        99.0         1.0        99.0        99.0         1.0        99.0        99.0         2.0        99.0        99.0    1.83   99.00   99.00    1.50   99.00   99.00         3.2        99.0        99.0         1.8        99.0        99.0        3.70       99.00       99.00         3.0        99.0        99.0         3.5        99.0        99.0
         558           1          28           7           3           1       16.30       99.00       99.00          21          99          99         1.0        99.0        99.0         3.0        99.0        99.0         3.0        99.0        99.0         1.0        99.0        99.0         3.0        99.0        99.0         2.5        99.0        99.0    3.00   99.00   99.00    1.50   99.00   99.00         3.4        99.0        99.0         2.2        99.0        99.0        3.60       99.00       99.00         3.0        99.0        99.0         3.0        99.0        99.0
         559           1          23           7           3           0       17.95       20.75       20.15          18          20          17         3.0         1.0         2.5         2.5         3.0         2.5         2.0         3.5         2.0         1.5         1.5         1.5         3.0         4.0         4.0         2.5         2.0         3.5    2.50    3.50    2.83    2.33    1.50    2.50         2.6         4.2         3.2         2.8         1.8         3.0        2.90        4.20        3.10         4.0         3.5         3.0         3.0         3.0         3.0
         560           1          36           6           3           1       20.60       21.50       21.15          12          11          18         1.0         1.5         1.5         3.0         3.0         2.5         4.0         4.0         3.5         2.0         1.5         1.0         2.0         3.0         3.0         1.0         1.5         1.0    3.00    3.33    3.00    1.33    1.50    1.17         3.7         3.7         2.9         1.8         1.5         1.9        3.95        4.10        3.50         2.0         2.5         3.0         4.5         4.0         4.0
         561           1          57           8           3           0       19.00       18.05       19.65          18          16          17         1.5         1.0         1.5         3.0         3.0         2.5         2.0         3.0         2.0         1.0         1.5         1.5         2.0         1.5         1.5         1.0         1.5         2.0    2.33    2.50    2.00    1.17    1.33    1.67         2.4         2.6         2.5         1.8         1.5         1.4        3.30        3.55        3.55         4.5         4.0         4.0         3.5         3.0         3.0
         562           1          20           7           3           0       14.25       19.40       15.70          23          11          15         1.0         1.0         1.0         3.0         3.0         3.0         3.0         3.0         3.0         1.0         1.0         1.0         2.0         2.5         2.5         2.0         2.0         3.0    2.67    2.83    2.83    1.33    1.33    1.67         3.1         3.4         3.2         2.1         1.0         2.1        3.50        4.20        3.55         3.0         3.5         4.5         3.0         3.0         3.0
         563           1          20           7           3           0       19.75       20.50       99.00          16           5          99         1.5         1.5        99.0         2.5         3.0        99.0         3.0         3.5        99.0         1.0         1.5        99.0         3.0         2.5        99.0         1.5         2.5        99.0    2.83    3.00   99.00    1.33    1.83   99.00         3.8         4.1        99.0         1.6         1.4        99.0        4.10        4.35       99.00         5.0         3.5        99.0         4.5         4.5        99.0
         564           1          21           7           3           0       18.70       18.40       20.55          16          20          15         1.0         1.0         1.5         4.0         3.5         4.0         3.0         2.0         1.0         1.0         1.0         1.0         3.0         1.0         1.0         3.0         2.0         2.0    3.33    2.17    2.00    1.67    1.33    1.50         3.5         3.2         4.4         1.5         1.8         1.4        4.00        3.70        4.50         3.0         4.0         4.0         4.5         4.5         5.0
         565           1          30           7           3           0       22.15       22.50       23.55          15          12           6         1.0         1.0         1.0         2.0         4.0         3.0         3.0         1.0         2.5         1.0         1.0         1.0         3.5         4.0         3.5         2.0         2.0         2.0    2.83    3.00    3.00    1.33    1.33    1.33         3.1         4.1         3.7         1.6         1.3         1.4        3.75        4.40        4.15         3.5         2.5         2.0         3.0         3.5         3.0
         566           1          27           7           3           1       21.30       22.20       23.30          12          12           9         1.5         1.0         2.5         3.5         3.0         3.5         2.5         3.0         2.5         1.0         1.0         1.5         4.0         3.5         3.5         3.5         1.5         3.0    3.33    3.17    3.17    2.00    1.17    2.33         3.7         3.6         3.5         2.7         2.1         1.8        3.50        3.75        3.85         3.5         3.5         2.0         4.0         4.5         4.5
         567           1          19           7           3           0       15.85       14.50       99.00          14          11          99         1.5         1.5        99.0         2.0         2.5        99.0         3.0         3.0        99.0         2.0         2.5        99.0         1.5         1.5        99.0         2.5         2.0        99.0    2.17    2.33   99.00    2.00    2.00   99.00         2.7         3.0        99.0         1.6         1.9        99.0        3.55        3.55       99.00         2.5         4.0        99.0         3.0         3.5        99.0
         568           1          30           7           3           0       16.70       20.45       18.05          22          17          22         1.0         1.0         1.0         2.0         2.5         3.5         2.0         2.5         2.0         1.0         1.0         1.0         2.5         3.0         1.5         1.5         1.0         1.0    2.17    2.67    2.33    1.17    1.00    1.00         2.9         2.7         2.9         1.2         1.2         1.3        3.85        3.75        3.80         2.0         3.0         2.0         4.5         5.0         5.0
         569           1          21           7           3           1       12.80       16.35       13.80          23          15          18         1.5         1.0         1.0         1.5         2.0         2.5         2.5         2.0         2.5         2.5         2.5         1.0         1.5         2.0         2.0         3.5         2.5         2.0    1.83    2.00    2.33    2.50    2.00    1.33         3.3         3.5         3.0         2.1         1.9         1.8        3.60        3.80        3.60         3.0         3.5         2.5         5.0         3.5         5.0
         570           1          25           7           3           1       15.70       99.00       99.00          22          99          99         1.0        99.0        99.0         2.5        99.0        99.0         1.0        99.0        99.0         1.0        99.0        99.0         1.5        99.0        99.0         2.0        99.0        99.0    1.67   99.00   99.00    1.33   99.00   99.00         2.9        99.0        99.0         2.9        99.0        99.0        3.00       99.00       99.00         4.0        99.0        99.0         4.0        99.0        99.0
         571           1          20           7           3           1       25.50       21.90       99.00          12          17          99         1.0         3.0        99.0         3.5         2.5        99.0         1.5         3.0        99.0         1.0         2.0        99.0         4.0         3.0        99.0         2.0         2.0        99.0    3.00    2.83   99.00    1.33    2.33   99.00         4.6         4.0        99.0         1.1         1.6        99.0        4.75        4.20       99.00         1.0         1.5        99.0         3.0         1.5        99.0
         572           1          19           7           3           1       22.85       24.55       24.30           7           9           7         1.5         1.0         1.0         3.5         3.0         3.5         2.5         2.0         2.0         1.0         1.0         1.0         4.0         4.0         3.0         2.0         1.5         1.0    3.33    3.00    2.83    1.50    1.17    1.00         3.8         3.6         3.7         1.1         1.2         1.1        4.35        4.20        4.30         2.5         2.5         2.0         4.0         3.0         4.5
         573           2          27           9           3           0       14.90       15.25       99.00          20          24          99         1.0         1.5        99.0         3.0         3.0        99.0         2.0         1.0        99.0         1.0         1.0        99.0         2.0         2.0        99.0         3.0         2.0        99.0    2.33    2.00   99.00    1.67    1.50   99.00         4.1         3.5        99.0         2.6         3.0        99.0        3.75        3.25       99.00         4.5         4.0        99.0         4.5         4.0        99.0
         574           1          22           7           3           0       10.40        9.75        9.05          28          30          26         2.0         3.5         3.0         2.5         1.0         2.0         1.5         1.0         1.5         1.0         1.5         1.0         2.0         1.0         1.0         4.0         4.0         3.5    2.00    1.00    1.50    2.33    3.00    2.50         2.6         1.4         2.5         3.9         3.9         3.9        2.35        1.75        2.30         4.0         4.5         4.0         3.0         3.0         3.0
         575           1          19           7           3           1       19.80       19.10       17.40          13          15          11         1.5         1.5         1.5         2.0         2.5         2.5         3.0         2.5         1.5         1.0         1.5         2.0         1.0         1.5         1.5         2.0         2.5         1.5    2.00    2.17    1.83    1.50    1.83    1.67         3.3         3.2         3.4         4.1         1.3         1.6        2.60        3.95        3.90         3.0         3.0         3.5         4.5         4.5         5.0
         576           1          19           7           3           0       16.60       99.00       99.00          26          99          99         3.5        99.0        99.0         2.5        99.0        99.0         2.0        99.0        99.0         3.0        99.0        99.0         2.5        99.0        99.0         3.0        99.0        99.0    2.33   99.00   99.00    3.17   99.00   99.00         3.9        99.0        99.0         4.7        99.0        99.0        2.60       99.00       99.00         4.5        99.0        99.0         3.5        99.0        99.0
         577           2          27           7           3           0       26.55       27.30       26.40           8           7          10         1.0         1.5         1.0         3.5         4.0         3.0         4.0         4.0         4.0         2.0         2.0         2.0         4.0         4.0         4.0         1.0        99.0         1.5    3.83    4.00    3.67    1.33   99.00    1.50         4.8         4.7         4.3         1.4         1.7         1.7        4.70        4.50        4.30         1.0         1.0         1.5         3.5         3.5         4.0
         578           1          23           8           3           0       12.60       10.70       10.70          12          18          10         1.0         1.0         1.0         2.0         2.0         1.5         2.0         1.5         2.0         1.5         1.0         1.5         1.5         1.5         1.5         3.0         2.0         1.0    1.83    1.67    1.67    1.83    1.33    1.17         2.8         2.6         3.1         2.6         2.3         1.6        3.10        3.15        3.75         4.5         4.5         4.0         4.0         3.5         4.0
         579           1          27           8           3           0       21.05       20.10       22.85          21          18           3         1.0         1.0         1.0         3.0         4.0         3.5         3.5         4.0         3.5         1.0         1.5         1.0         2.0         2.5         3.0         1.5         1.0         1.5    2.83    3.50    3.33    1.17    1.17    1.17         3.0         4.2         4.5         2.0         1.2         1.1        3.50        4.50        4.70         2.0         2.0         2.5         4.0         4.0         4.5
         580           1          20           7           3           0       12.65       14.20       12.60          23          26          26         1.0         1.5         2.0         2.0         2.5         2.0         1.0         2.0         3.0         1.5         2.0         3.0         2.0         1.0         2.5         3.0         3.5         3.5    1.67    1.83    2.50    1.83    2.33    2.83         2.2         2.4         2.8         3.0         3.1         3.4        2.60        2.65        2.70         4.5         5.0         4.5         3.5         3.0         3.0
         581           1          38           8           3           0       19.35       14.40       15.50          15          31          31         1.0         1.5         3.0         3.0         1.0         1.5         3.0         1.5         1.0         3.0         4.0         3.5         3.0         1.5         1.5         3.0         3.5         3.5    3.00    1.33    1.33    2.33    3.00    3.33         3.8         1.9         2.2         2.1         4.3         2.9        3.85        1.80        2.65         3.5         4.0         3.5         3.5         2.5         2.5
         582           1          28           8           3           0       18.25       15.75       14.10          24          30          27         1.0         2.5         1.0         2.5         2.5         2.5         1.5         2.0         2.0         1.0         2.0         1.5         2.0         2.0         2.0         2.5         3.0         3.0    2.00    2.17    2.17    1.50    2.50    1.83         2.1         2.4         2.1         2.2         3.4         1.8        2.95        2.50        3.15         3.5         3.5         4.5         3.5         3.5         4.0
         583           2          20           7           3           0       16.95       18.65       16.15          13          16          12         1.0         1.0         1.0         3.5         2.5         2.5         1.5         1.5         2.0         1.0         1.0         1.0         2.5         1.5         3.0         4.0         4.0         3.0    2.50    1.83    2.50    2.00    2.00    1.67         3.2         3.0         3.3         2.1         1.9         1.8        3.55        3.55        3.75         2.0         2.0         2.0         3.5         3.5         3.0
         584           1          27           8           6          99       16.50       15.10       14.95          23          20          24         1.0         1.0         1.5         3.0         2.5         3.0         1.5         3.0         3.0         2.0         1.5         1.5         2.0         2.5         2.0         3.5         2.5         3.0    2.17    2.67    2.67    2.17    1.67    2.00         3.0         3.5         2.5         1.9         1.9         2.7        3.55        3.80        2.90         3.0         3.0         3.0         3.0         2.5         3.0
         585           1          23           8           3           1       21.05       99.00       20.40          26          99          23         2.0        99.0         1.5         2.5        99.0         4.0         2.5        99.0         2.0         2.0        99.0         1.0         3.0        99.0         2.5         1.0        99.0         1.0    2.67   99.00    2.83    1.67   99.00    1.17         4.4        99.0         4.1         2.7        99.0         2.1        3.85       99.00        4.00         5.0        99.0         5.0         4.5        99.0         4.5
         586           1          62           7           5          99       25.65       23.35       27.10          15           8           6         1.0         1.5         1.0         4.0         4.0         4.0         4.0         3.0         4.0         1.0         1.0         1.0         4.0         4.0         4.0         2.0         2.0         1.5    4.00    3.67    4.00    1.33    1.50    1.17         3.9         3.8         4.2         1.4         1.7         1.5        4.25        4.05        4.35         3.0         2.0         2.0         4.5         4.0         4.5
         587           1          27           8           6          99       17.35       18.30       19.65          22          22          25         1.0         2.0         1.5         3.0         2.5         3.0         2.0         2.0         2.5         1.0         1.0         1.5         2.5         2.0         3.0         2.5         3.0         2.5    2.50    2.17    2.83    1.50    2.00    1.83         3.5         3.2         3.4         2.8         2.8         2.5        3.35        3.20        3.45         4.0         4.0         4.0         4.5         4.5         4.5
         588           1          22           7           3           1       21.50       20.30       19.15          19          27          20         1.0         1.0        99.0         3.0         2.5        99.0         3.5         4.0        99.0         2.0         2.5        99.0         3.5         2.5        99.0         2.5         3.5        99.0    3.33    3.00   99.00    1.83    2.33   99.00         3.4         3.1        99.0         2.2         2.5        99.0        3.60        3.30       99.00         1.5         3.0         3.0         2.0         2.0         2.0
         589           2          22           7           3           0       13.40       13.85       99.00          22          18          99         3.0         2.0        99.0         2.5         3.0        99.0         3.0         2.5        99.0         1.5         1.5        99.0         3.5         2.5        99.0         3.0         2.0        99.0    3.00    2.67   99.00    2.50    1.83   99.00         3.5         4.4        99.0         2.1         1.5        99.0        3.70        4.45       99.00         2.5         3.5        99.0         2.5         3.0        99.0
         590           1          24           6           3           1       15.05       15.45       16.65          26          19          22         1.5         1.5         1.5         3.0         3.0         2.5         2.5         2.5         2.0         1.0         2.0         1.5         3.0         2.5         2.0         3.0         2.0         2.0    2.83    2.67    2.17    1.83    1.83    1.67         3.6         3.8         4.0         1.3         1.1         1.5        4.15        4.35        4.25         3.0         3.0         3.0         4.0         4.5         3.0
         591           2          20           6           3           1       12.85       99.00       99.00          23          99          99         1.5        99.0        99.0         1.5        99.0        99.0         2.5        99.0        99.0         2.5        99.0        99.0         1.0        99.0        99.0         2.0        99.0        99.0    1.67   99.00   99.00    2.00   99.00   99.00         1.4        99.0        99.0         3.2        99.0        99.0        2.10       99.00       99.00         4.0        99.0        99.0         3.0        99.0        99.0
         592           1          28           8           4          99       22.40       21.80       22.50          13          14           9         1.0         1.0         1.0         3.0         2.0         2.5         2.0         1.0         3.0         1.0         1.0         1.0         2.5         2.0         3.0         2.0         1.5         2.0    2.50    1.67    2.83    1.33    1.17    1.33         4.2         4.2         4.4         2.0         1.7         2.0        4.10        4.25        4.20         4.0         4.0         4.0         2.5         2.5         3.0
         593           1          23           6           3           1       22.95       99.00       99.00          14          99          99         1.0        99.0        99.0         3.0        99.0        99.0         2.0        99.0        99.0         1.5        99.0        99.0         3.5        99.0        99.0         1.0        99.0        99.0    2.83   99.00   99.00    1.17   99.00   99.00         4.0        99.0        99.0         1.0        99.0        99.0        4.50       99.00       99.00         1.0        99.0        99.0         3.5        99.0        99.0
         594           2          64           7           4          99       16.35       19.95       99.00          21          20          99         1.0         1.0        99.0         2.0         2.0        99.0         2.5         2.0        99.0         1.5         1.0        99.0         3.0         3.0        99.0         3.5         2.0        99.0    2.50    2.33   99.00    2.00    1.33   99.00         2.6         2.2        99.0         2.8         2.0        99.0        2.90        3.10       99.00         2.5         4.0        99.0         3.0         3.0        99.0
         595           1          24          10           3           0       15.40       99.00       99.00          24          99          99         2.0        99.0        99.0         2.0        99.0        99.0         2.0        99.0        99.0         1.5        99.0        99.0         2.0        99.0        99.0         2.0        99.0        99.0    2.00   99.00   99.00    1.83   99.00   99.00         3.0        99.0        99.0         3.1        99.0        99.0        2.95       99.00       99.00         2.5        99.0        99.0         3.5        99.0        99.0
         596           1          53           9           4          99       12.95       12.30       11.85          21          27          24         2.0         1.5         1.5         2.0         2.0         1.5         2.5         2.5         3.0         1.5         1.5         1.5         1.5         1.5         2.0         3.0         4.0         3.0    2.00    2.00    2.17    2.17    2.33    2.00         2.3         2.2         1.9         3.1         2.7         2.7        2.60        2.75        2.60         4.5         4.5         5.0         3.5         3.5         2.5
         597           1          24           8           3           0       21.45       99.00       99.00          18          99          99         2.0        99.0        99.0         3.0        99.0        99.0         2.5        99.0        99.0         1.5        99.0        99.0         3.0        99.0        99.0         2.0        99.0        99.0    2.83   99.00   99.00    1.83   99.00   99.00         3.2        99.0        99.0         2.6        99.0        99.0        3.30       99.00       99.00         2.0        99.0        99.0         3.5        99.0        99.0
         598           1          35           9           1          99       14.05       18.15       15.85          14          16          18         1.5         1.5         1.0         3.0         3.0         3.0         2.0         2.5         1.5         1.0         1.5         1.0         2.0         2.0         1.5         3.5         3.5         3.5    2.33    2.50    2.00    2.00    2.17    1.83         2.9         3.0         3.2         2.9         2.2         2.3        3.00        3.40        3.45         2.5         4.5         4.0         4.0         4.0         4.0
         599           1          20           7           3           1       22.15       23.55       21.40          12          14          16         1.0         1.5         1.0         3.0         3.0         3.0         1.5         2.0         1.5         1.0         1.0         1.0         3.0         3.0         3.5         2.0         2.0         2.0    2.50    2.67    2.67    1.33    1.50    1.33         3.4         4.2         3.7         3.2         1.6         2.0        3.10        4.30        3.85         2.0         2.5         2.0         4.0         4.0         4.0
         600           1          30           8           3           1       22.60       21.90       99.00          12          19          99         1.0         1.5        99.0         3.5         3.0        99.0         3.5         3.0        99.0         1.0         1.5        99.0         4.0         3.5        99.0         2.0         2.0        99.0    3.67    3.17   99.00    1.33    1.67   99.00         3.5         3.4        99.0         2.0         1.5        99.0        3.75        3.95       99.00         3.0         3.0        99.0         3.5         3.0        99.0
         601           1          23           6           3           0       19.55       19.75       19.70          26          11          22         2.0         1.5         1.0         1.5         2.0         2.0         2.0         3.5         2.0         1.0         1.0         1.5         1.5         2.5         1.5         3.5         2.0         3.0    1.67    2.67    1.83    2.17    1.50    1.83         3.6         3.7         3.4         3.9         2.4         3.0        2.85        3.65        3.20         4.0         4.5         4.0         3.0         3.0         3.0
         602           2          32           7           4          99       20.20       99.00       20.05          17          99          14         1.0        99.0         1.0         2.0        99.0         2.0         1.5        99.0         2.0         1.0        99.0         1.0         1.5        99.0         3.0         1.0        99.0         1.5    1.67   99.00    2.33    1.00   99.00    1.17         2.5        99.0         2.3         2.0        99.0         1.5        3.25       99.00        3.40         3.5        99.0         2.5         2.5        99.0         2.0
         603           2          20           7           3           1       21.20       99.00       99.00          13          99          99         1.5        99.0        99.0         3.5        99.0        99.0         3.0        99.0        99.0         1.0        99.0        99.0         1.5        99.0        99.0         2.0        99.0        99.0    2.67   99.00   99.00    1.50   99.00   99.00         3.9        99.0        99.0         3.0        99.0        99.0        3.45       99.00       99.00         3.0        99.0        99.0         3.0        99.0        99.0
         604           1          19           7           3           0       16.65       18.80       19.70          24          15          18         2.5         1.5         1.5         2.5         3.0         2.0         2.0         2.0         2.0         1.0         1.0         1.0         3.0         2.5         1.5         3.0         2.5         2.0    2.50    2.50    1.83    2.17    1.67    1.50         3.3         4.0         3.6         2.9         1.7         2.5        3.20        4.15        3.55         3.0         4.0         3.5         3.0         3.0         3.0
         605           1          21           7           3           0       11.85       99.00       99.00          24          15          99         1.0         1.0        99.0         2.5         3.5        99.0         2.5         2.5        99.0         1.0         1.0        99.0         1.0         2.5        99.0         3.0         2.0        99.0    2.00    2.83   99.00    1.67    1.33   99.00         2.7         4.2        99.0         2.6         1.6        99.0        3.05        4.30       99.00         3.5         3.5        99.0         3.5         3.0        99.0
         606           1          20           7           3           1       19.00       17.50       17.85          18          17          14         1.0         2.0         1.0         2.0         2.0         2.0         2.0         2.5         2.0         1.0         1.5         2.0         2.0         2.0         2.0         2.0         3.0         3.0    2.00    2.17    2.00    1.33    2.17    2.00         2.9         3.2         2.7         1.8         1.3         1.8        3.55        3.95        3.45         3.0         3.0         2.0         3.5         3.0         3.0
         607           2          20           7           3           0       24.85       99.00       99.00          11          99          99         1.0        99.0        99.0         4.0        99.0        99.0         4.0        99.0        99.0         1.0        99.0        99.0         4.0        99.0        99.0         1.0        99.0        99.0    4.00   99.00   99.00    1.00   99.00   99.00         3.9        99.0        99.0         1.8        99.0        99.0        4.05       99.00       99.00         2.5        99.0         3.0         4.0        99.0         4.0
         608           1          19           7           3           1        9.05       11.25       99.00          24          25          99         1.0         1.0        99.0         1.5         2.0        99.0         3.0         2.5        99.0         1.5         1.0        99.0         4.0         2.5        99.0         2.0         4.0        99.0    2.83    2.33   99.00    1.50    2.00   99.00         3.0         2.8        99.0         1.8         2.4        99.0        3.60        3.20       99.00         4.5         4.0        99.0         3.0         3.0        99.0
         609           2          23           7           3           0       19.15       17.50       18.05          13          16          19         1.0         1.0         1.0         3.0         3.0         3.0         2.5         2.5         2.0         1.0         1.0         1.0         3.0         3.0         1.5         2.5         3.0         3.0    2.83    2.83    2.17    1.50    1.67    1.67         3.5         3.0         2.9         1.4         1.7         2.1        4.05        3.65        3.40         2.0         1.5         2.5         4.0         3.5         2.0
         610           2          34           8           3           0       11.90       10.10       11.75          25          19          25         3.0         4.0         2.5         3.0         4.0         3.0         2.0         3.0         2.5         1.0         1.0         1.0         1.0         2.0         2.0         3.0         3.5         3.5    2.00    3.00    2.50    2.33    2.83    2.33         2.6         2.1         1.8         3.7         3.6         3.6        2.45        2.25        2.10         5.0         5.0         5.0         3.5         3.5         3.0
         611           1          20           7           3           1       22.05       22.35       20.70           9           9          12         1.0         1.0         1.0         3.5         4.0         4.0         2.5         1.0         3.0         1.0         1.0         1.0         2.5         2.0         2.5         2.0         2.5         2.0    2.83    2.33    3.17    1.33    1.50    1.33         4.1         3.9         4.3         1.7         1.1         1.4        4.20        4.40        4.45         4.0         3.5         3.0         5.0         5.0         4.5
         612           1          21           7           3           1       17.80       18.85       99.00          25          22          99         1.0         1.0        99.0         2.0         2.0        99.0         3.0         2.5        99.0         1.0         1.5        99.0         3.0         3.5        99.0         3.0         2.5        99.0    2.67    2.67   99.00    1.67    1.67   99.00         3.4        99.0        99.0         2.0        99.0        99.0        3.70       99.00       99.00         3.0         2.5        99.0         3.0         3.5        99.0
         613           2          19           7           3           0       27.30       99.00       21.95           9          99           8         1.0        99.0         1.0         3.0        99.0         3.0         4.0        99.0         1.0         1.0        99.0         1.5         4.0        99.0         2.0         2.0        99.0         1.5    3.67   99.00    2.00    1.33   99.00    1.33         3.5        99.0         2.8         1.0        99.0         1.0        4.25       99.00        3.90         1.5        99.0         1.5         3.0        99.0         3.0
         614           1          20           7           3           1       22.40       20.30       17.10          18          15          19         1.5         2.5         2.5         3.0         3.5         3.0         2.5         2.5         2.0         1.0         1.0         1.0         2.5         3.0         3.0         2.0         3.0         2.5    2.67    3.00    2.67    1.50    2.17    2.00         3.6         3.6         3.3         3.7         2.0         1.9        2.95        3.80        3.70         4.0         4.0         4.5         5.0         5.0         5.0
         615           2          21           7           3           1       22.80       99.00       23.40          19          99          12         1.0        99.0         1.0         3.5        99.0         3.5         2.5        99.0         3.0         1.0        99.0         1.5         3.5        99.0         3.0         2.0        99.0         2.0    3.17   99.00    3.17    1.33   99.00    1.50         2.9        99.0         3.5         2.2        99.0         1.6        3.35       99.00        3.95         2.5        99.0         2.5         3.0        99.0         3.5
         616           1          21           7           3           1       21.85       18.40       17.75          26          21          25         1.0         1.0         2.0         3.5         3.5         4.0         3.5         3.0         3.0         1.5         1.5         1.5         3.5         2.0         2.5         2.5         3.0         3.5    3.50    2.83    3.17    1.67    1.83    2.33         3.5         3.6         4.3         1.2         1.8         1.7        4.15        3.90        4.30         4.0         3.5         4.5         1.5         3.0         4.0
         617           1          25           7           3           1       19.95       22.35       18.60          18          14          18         1.0         1.0         1.0         2.5         3.0         2.5         3.0         2.5         2.0         1.0         1.5         1.0         2.5         3.0         2.5         2.0         2.0         2.0    2.67    2.83    2.33    1.33    1.50    1.33         3.0         3.8         3.2         2.3         1.3         1.2        3.35        4.25        4.00         4.0         2.5         3.0         3.0         3.0         3.0
         618           1          29           7           3           1       13.55       12.10       16.40          28          29          17         3.5         3.0         1.0         2.0         2.0         2.5         4.0         2.5         2.0         2.0         1.5         1.0         2.5         2.0         2.5         3.5         3.5         2.0    2.83    2.17    2.33    3.00    2.67    1.33         4.4         4.6         4.7         2.8         3.2         2.7        3.80        3.70        4.00         4.0         4.0         3.5         3.0         3.0         2.0
         619           1          26           8           3           0       14.90       14.75       99.00          24          17          99         1.0         1.0        99.0         2.0         2.0        99.0         2.5         2.0        99.0         1.0         2.0        99.0         1.5         1.5        99.0         3.0         3.5        99.0    2.00    1.83   99.00    1.67    2.17   99.00         3.9         3.2        99.0         3.2         2.6        99.0        3.35        3.30       99.00         4.5         4.0        99.0         3.5         3.0        99.0
         620           1          24           7           3           1       14.80       99.00       99.00          23          99          99         2.0        99.0        99.0         1.5        99.0        99.0         2.0        99.0        99.0         1.0        99.0        99.0         1.5        99.0        99.0         2.0        99.0        99.0    1.67   99.00   99.00    1.67   99.00   99.00         2.0        99.0        99.0         2.9        99.0        99.0        2.55       99.00       99.00         4.5        99.0        99.0         3.0        99.0        99.0
         621           2          26           7           3           1       20.65       99.00       99.00          16          99          99         1.0        99.0        99.0         2.0        99.0        99.0         3.5        99.0        99.0         1.0        99.0        99.0         3.5        99.0        99.0         1.5        99.0        99.0    3.00   99.00   99.00    1.17   99.00   99.00         4.1        99.0        99.0         1.9        99.0        99.0        4.10       99.00       99.00         3.0        99.0        99.0         3.0        99.0        99.0
         622           1          22           7           3           1       18.75       19.55       15.10          18          17          27         1.5         1.5         1.5         2.0         3.0         2.5         2.5         2.5         2.0         2.0         1.0         1.0         3.5         3.0         2.0         1.5         2.0         3.5    2.67    2.83    2.17    1.67    1.50    2.00         3.3         3.0         2.2         1.8         1.6         3.2        3.75        3.70        2.50         4.5         4.0         4.5         3.0         3.0         3.5
         623           1          21           7           3           0       13.90       16.20       12.90          27          26          26         1.0         1.0         1.0         2.0         2.0         1.5         2.0         2.0         2.0         2.0         1.5         2.0         1.5         3.0         1.5         3.0         2.0         2.5    1.83    2.33    1.67    2.00    1.50    1.83         2.7         2.3         2.6         3.2         2.5         2.0        2.75        2.90        3.30         5.0         5.0         5.0         2.5         2.0         2.5
         624           1          28           7           3           0       17.50       15.10       16.15          32          29          25         1.0         1.0         1.0         4.0         3.5         3.5         2.5         2.0         2.0         2.0         1.0         1.5         2.5         3.0         2.5         2.5         3.0         2.0    3.00    2.83    2.67    1.83    1.67    1.50         3.0         3.2         3.2         3.2         2.8         2.6        2.90        3.20        3.30         4.0         4.0         3.5         3.5         3.0         3.0
         625           1          28           8           7          99       15.45       14.25       12.10          27          26          28         1.0         1.0         2.0         3.0         3.0         4.0         1.5         2.0         1.5         1.0         1.0         2.0         2.5         3.0         2.0         3.5         3.5         3.0    2.33    2.67    2.50    1.83    1.83    2.33         2.9         2.9         3.1         2.8         3.5         3.8        3.05        2.70        2.65         4.0         4.0         3.5         4.0         4.0         4.0
         626           1          26           7           3           1       19.45       15.30       99.00          22          27          99         1.0         2.0        99.0         2.0         2.0        99.0         2.5         2.0        99.0         2.0         4.0        99.0         2.5         1.5        99.0         3.0         4.0        99.0    2.33    1.83   99.00    2.00    3.33   99.00         2.5         2.6        99.0         1.9         3.8        99.0        3.30        2.40       99.00         2.0         4.0        99.0         2.5         2.5        99.0
         627           2          26           7           3           0       16.15       99.00       16.25          32          99          27         3.5        99.0         1.0         4.0        99.0         3.0         1.0        99.0         1.0         1.0        99.0         1.0         1.0        99.0         1.0         4.0        99.0         1.5    2.00   99.00    1.67    2.83   99.00    1.17         4.4        99.0         3.2         1.6        99.0         2.0        4.40       99.00        3.60         1.5        99.0         2.0         3.0        99.0         3.0
         628           2          29           8           4          99       17.85       99.00       99.00          18          99          99         2.5        99.0        99.0         2.0        99.0        99.0         3.0        99.0        99.0         2.5        99.0        99.0         2.0        99.0        99.0         3.0        99.0        99.0    2.33   99.00   99.00    2.67   99.00   99.00         3.0        99.0        99.0         2.7        99.0        99.0        3.15       99.00       99.00         3.0        99.0        99.0         3.5        99.0        99.0
         629           1          27           8           8           0       23.30       23.45       25.50          16          27          16         1.0         2.0         1.0         2.5         3.0         3.0         3.5         2.5         2.5         1.5         1.5         2.0         3.5         3.0         3.0         1.5         1.5         1.5    3.17    2.83    2.83    1.33    1.67    1.50         3.0         2.3         2.2         2.5         2.5         2.1        3.25        2.90        3.05         3.5         3.5         3.0         2.5         3.5         2.5
         630           2          25           8           3           0       13.50       14.00       13.65          25          23          26         1.5         1.5         2.0         2.0         2.0         2.0         2.0         1.5         1.5         2.0         2.0         2.0         1.5         1.5         1.0         3.0         3.5         2.5    1.83    1.67    1.50    2.17    2.33    2.17         2.8         3.4         3.1         2.6         3.0         3.0        3.10        3.20        3.05         4.0         4.0         4.5         3.0         3.0         2.5
         631           2          24           8           8           0       19.75       18.40       19.90          21          24          19         1.0         1.0         1.0         3.5         2.0         2.0         2.0         2.0         2.0         1.0         1.0         1.0         3.5         3.0         4.0         4.0         4.0         3.5    3.00    2.33    2.67    2.00    2.00    1.83         2.9         2.4         2.6         2.6         3.0         2.4        3.15        2.70        3.10         3.5         2.5         2.0         3.5         3.5         3.0
         632           1          31          10           3           0       16.55       17.10       16.25          18          21          19         1.0         1.5         1.0         2.0         2.0         2.5         2.5         3.0         1.0         1.0         1.0         1.0         2.5         3.0         1.5         2.5         2.0         2.5    2.33    2.67    1.67    1.50    1.50    1.50         2.8         3.2         3.1         2.7         2.7         2.8        3.05        3.25        3.15         4.0         4.0         3.5         3.5         3.5         3.5
         633           1          34           7           3           0       12.55       13.20       99.00          19          26          99         1.5         1.0        99.0         3.5         2.0        99.0         3.0         2.5        99.0         1.0         1.5        99.0         2.5         1.5        99.0         3.5         3.0        99.0    3.00    2.00   99.00    2.00    1.83   99.00         4.1         3.8        99.0         1.9         1.6        99.0        4.10        4.10       99.00         3.5         2.0        99.0         4.0         4.0        99.0
         634           1          23           8           4          99       21.20       19.00       17.15          13          17          18         1.0         1.0         1.0         2.0         3.0         2.5         2.0         3.0         3.0         2.0         1.5         1.5         2.0         2.5         2.5         3.0         2.5         3.0    2.00    2.83    2.67    2.00    1.67    1.83         2.1         2.6         2.6         2.3         2.3         2.6        2.90        3.15        3.00         5.0         5.0         4.5         3.5         3.5         3.5
         635           1          25           8           3           0       17.90       18.60       18.60          23          18          26         2.0         1.0         1.5         4.0         4.0         4.0         3.0         3.0         1.0         1.0         1.0         1.0         4.0         4.0         3.0         3.0         2.0         2.5    3.67    3.67    2.67    2.00    1.33    1.67         3.3         4.1         3.4         1.7         1.8         1.9        3.80        4.15        3.75         4.5         3.5         3.5         4.0         4.0         4.0
         636           2          30           8           3           1       16.85       99.00       99.00          26          99          99         1.5        99.0        99.0         2.0        99.0        99.0         2.5        99.0        99.0         2.0        99.0        99.0         3.0        99.0        99.0         3.0        99.0        99.0    2.50   99.00   99.00    2.17   99.00   99.00         2.3        99.0        99.0         3.1        99.0        99.0        2.60       99.00       99.00         3.5        99.0        99.0         2.0        99.0        99.0
         637           2          27           7           3           1       22.05       23.65       26.00          16          15           6         1.5         1.0         1.0         2.5         3.0         3.0         2.0         2.0         2.0         1.5         1.0         1.0         3.0         3.0         2.0         1.0         1.0         1.0    2.50    2.67    2.33    1.33    1.00    1.00         3.2         3.7         4.0         1.8         1.7         1.7        3.70        4.00        4.15         2.0         2.0         2.0         4.5         4.5         4.5
         638           1          23           7           3           0       17.15       17.50       17.15          19          17          18         1.0         2.5         2.5         2.0         3.0         3.0         2.0         2.5         3.0         1.0         2.5         2.5         1.5         3.0         2.5         1.5         3.0         2.0    1.83    2.83    2.83    1.17    2.67    2.33         3.3         3.0         3.3         1.6         2.2         1.9        3.85        3.40        3.70         3.0         3.0         3.0         3.5         3.0         3.0
         639           1          26           8           3           0       15.10       17.65       15.60          26          17          23         2.5         1.5        99.0         2.0         2.5        99.0         1.5         1.5        99.0         2.0         1.5        99.0         2.5         3.0        99.0         3.5         2.5        99.0    2.00    2.33   99.00    2.67    1.83   99.00         3.3         3.8        99.0         1.5         1.1        99.0        3.90        4.35       99.00         4.5         4.0         4.0         3.0         2.5         1.5
         640           2          25           8           3           0       19.20       17.20       17.85          22          20          21         3.0         2.5         3.0         3.0         2.5         2.5         2.5         2.5         3.0         3.0         2.5         2.5         3.0         3.0         2.0         3.0         3.0         2.5    2.83    2.67    2.50    3.00    2.67    2.67         3.0         3.3         3.2         3.1         2.9         3.0        2.95        3.20        3.10         2.0         3.0         3.5         4.0         2.5         3.0
         641           1          20           7           3           1       99.00       15.75       19.35          99          18          15        99.0         1.0         1.0        99.0         2.0         2.0        99.0         3.5         3.0        99.0         2.0         2.0        99.0         2.0         2.5        99.0         2.5         2.0   99.00    2.50    2.50   99.00    1.83    1.67        99.0         3.5         3.4        99.0         1.9         1.8       99.00        3.80        3.80        99.0         3.5         3.0        99.0         4.0         3.5
         642           2          19           7           3           0       18.55       16.35       17.15          19          15          26         1.5         1.5         1.5         2.0         3.0         2.0         3.0         3.0         1.5         1.5         3.0         2.5         3.5         3.0         2.5         2.5         2.5         2.5    2.83    3.00    2.00    1.83    2.33    2.17         3.4         2.9         2.6         1.8         1.8         2.6        3.80        3.55        3.00         3.5         4.0         4.0         3.0         3.0         2.0
         643           2          26           9           3           0       24.50       99.00       99.00          10          99          99         1.0        99.0        99.0         3.5        99.0        99.0         4.0        99.0        99.0         1.0        99.0        99.0         2.5        99.0        99.0         1.5        99.0        99.0    3.33   99.00   99.00    1.17   99.00   99.00         4.3        99.0        99.0         1.5        99.0        99.0        4.40       99.00       99.00         2.5        99.0        99.0         3.5        99.0        99.0
         644           1          22           7           3           1       16.45       17.95       17.30          23          19          20         1.0         3.0         2.0         2.0         2.5         4.0         3.5         3.0         3.0         1.0         1.5         1.5         3.0         2.5         2.5         1.0         1.5         1.0    2.83    2.67    3.17    1.00    2.00    1.50         2.7         3.1         1.8         2.8         2.5         2.9        2.95        3.30        2.45         4.5         4.0         5.0         3.5         4.5         4.5
         645           2          27           8           3           0       20.80       20.35       99.00          21          21          99         2.5         2.5        99.0         1.5         3.0        99.0         3.0         2.0        99.0         4.0         3.0        99.0         3.0         3.0        99.0         1.5         3.0        99.0    2.50    2.67   99.00    2.67    2.83   99.00         3.0         4.0        99.0         2.9         2.9        99.0        3.05        3.55       99.00         1.5         3.0        99.0         3.5         2.0        99.0
         646           2          38          10           4          99       21.20       21.15       21.50          21          18          16         2.0         1.5         1.5         3.5         4.0         3.0         2.0         2.0         2.0         1.0         1.0         1.0         3.0         3.0         2.0         2.5         2.5         2.0    2.83    3.00    2.33    1.83    1.67    1.50         3.5         3.5         3.8         2.3         3.0         1.8        3.60        3.25        4.00         2.0         2.0         3.0         3.5         3.5         3.5
         647           1          22           7           3           1       15.90       99.00       99.00          12          99          99         1.5        99.0        99.0         4.0        99.0        99.0         1.0        99.0        99.0         1.0        99.0        99.0         1.0        99.0        99.0         4.0        99.0        99.0    2.00   99.00   99.00    2.17   99.00   99.00         4.2        99.0        99.0         2.1        99.0        99.0        4.05       99.00       99.00         4.0        99.0        99.0         2.5        99.0        99.0
         648           2          22           7           3           0       15.50       14.30       99.00          25          25          99         1.0         3.0        99.0         3.0         2.5        99.0         4.0         3.5        99.0         3.0         2.5        99.0         3.5         3.0        99.0         2.5         3.0        99.0    3.50    3.00   99.00    2.17    2.83   99.00         2.6         1.8        99.0         2.2         1.9        99.0        3.20        2.95       99.00         3.0         2.5         3.5         2.0         2.0         1.5
         649           1          23           7           3           1       18.60       99.00       99.00          16          99          99         2.0        99.0        99.0         3.5        99.0        99.0         3.0        99.0        99.0         1.0        99.0        99.0         2.5        99.0        99.0         2.0        99.0        99.0    3.00   99.00   99.00    1.67   99.00   99.00         3.2        99.0        99.0         1.6        99.0        99.0        3.80       99.00       99.00         4.0        99.0        99.0         3.0        99.0        99.0
         650           1          32           8           4          99       11.80       13.75       13.30          24          26          36         2.0         1.0         4.0         1.0         2.0         2.0         2.5         2.0         2.0         2.0         1.5         1.5         2.0         1.5         1.5         3.5         3.0         4.0    1.83    1.83    1.83    2.50    1.83    3.17         1.6         1.7         2.0         3.1         2.9         4.1        2.25        2.40        1.95         2.5         4.0         3.5         2.0         2.0         2.5
         651           1          26           7           3           0       17.90       16.70       99.00          20          28          99         1.0         2.5        99.0         2.5         2.5        99.0         3.0         2.5        99.0         1.5         1.5        99.0         3.0         2.5        99.0         2.5         3.0        99.0    2.83    2.50   99.00    1.67    2.33   99.00         3.3         2.2        99.0         1.9         2.7        99.0        3.70        2.75       99.00         2.5         4.0        99.0         4.0         4.0        99.0
         652           1          20           7           3           1       23.15       99.00       19.75           6          99          22         2.0        99.0         1.0         3.0        99.0         3.0         3.5        99.0         2.0         2.5        99.0         2.0         4.0        99.0         3.5         2.0        99.0         2.0    3.50   99.00    2.83    2.17   99.00    1.67         3.3        99.0         3.4         1.0        99.0         1.7        4.15       99.00        3.85         1.5        99.0         3.0         3.0        99.0         3.0
         653           1          23           7           3           0       14.70       16.90       15.35          31          25          23         2.5         3.5         3.0         2.0         2.0         3.0         1.5         2.0         2.0         1.5         2.0         2.0         1.5         1.0         2.0         1.5         3.5         2.0    1.67    1.67    2.33    1.83    3.00    2.33         2.9         2.3         2.6         2.7         2.2         3.9        3.10        3.05        2.35         5.0         4.0         4.5         3.0         3.0         3.0
         654           1          24           7           3           1       16.30       99.00       99.00          25          99          99         1.5        99.0        99.0         2.0        99.0        99.0         3.0        99.0        99.0         2.5        99.0        99.0         3.0        99.0        99.0         2.0        99.0        99.0    2.67   99.00   99.00    2.00   99.00   99.00         2.0        99.0        99.0         2.6        99.0        99.0        2.70       99.00       99.00         4.0        99.0        99.0         3.0        99.0        99.0
         655           2          26           8           4          99       12.35       99.00        9.65          19          99          18         1.0        99.0         1.0         1.5        99.0         1.0         3.0        99.0         1.0         1.0        99.0         1.0         1.0        99.0         1.0         2.0        99.0         2.0    1.83   99.00    1.00    1.33   99.00    1.33         2.5        99.0         3.2         2.5        99.0         3.1        3.00       99.00        3.05         5.0        99.0         5.0         3.5        99.0         3.0
         656           1          21           7           3           1       21.80       99.00       99.00          14          99          99         2.0        99.0        99.0         3.5        99.0        99.0         2.5        99.0        99.0         1.5        99.0        99.0         3.0        99.0        99.0         2.0        99.0        99.0    3.00   99.00   99.00    1.83   99.00   99.00         4.0        99.0        99.0         1.9        99.0        99.0        4.05       99.00       99.00         3.5        99.0        99.0         4.5        99.0        99.0
         657           1          29           8           5          99       11.65       12.25       11.35          29          23          29         2.0         2.5         3.0         2.5         2.0         2.0         2.0         1.5         2.0         1.5         1.0         2.0         2.0         2.0         2.0         2.5         3.0         3.5    2.17    1.83    2.00    2.00    2.17    2.83         2.2         2.3         3.0         2.6         3.1         3.2        2.80        2.60        2.90         5.0         3.0         4.5         3.0         2.5         2.5
         658           1          23           7           3           0       15.95       16.85       18.00          27          22          22         1.0         1.0         1.0         2.0         2.5         2.5         2.0         1.0         1.0         1.5         2.0         1.5         2.5         2.0         1.5         3.0         3.0         3.0    2.17    1.83    1.67    1.83    2.00    1.83         2.9         2.8         2.7         2.9         2.7         2.7        3.00        3.05        3.00         3.5         4.0         3.5         2.0         2.5         2.0
         659           2          28           8           4          99       23.10       19.35       19.50          14          21          20         1.0         1.0         1.0         3.5         3.0         3.5         3.0         3.0         3.0         1.0         1.0         1.0         3.5         3.5         3.0         2.0         2.0         2.0    3.33    3.17    3.17    1.33    1.33    1.33         3.7         2.5         3.9         1.1         1.8         1.6        4.30        3.35        4.15         2.0         3.5         1.5         3.0         3.5         3.0
         660           1          21           8           3           0       17.10       99.00       99.00          17          99          99         2.5        99.0        99.0         1.5        99.0        99.0         3.0        99.0        99.0         2.5        99.0        99.0         2.0        99.0        99.0         1.5        99.0        99.0    2.17   99.00   99.00    2.17   99.00   99.00         3.3        99.0        99.0         2.8        99.0        99.0        3.25       99.00       99.00         4.5        99.0        99.0         3.5        99.0        99.0
         661           2          23          10           1          99       18.45       16.65       99.00          19          19          99         2.5         3.0        99.0         2.5         3.5        99.0         2.5         2.5        99.0         1.5         1.5        99.0         2.5         3.0        99.0         3.5         3.5        99.0    2.50    3.00   99.00    2.50    2.67   99.00         3.2         3.2        99.0         2.5         2.4        99.0        3.35        3.40       99.00         3.0         2.5        99.0         2.0         2.0        99.0
         662           1          22           7           3           1       23.45       24.85       25.60          12           5          16         1.5         1.0         1.0         3.5         2.0         2.5         3.0         2.5         2.0         1.0         1.0         1.0         2.5         3.0         2.0         2.5         1.0         1.0    3.00    2.50    2.17    1.67    1.00    1.00         4.0         3.6         4.3         1.2         1.1         1.3        4.40        4.25        4.50         1.5         1.5         1.5         4.5         4.0         4.0
         663           1          33           8           5          99       21.50       20.40       23.05          27          13           9         1.0         1.0         1.0         4.0         4.0         4.0         3.0         3.0         3.0         1.0         1.0         1.0         1.5         2.5         2.0         3.0         1.0         2.5    2.83    3.17    3.00    1.67    1.00    1.50         2.6         3.0         3.9         3.4         2.5         1.8        2.60        3.25        4.05         3.5         3.0         2.5         4.5         3.0         4.0
         664           1          20           7           3           1       11.40       13.15       14.90          26          22          25         1.5         1.0         1.5         2.5         3.0         3.5         2.0         2.5         1.0         1.5         1.0         1.0         2.0         2.5         3.0         3.0         3.5         3.0    2.17    2.67    2.50    2.00    1.83    1.83         2.9         3.7         3.7         3.3         2.6         2.8        2.80        3.55        3.45         4.5         3.0         3.5         3.5         3.0         3.0
         665           1          24           7           3           0       20.70       20.65       22.30          21          20          15         1.5         2.5         1.0         3.0         3.0         3.0         2.5         2.0         2.5         1.0         1.0         1.5         3.0         2.5         2.5         2.0         3.0         1.5    2.83    2.50    2.67    1.50    2.17    1.33         3.4         3.5         3.8         2.4         2.1         2.0        3.50        3.70        3.90         3.5         3.5         3.5         4.5         4.5         4.5
         666           1          58           4           4          99       23.10       99.00       99.00          14          99          99         1.0        99.0        99.0         1.0        99.0        99.0         2.0        99.0        99.0         1.0        99.0        99.0         4.0        99.0        99.0         2.0        99.0        99.0    2.33   99.00   99.00    1.33   99.00   99.00         3.6        99.0        99.0         1.5        99.0        99.0        4.05       99.00       99.00         2.0        99.0        99.0         4.0        99.0        99.0
         667           1          69           8           9           0       23.85       24.90       23.80          12          18          15         1.0         1.0         1.0         3.0         3.0         2.0         3.0         3.0         3.0         1.5         1.5         1.5         3.0         2.5         3.0         2.0         1.0         2.0    3.00    2.83    2.67    1.50    1.17    1.50         4.0         4.3         4.5         1.8         1.8         1.8        4.10        4.25        4.35         2.5         2.0         3.0         4.0         4.5         4.0
         668           1          21           7           3           0       12.45       99.00       99.00          25          99          99         2.0        99.0        99.0         2.0        99.0        99.0         2.0        99.0        99.0         2.0        99.0        99.0         2.0        99.0        99.0         3.0        99.0        99.0    2.00   99.00   99.00    2.33   99.00   99.00         2.0        99.0        99.0         3.6        99.0        99.0        2.20       99.00       99.00         5.0        99.0        99.0         3.0        99.0        99.0
         669           1          20           7           3           1       13.30       14.15       13.10          25          20          20         2.5         1.0         1.0         2.0         2.0         2.0         1.0         2.0         2.0         3.0         1.5         1.5         2.0         2.0         2.0         3.0         3.0         3.0    1.67    2.00    2.00    2.83    1.83    1.83         1.9         3.3         3.4         3.4         1.6         2.2        2.25        3.85        3.60         4.0         4.0         4.0         2.5         3.0         3.0
         670           1          22           8           3           0       13.45       99.00       99.00          27          99          99         2.0        99.0        99.0         2.0        99.0        99.0         2.0        99.0        99.0         1.5        99.0        99.0         2.0        99.0        99.0         3.5        99.0        99.0    2.00   99.00   99.00    2.33   99.00   99.00         3.8        99.0        99.0         3.2        99.0        99.0        3.30       99.00       99.00         4.0        99.0        99.0         5.0        99.0        99.0
         671           2          27           8           3           0       16.50       17.20       17.95          19          17          21         2.0         4.0         2.5         2.0         2.5         3.5         2.0         3.0         3.0         1.0         2.5         3.0         2.0         3.0         3.5         2.0         3.0         3.0    2.00    2.83    3.33    1.67    3.17    2.83         2.2         3.1         2.9         3.1         3.8         2.9        2.55        2.65        3.00         1.5         3.0         3.5         4.5         3.0         3.0
         672           1          22           1           1          99       19.70       15.55       17.85          25          23          23         2.0         3.5         2.0         1.5         2.0         3.0         2.5         3.5         2.5         2.5         2.5         2.0         3.0         3.5         3.0         1.5         3.0         2.5    2.33    3.00    2.83    2.00    3.00    2.17         2.7         3.3         2.9         2.8         3.3         3.1        2.95        3.00        2.90         1.5         1.5         2.5         5.0         3.0         3.0
         673           1          33           8           4          99       14.95       13.90       15.00          19          16          16        99.0         1.5         2.0        99.0         3.0         3.0        99.0         2.0         2.0        99.0         1.5         2.0        99.0         1.5         2.0        99.0         3.0         3.0   99.00    2.17    2.33   99.00    2.00    2.33        99.0         2.0         2.8        99.0         1.4         1.4       99.00        3.30        3.70         4.0         4.0         4.0         4.5         3.5         4.0
         674           1          24           7           3           0       18.30       99.00       99.00          26          99          99         1.0        99.0        99.0         3.0        99.0        99.0         4.0        99.0        99.0         1.0        99.0        99.0         2.5        99.0        99.0         2.5        99.0        99.0    3.17   99.00   99.00    1.50   99.00   99.00         2.3        99.0        99.0         1.2        99.0        99.0        3.55       99.00       99.00         2.5        99.0        99.0         5.0        99.0        99.0
         675           1          27           7           7          99       17.25       19.65       99.00          21          14          99         1.0         1.5        99.0         3.0         3.5        99.0         3.5         3.0        99.0         1.0         1.5        99.0         3.0         2.0        99.0         2.5         2.0        99.0    3.17    2.83   99.00    1.50    1.67   99.00         3.7         3.5        99.0         1.4         1.5        99.0        4.15        4.00       99.00         3.5         3.0        99.0         2.0         2.5        99.0
         676           1          22           7           3           1       26.45       24.80       22.55           8           8           7        99.0         1.5         1.0        99.0         3.0         3.5        99.0         3.0         2.5        99.0         1.0         1.5        99.0         3.5         3.0        99.0         1.5         2.0   99.00    3.17    3.00   99.00    1.33    1.50        99.0         3.5         3.6        99.0         1.4         1.5       99.00        4.05        4.05         1.5         1.5         1.5         4.0         3.5         3.0
         677           1          22           7           3           1       25.45       23.80       23.30          13          17          19         1.5         1.5         1.0         3.5         3.5         3.5         1.5         3.0         3.0         1.5         1.5         1.0         3.0         3.0         3.0         1.0         1.0         1.5    2.67    3.17    3.17    1.33    1.33    1.17         3.7         4.0         3.8         1.2         1.5         1.8        4.25        4.25        4.00         2.0         2.0         2.5         4.0         4.0         4.0
         678           1          23           7           3           0       99.00       16.80       16.75          99          23          25        99.0         2.0         2.5        99.0         2.0         2.0        99.0         2.5         2.0        99.0         2.0         2.0        99.0         2.5         2.0        99.0         2.5         3.0   99.00    2.33    2.00   99.00    2.17    2.50        99.0         3.0         2.6        99.0         3.0         3.1       99.00        3.00        2.75        99.0         4.0         4.5        99.0         3.0         3.5
         679           1          21           7           3           1       22.55       23.65       24.30          23          30          25         1.0         2.5         2.0         3.5         4.0         4.0         3.5         3.0         3.0         2.0         1.5         3.0         4.0         3.5         3.5         1.5         1.0         1.5    3.67    3.50    3.50    1.50    1.67    2.17         2.9         2.5         3.4         2.7         3.0         2.0        3.10        2.75        3.70         4.5         3.5         4.5         4.0         4.0         4.0
[truncated: 7,068 more chars]
